# Supplementary material for: High-time-resolution chemical composition and source apportionment of PM 2.5 in northern Chinese cities: implications for policy
Source: Copernicus journal article supplement (doi:10.5194/egusphere-2023-457), 2023-04-17
Supplement: Supplementary file 1 [file egusphere-2023-457-supplement.pdf]

1 ***Supplement of***

2 **High-time-resolution chemical composition and source apportionment of PM<sub>2.5</sub> in northern Chinese cities:**  
3 **implications for policy**

4 Yong Zhang<sup>1,2,3</sup>, Jie Tian<sup>1,2,4</sup>, Qiyuan Wang<sup>1,2,3,4\*</sup>, Lu Qi<sup>5</sup>, Manousos Ioannis Manousakas<sup>5</sup>, Yuemei Han<sup>1,4</sup>, Weikang  
5 Ran<sup>1,2</sup>, Yele Sun<sup>6</sup>, Huikun Liu<sup>1,2,4</sup>, Renjian Zhang<sup>6</sup>, Yunfei Wu<sup>6</sup>, Tianqu Cui<sup>5</sup>, Kaspar Rudolf Daellenbach<sup>5</sup>, Jay Gates  
6 Slowik<sup>5</sup>, André S. H. Prévôt<sup>5</sup>, Junji Cao<sup>6\*</sup>

7 <sup>1</sup> State Key Laboratory of Loess and Quaternary Geology, Institute of Earth Environment, Chinese Academy  
8 of Sciences, Xi'an 710061, China

9 <sup>2</sup> National Observation and Research Station of Regional Ecological Environment Change and  
10 Comprehensive Management in the Guanzhong Plain, Shaanxi, Xi'an 710061, China

11 <sup>3</sup> University of Chinese Academy of Sciences, Beijing 100049, China

12 <sup>4</sup> Center for Excellence in Quaternary Science and Global Change, Xi'an 710061, China

13 <sup>5</sup> Laboratory of Atmospheric Chemistry, Paul Scherrer Institute (PSI), Villigen 5232, Switzerland

14 <sup>6</sup> Institute of Atmospheric Physics, Chinese Academy of Sciences, Beijing 100029, China

15 *Correspondence:* wangqy@ieecas.cn (Qiyuan Wang), jjcao@mail.iap.ac.cn (Junji Cao).

16 **Text S1. Selction of inputted HERM chemical species and its uncertainty calculation**

17 Considering the validity and credibility of monitoring data, chemical species including OA, NO<sub>3</sub><sup>-</sup>, SO<sub>4</sub><sup>2-</sup>, NH<sub>4</sub><sup>+</sup>,  
18 Cl<sup>-</sup>, and BC were all selected to input HERM model for three pilot cities. For inorganic elements, Si, K, Ca, Cr, Mn,  
19 Fe, Ni, Cu, Zn, As, Se, Ba, and Pb in Xi'an and Beijing, and Si, K, Ca, Ti, Cr, Mn, Fe, Ni, Cu, Zn, As, Se, Ba, and  
20 Pb in Shijiazhuang were selected for source apportionment, respectively.

21 The uncertainty data of chemical species inputting HERM was calculated according to the recommendation in  
22 the PMF5.0 user guideline. If the measured chemical species concentration is greater than the minimum detection  
23 limit (MDL) provided, the uncertainty (Unc) calculation is based following equation:

$$24 \text{Unc}_i = \sqrt{(C_i \times E_i)^2 + (0.5 \times \text{MDL}_i)^2} \quad (1)$$

25 where  $C_i$  represents measured concertation for species  $i$ ,  $E_i$  represents error fraction of species  $i$ . For online  
26 measured data, the error fraction was recommended to use 10% (Rai et al., 2020). If the measured concentration is  
27 less than or equal to the MDL provided, the Unc is calculated as the following equation:

$$28 \text{Unc} = \frac{5}{6} \times \text{MDL} \quad (2)$$

29

30 **Text S2 Diagnostics of HERM solutions**

31 In this study, factors numbering from two to ten were selected and run in the HERM software. Each factor  
32 solution was run thirty times with completely unconstrained profiles to explore the possible sources. The optimal  
33 factor number solution was determined by examining the ratio of Q and expected Q (Q<sub>exp</sub>). The Q<sub>exp</sub> in HERM was  
34 equal to (samples × species – factors × (samples + species) + the number of constrained source profiles). As shown  
35 in Fig. S5, the value of Q/Q<sub>exp</sub> decreased with the increase of the factor number, which suggests increasing the factor  
36 number could lead to a better explanation of the variance by HERM. However, the utility of increasing factors  
37 declined with the number of factors. Too many factors could cause splitting profiles, although the Q/Q<sub>exp</sub> may be  
38 desirable (Liu et al., 2021; Salameh et al., 2018, 2016). Thus, the drops of Q/Q<sub>exp</sub> ( $\Delta Q/Q_{\text{exp}}$ ) were subsequently  
39 evaluated to choose the optimal solution factor number. As shown in Table S2, when the number of factors increases  
40 to more than six in Xi'an, the value of  $\Delta Q/Q_{\text{exp}}$  shows a relatively stable change trend. A six-factor solution is  
41 preferable because  $\Delta Q/Q_{\text{exp}}$  between the five-solution and six-solution is smaller than that between the six-solution  
42 and seven-solution (Liu et al., 2021). In addition, secondary nitrate plus sulfate and biomass burning were mixed  
43 when the factor number was five, and vehicle emission was split into two profiles when the factor number was seven

44 (Table S3). Therefore, the six-factor solution was determined as the optimal HERM solution for Xi'an. Similar  
45 criterias were used for Shijiazhuang and Beijing, six-factor and eight-factor solutions were determined as optimal  
46 HERM solutions, respectively.

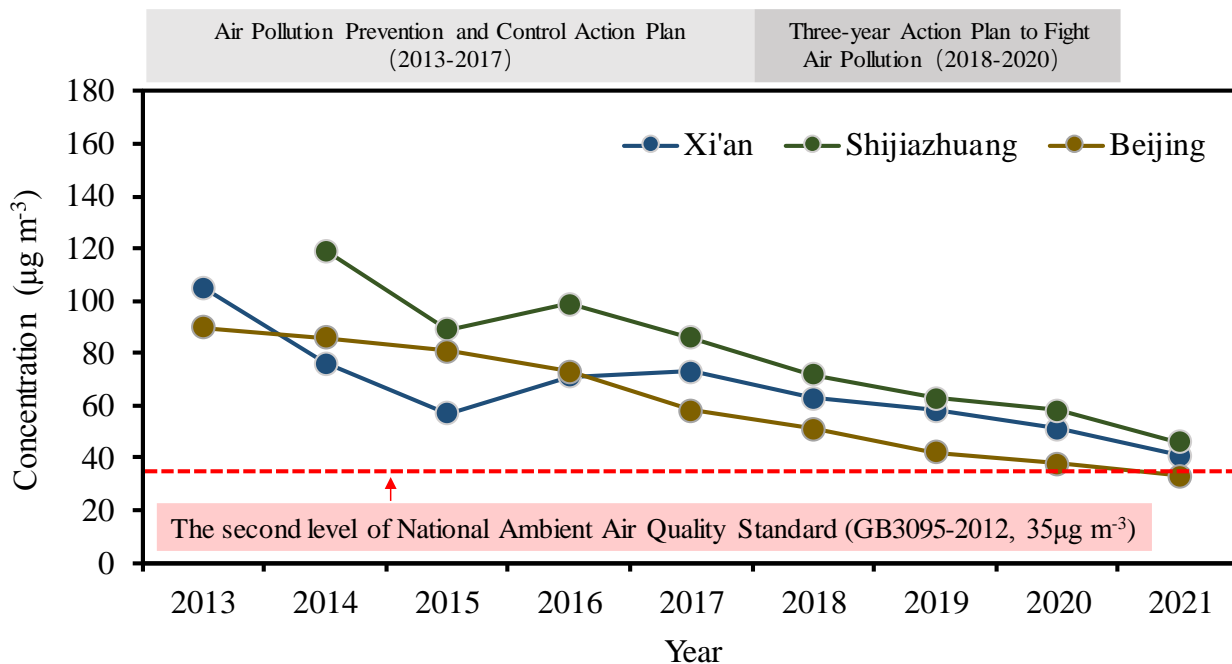

47  
 48 **Figure S1.** Annual average concentration of PM<sub>2.5</sub> from 2013 to 2021 in Xi'an, Shijiazhuang, and Beijing. (The data  
 49 are from the website of the local Ecological Environment Bureau, Xi'an: <http://xaepb.xa.gov.cn/>, Shijiazhuang:  
 50 <https://sthjj.sjz.gov.cn/>, Beijing: <http://sthjj.beijing.gov.cn/> ). The red dotted line represents the second level of the  
 51 National Ambient Air Quality Standard (GB3095-2012, 35 µg m<sup>-3</sup>)  
 52

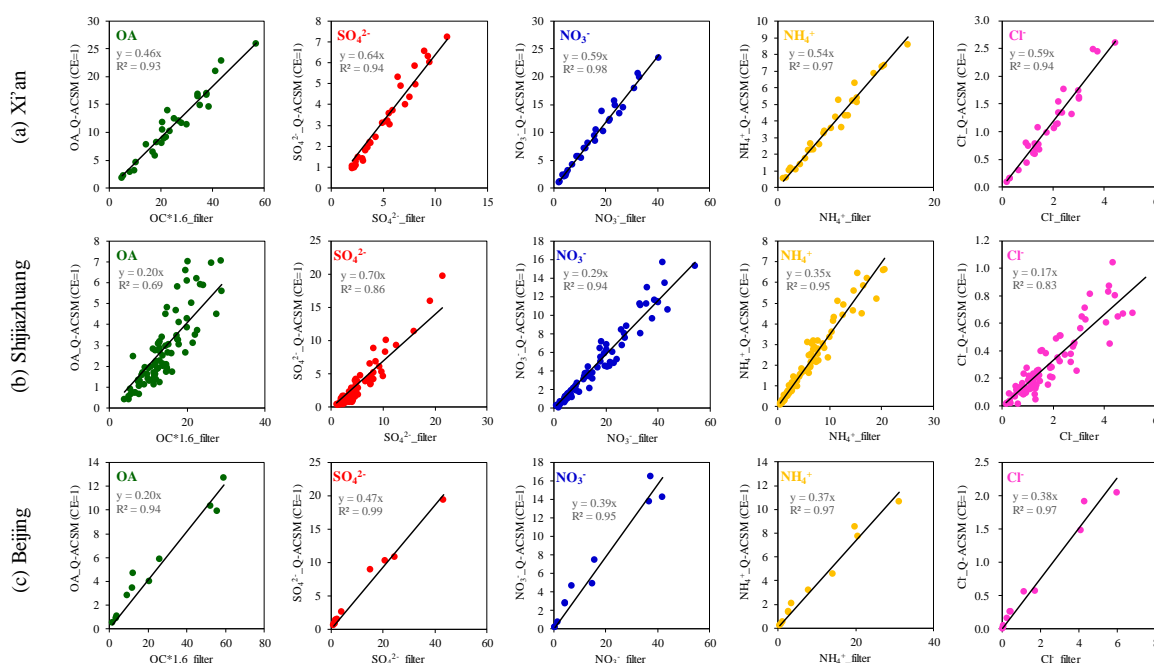

53  
 54 **Figure S2.** Correction of chemical components measured by Q-ACSM in different cities. During the campaigns,  
 55 offline filter samples were simultaneously sampled for the correction. In summary, 29 offline samples in Xi'an, 83  
 56 offline samples in Shijiazhuang, and 10 offline samples in Beijing were sampled respectively.

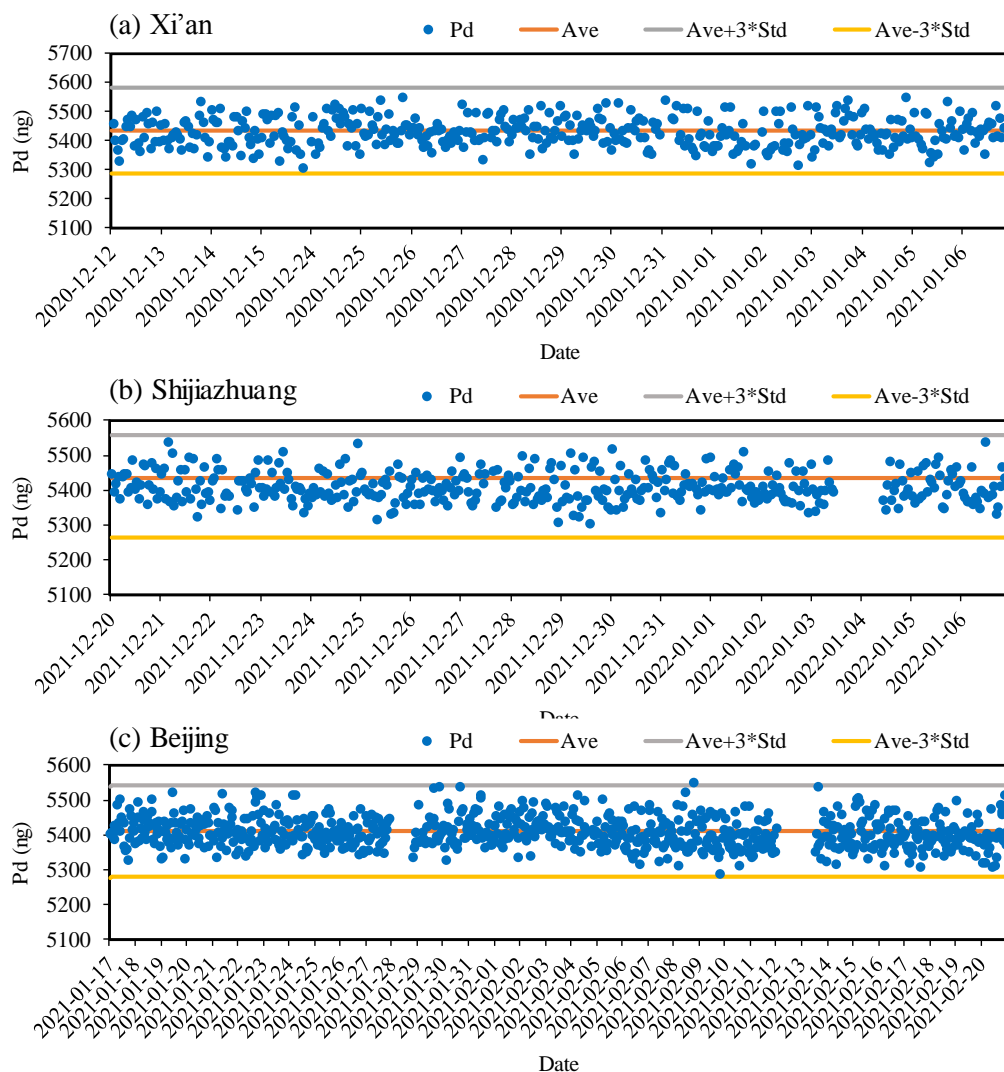

57

58 **Figure S3.** Concentration of the internal standard element (Pd) of Xact625 during sampling periods in (a) Xi'an,  
 59 (b) Shijiazhuang, and (c) Beijing.

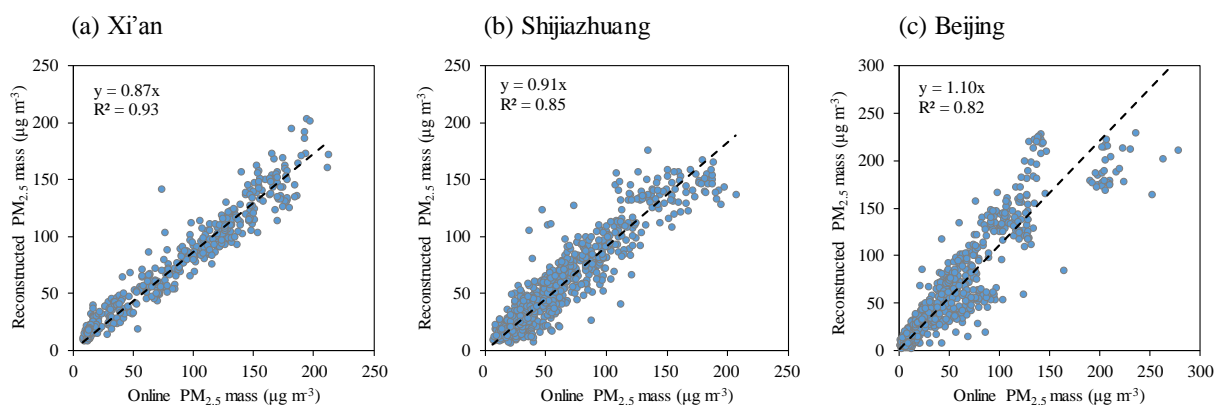

60

61 **Figure S4.** Correlation of online and reconstructed PM<sub>2.5</sub> concentration in (a) Xi'an, (b) Shijiazhuang, and (c) Beijing  
 62 during the campaigns. The online PM<sub>2.5</sub> mass data in the X axis from national monitor stations near sampling sites.

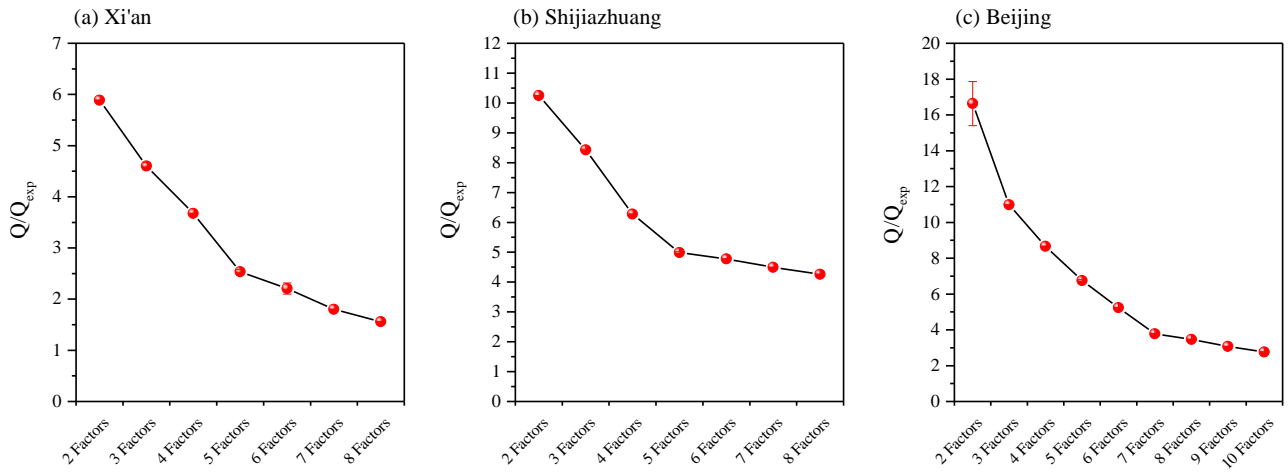

63

64 **Figure S5.** Values of  $Q/Q_{\text{exp}}$  for the unconstrained profile solutions with two to ten factors based on thirty runs in (a)  
 65 Xi'an, (b) Shijiazhuang, and (c) Beijing, respectively.

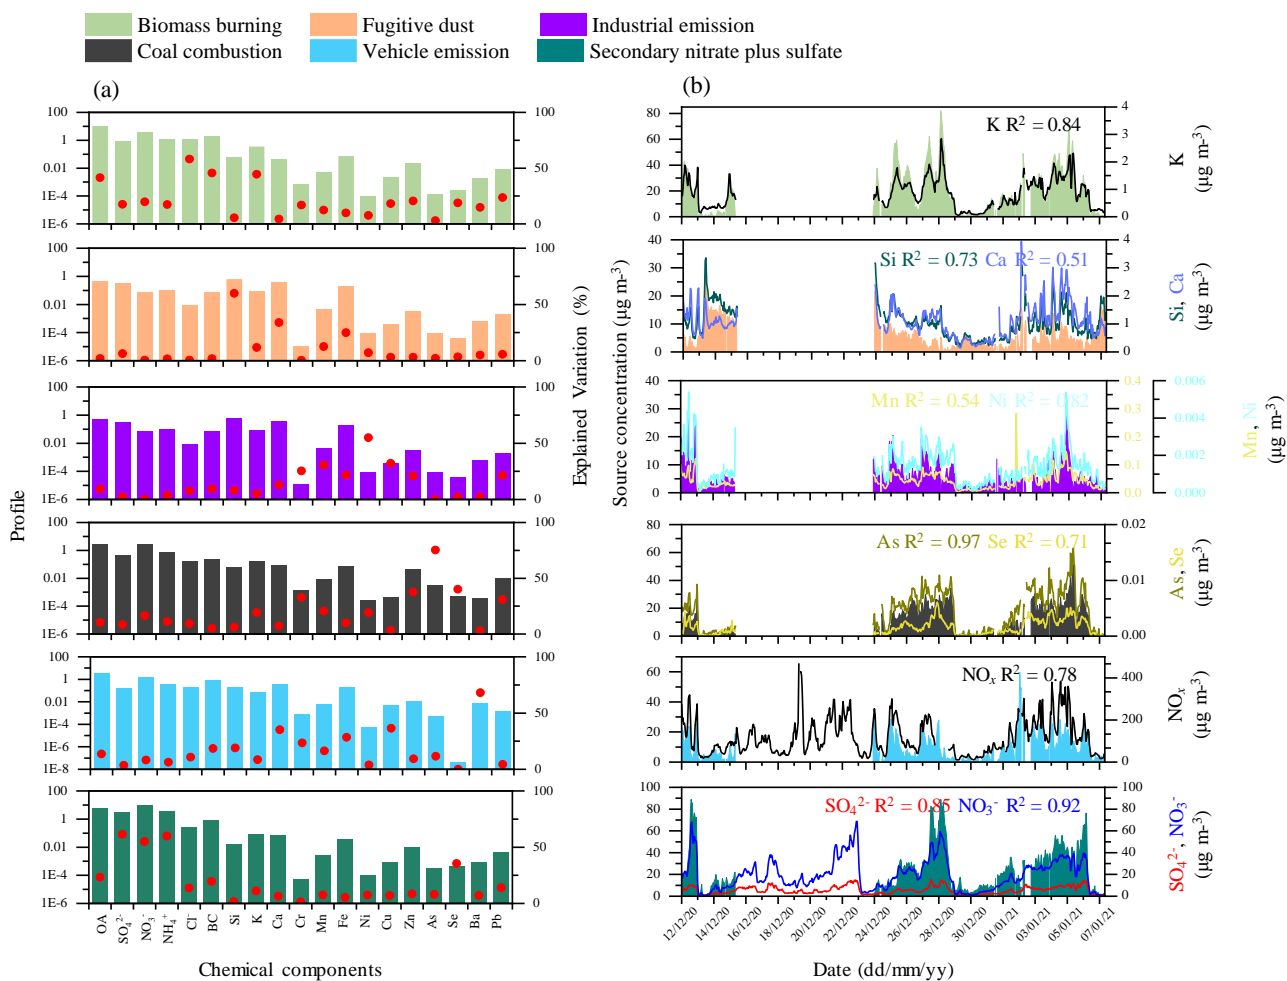

66

67 **Figure S6.** (a) Sources profiles obtained from HERM with a six-factor solution in Xi'an, the columns in each factor  
 68 are the profile that displays the relative relation of the absolute values of variables. The red dot represents the  
 69 explained variation (EV) in species for different factors. (b) Time series plots of sources concentration, including  
 70 biomass burning, fugitive dust, industrial emission, coal combustion, vehicle emission, and secondary nitrate plus  
 71 sulfate. The corresponding time trends of chemical tracers are also shown.

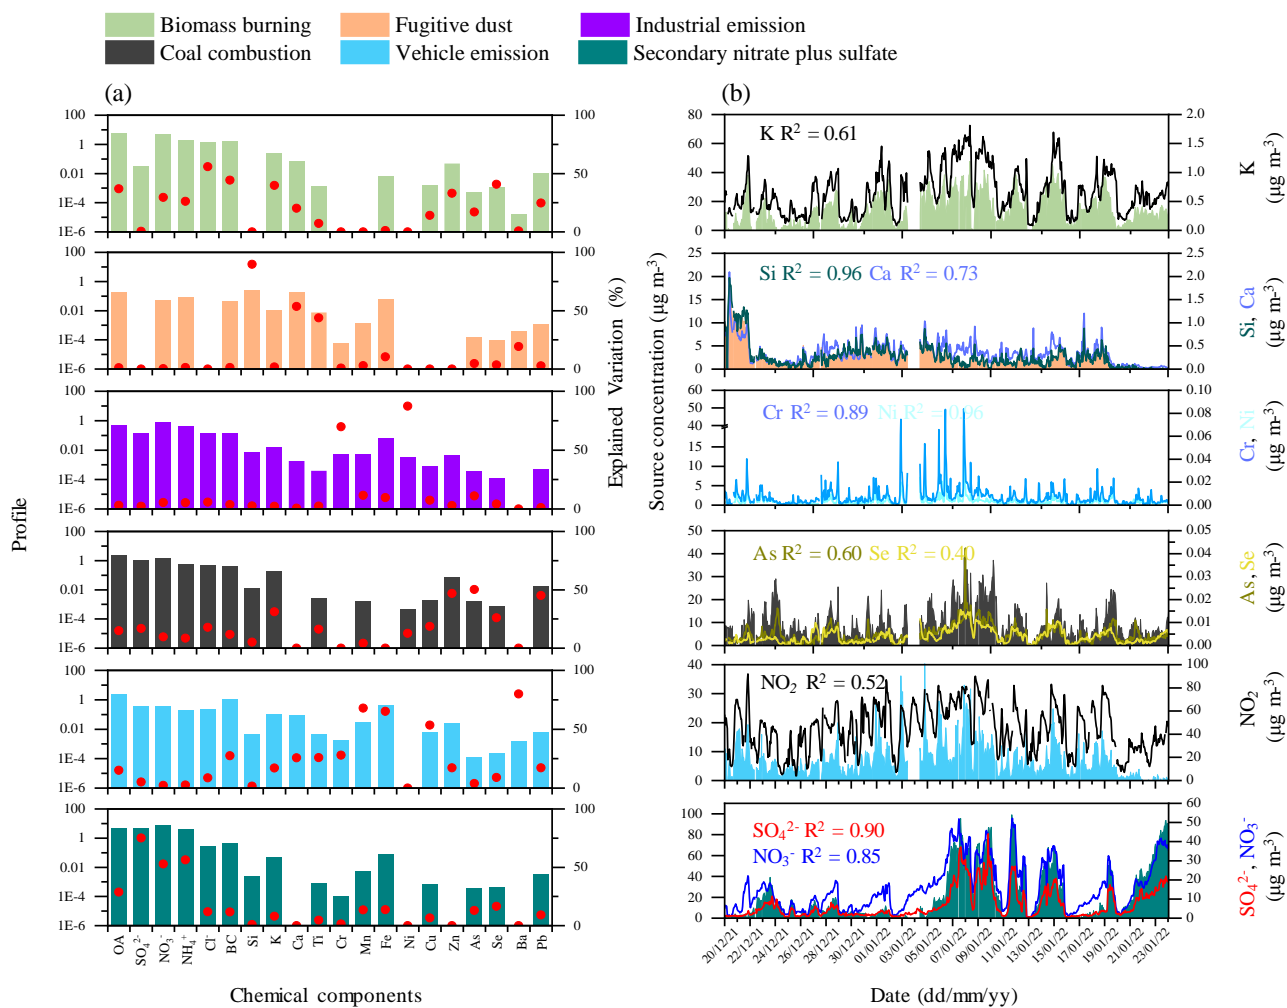

72

73 **Figure S7.** (a) Sources profiles obtained from HERM with a six-factor solution in Shijiazhuang, the columns in each  
 74 factor are the profile that displays the relative relation of the absolute values of variables. The red dot represents the  
 75 explained variation (EV) in species for different factors. (b) Time series plots of sources concentration, including  
 76 biomass burning, fugitive dust, industrial emission, coal combustion, vehicle emission, and secondary nitrate plus  
 77 sulfate. The corresponding time trends of chemical tracers are also shown.



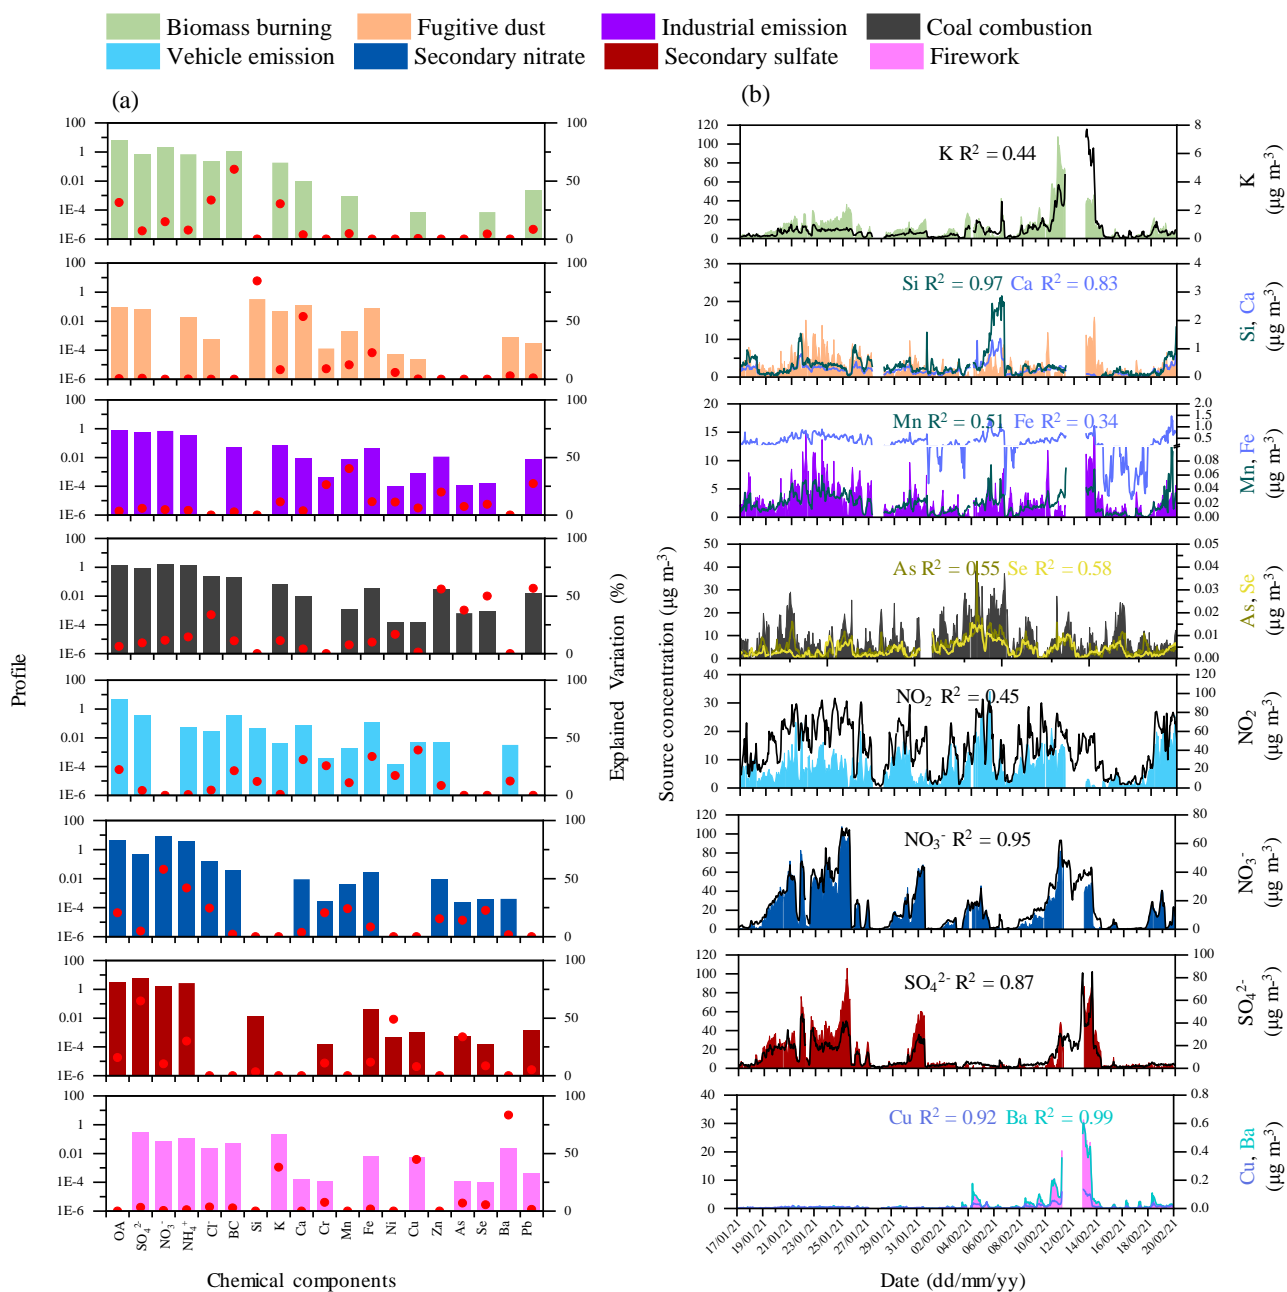

78

79 **Figure S8.** (a) Sources profiles obtained from HERM with an eight-factor solution in Beijing, the columns in each  
 80 factor are the profile that displays the relative relation of the absolute values of variables. The red dot represents the  
 81 explained variation (EV) in species for different factors. (b) Time series plots of sources concentration, including  
 82 biomass burning, fugitive dust, industrial emission, coal combustion, vehicle emission, secondary nitrate, secondary  
 83 sulfate, and firework. The corresponding time trends of chemical tracers are also shown.

84

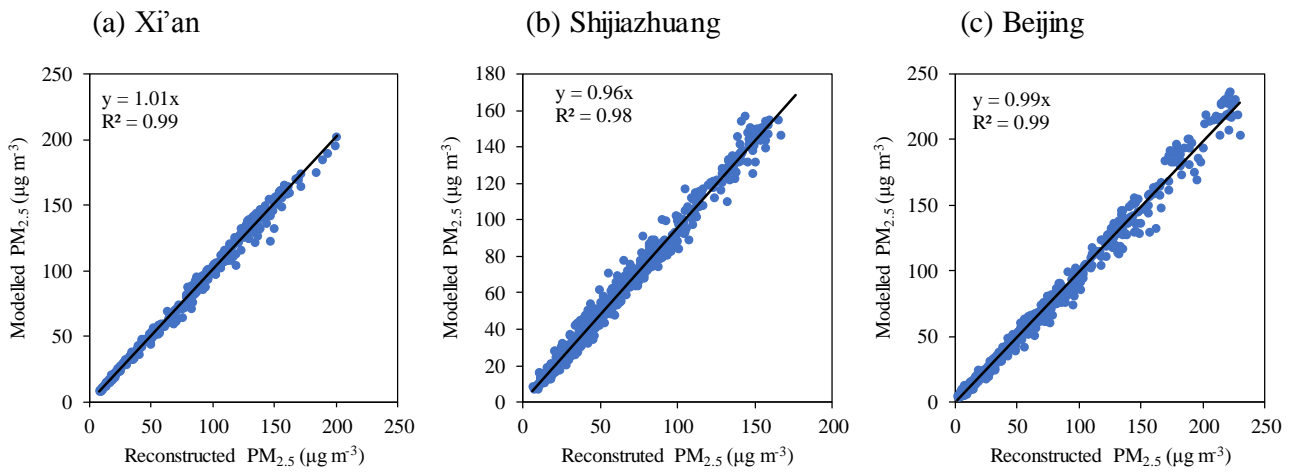

85

86 **Figure S9.** Correlation between reconstructed PM<sub>2.5</sub> and modeled PM<sub>2.5</sub> mass concentrations derived by HERM in  
87 Xi'an, Shijiazhuang, and Beijing with optimal solutions

88

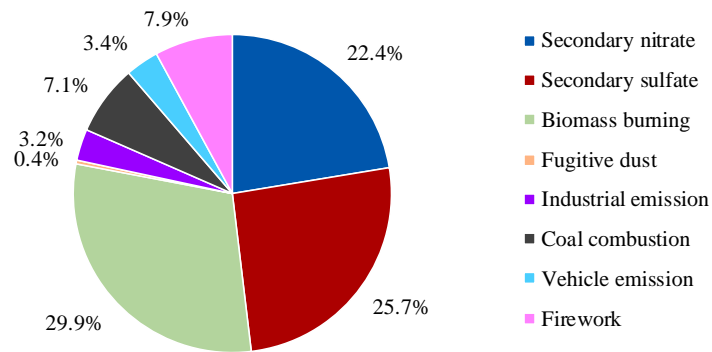

89

90 **Figure S10.** Source contribution of PM<sub>2.5</sub> during Chinese Spring Festival (from New Year's Eve to January 3<sup>rd</sup> of  
91 the Lunar Calendar) in Beijing

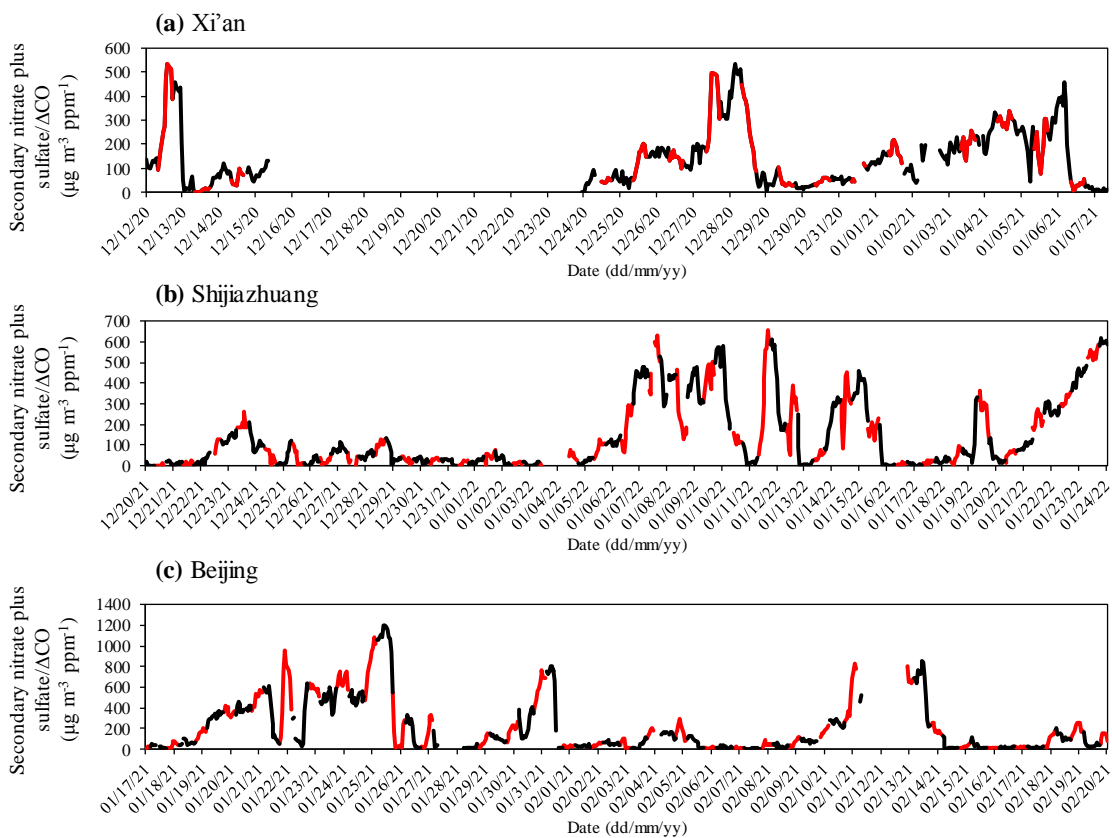

92

93 **Figure S11.** Time series plots of secondary nitrate plus sulfate/ $\Delta$ CO in (a) Xi'an, (b) Shijiazhuang, and (c) Beijing.  
 94 The red and black lines represent daytime (08:00-17:00 LST) and nighttime (18:00 - 07:00 the next day LST),  
 95 respectively.

96

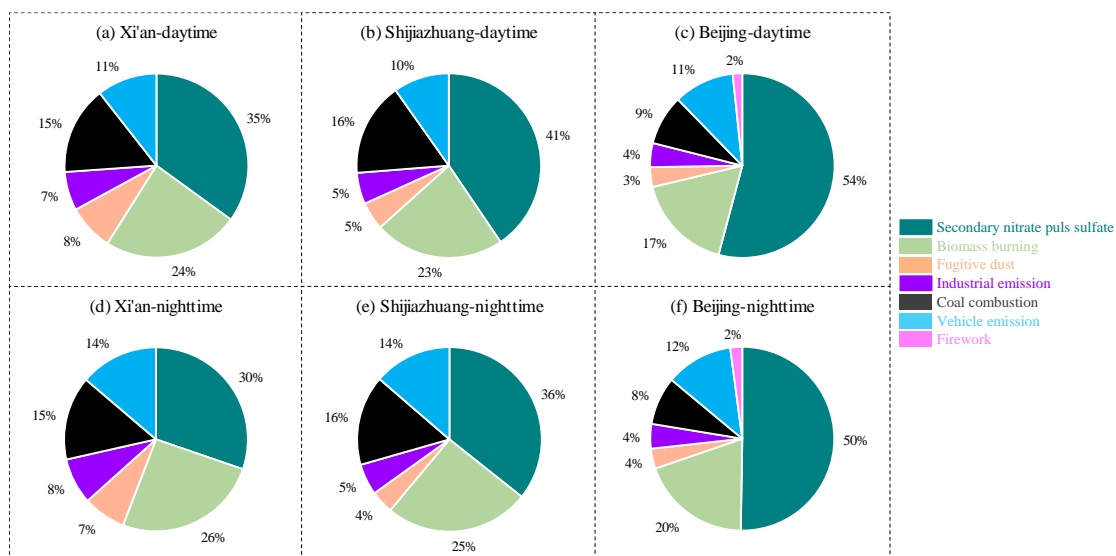

97

98 **Figure S12.** Source contribution of  $PM_{2.5}$  in three pilot cities during daytime and nighttime, respectively.

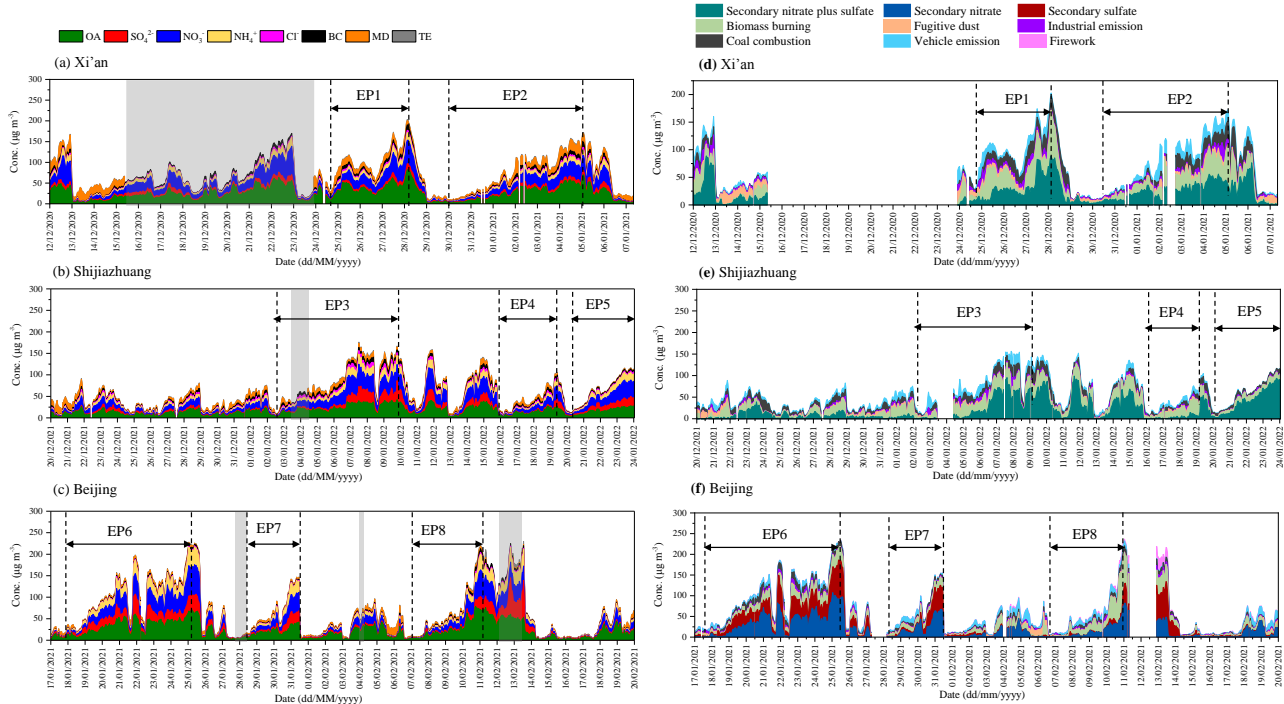

99

100 **Figure S13.** The pollution episodes selection according to temporal variation of PM<sub>2.5</sub> chemical components (a-c)  
 101 and source contribution (d-f) during the campaigns in Xi'an, Shijiazhuang, and Beijing, respectively. The gray shape  
 102 parts were lack of MD values due to the out-of-order Xact625, and missing values in the time series owing to the out-  
 103 of-order ACSM, AE33, and Xact625 at the same time.

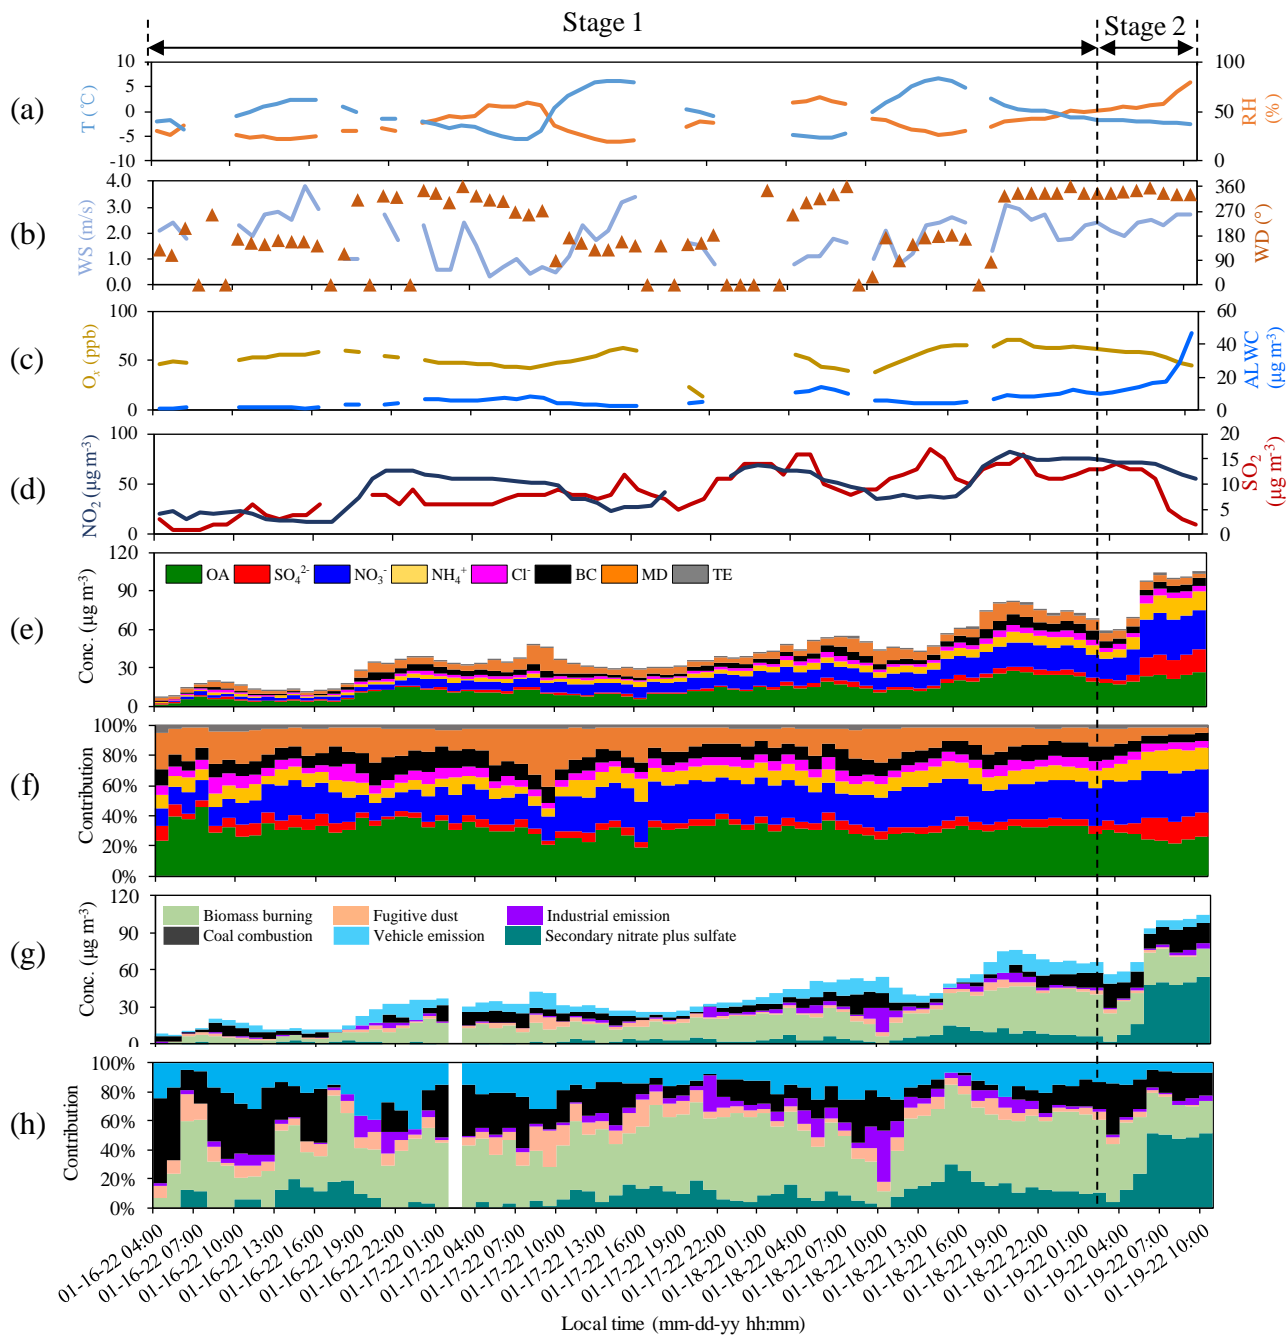

104

105 **Figure S14.** Time series of T and RH (a), WS and WD (b), O<sub>x</sub> and ALWC (c), NO<sub>2</sub> and SO<sub>2</sub> (d), chemical components  
 106 (e,f), and source contribution (g, h) of PM<sub>2.5</sub> during EP4 in Shijiazhuang.

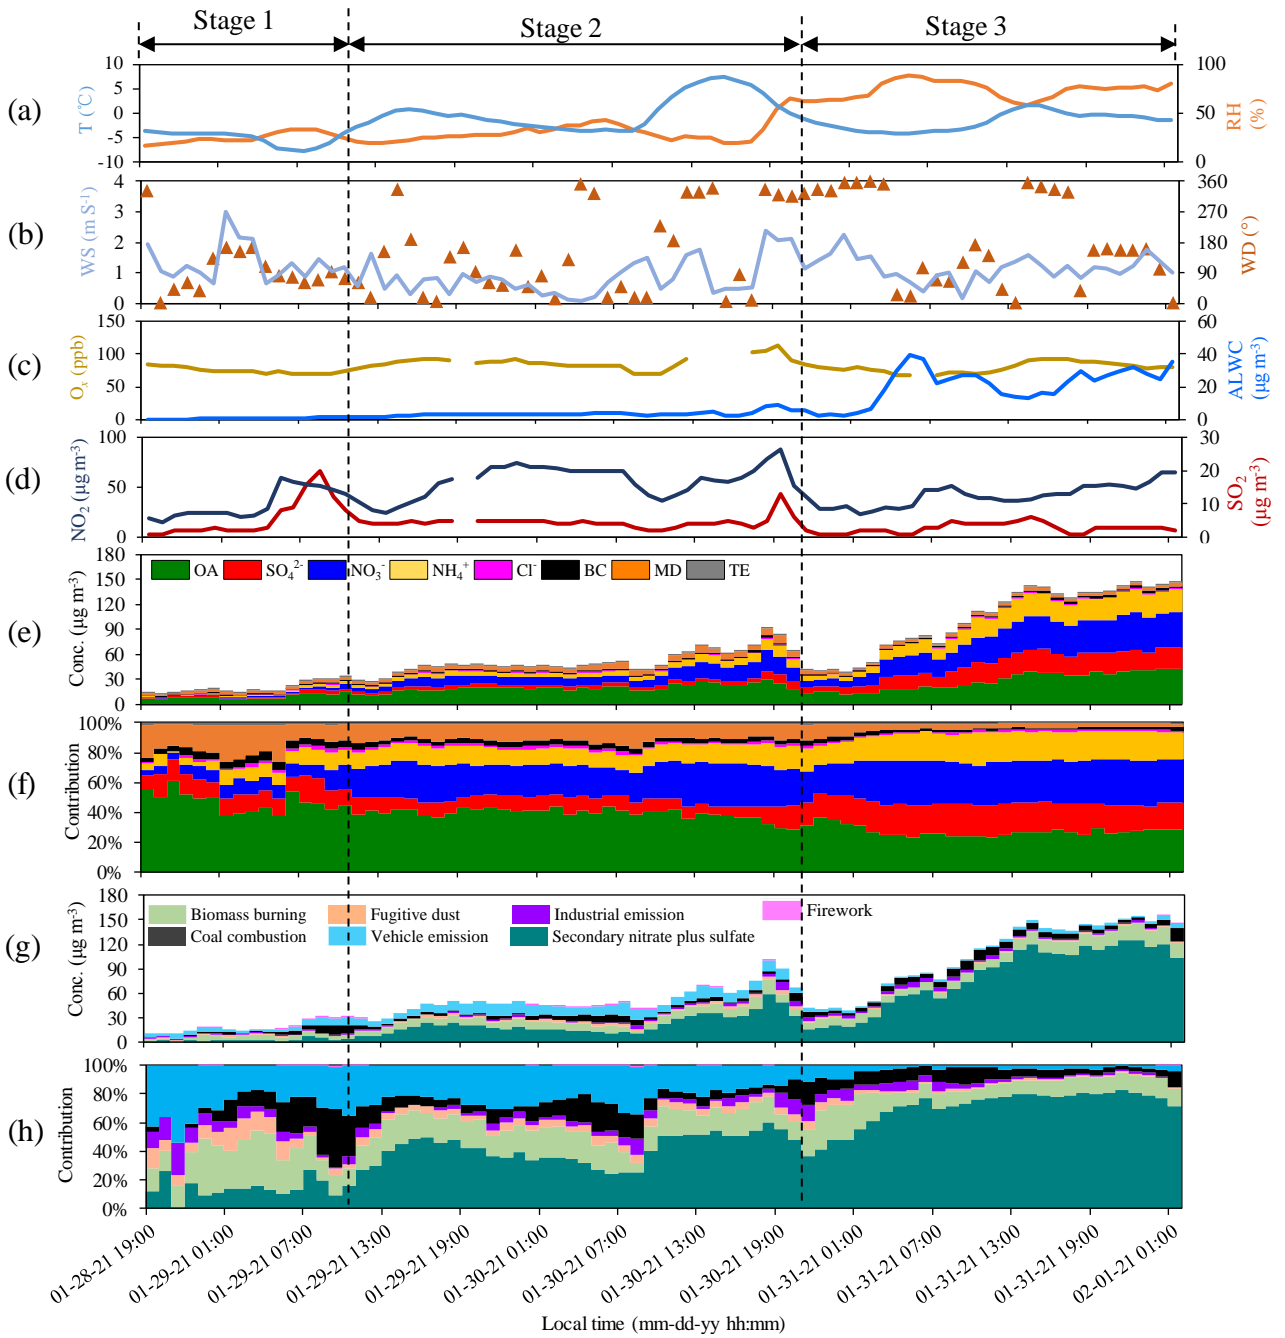

108

109 **Figure S15.** Time series of T and RH (a), WS and WD (b), O<sub>x</sub> and ALWC (c), NO<sub>2</sub> and SO<sub>2</sub> (d), chemical components  
 110 (e, f), and source contribution (g, h) of PM<sub>2.5</sub> during EP7 in Beijing

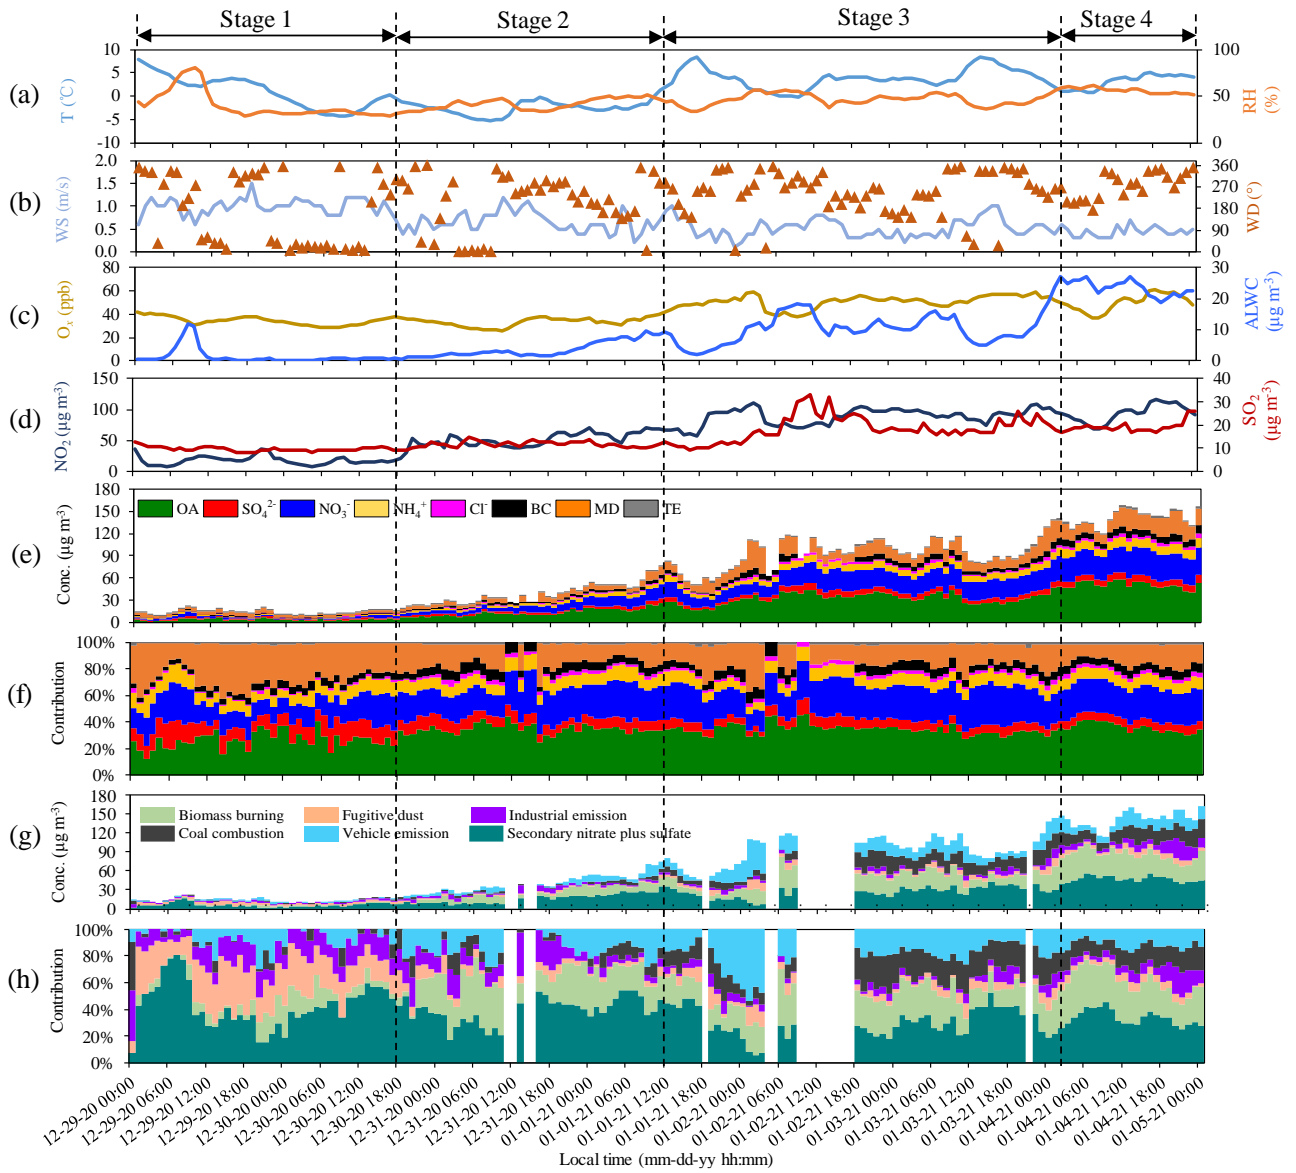

112

113 **Figure S16.** Time series of T and RH (a), WS and WD (b), O<sub>x</sub> and ALWC (c), NO<sub>2</sub> and SO<sub>2</sub> (d), chemical components  
 114 (e, f), and source contribution (g, h) of PM<sub>2.5</sub> during EP2 in Xi'an.

115 **Table S1.** Detailed information on complementary data for sampling sites

| Sampling site | National Air Quality Monitoring Station                     | National Meteorological Station                      | complementary data                                                                                                  |
|---------------|-------------------------------------------------------------|------------------------------------------------------|---------------------------------------------------------------------------------------------------------------------|
| Xi'an         | Gaoxinqiqu station, 1.1km from the sampling site            | Haidian station, 7.6 km from the sampling site       | hourly PM <sub>2.5</sub> , NO <sub>x</sub> , NO <sub>2</sub> , CO, SO <sub>2</sub> , O <sub>3</sub> , WS, WD, T, RH |
| Shijiazhuang  | Gaoxinqu station, 4.2 km from the sampling site             | Shijiazhuang station, 23.8 km from the sampling site | hourly PM <sub>2.5</sub> , NO <sub>2</sub> , CO, SO <sub>2</sub> , O <sub>3</sub> , WS, WD, T, RH                   |
| Beijing       | ChaoyangAotizhongxin station, 1.2 km from the sampling site | Jinghe station, 21.2 km from the sampling site       | hourly PM <sub>2.5</sub> , NO <sub>2</sub> , CO, SO <sub>2</sub> , O <sub>3</sub> , WS, WD, T, RH                   |

116 Note: WS: wind speed, WD: wind direction, T: temperature, RH: relative humidity.

117

118 **Table S2.** The  $\Delta Q/Q_{\text{exp}}$ <sup>a</sup> value with increasing factor number from two to ten of the runs in Xi'an, Shijiazhuang, and  
119 Beijing.

| Parameter <sup>b</sup> | $\Delta Q/Q_{\text{exp}}$ |              |         |
|------------------------|---------------------------|--------------|---------|
|                        | Xi'an                     | Shijiazhuang | Beijing |
| F2-F3                  | 1.3                       | 1.8          | 5.7     |
| F3-F4                  | 0.9                       | 2.2          | 2.3     |
| F4-F5                  | 1.1                       | 1.2          | 1.9     |
| F5-F6                  | 0.4                       | 0.3          | 1.5     |
| F6-F7                  | 0.3                       | 0.3          | 1.5     |
| F7-F8                  | 0.2                       | 0.2          | 0.3     |
| F8-F9                  |                           |              | 0.4     |
| F9-F10                 |                           |              | 0.3     |

120 <sup>a</sup>  $\Delta Q/Q_{\text{exp}}$  means the difference of  $Q/Q_{\text{exp}}$  of two sequent factor numbers.

121 <sup>b</sup> Parameters represent the factor numbers (F) – (F+1).

122



123 **Table S3.** Sources diagnostics with increasing factor numbers from four to ten of the runs in Xi'an, Shijiazhuang,  
 124 and Beijing.

| Factor number | Sources identification                                                                                    |                                                                                                                                                                                         |                                                                                                                                                                       |
|---------------|-----------------------------------------------------------------------------------------------------------|-----------------------------------------------------------------------------------------------------------------------------------------------------------------------------------------|-----------------------------------------------------------------------------------------------------------------------------------------------------------------------|
|               | Xi'an                                                                                                     | Shijiazhuang                                                                                                                                                                            | Beijing                                                                                                                                                               |
| 4             | Secondary nitrate plus sulfate mixed with biomass burning and coal burning mixed with industrial emission | i) Secondary nitrate plus sulfate mixed with primary sources including biomass burning and coal combustion<br>ii) Biomass burning, coal combustion, and vehicle emission was also mixed | i) Secondary sources mixed with primary sources including biomass burning, coal combustion, and vehicle emission<br>ii) Biomass burning and coal combustion was mixed |
| 5             | Secondary nitrate plus sulfate mixed with biomass burning                                                 | Biomass burning, coal combustion, and vehicle emissions were mixed                                                                                                                      | Secondary sulfate mixed with coal combustion and industrial emission; secondary nitrate mixed with biomass burning                                                    |
| 6             | Six individual sources were identified                                                                    | Six individual sources were identified                                                                                                                                                  | Secondary sulfate mixed with coal combustion and secondary nitrate mixed with industrial emission                                                                     |
| 7             | Vehicle emission was split into two profiles<br>Vehicle emission and industrial                           | Coal combustion was split into two profiles<br>Vehicle emission and coal combustion                                                                                                     | Secondary sulfate mixed with coal combustion                                                                                                                          |
| 8             | emission was split into two profiles, respectively.                                                       | were split into two profiles, respectively.                                                                                                                                             | Eight individual sources were identified                                                                                                                              |
| 9             |                                                                                                           |                                                                                                                                                                                         | Coal combustion was split into two profiles                                                                                                                           |
| 10            |                                                                                                           |                                                                                                                                                                                         | Coal combustion and biomass burning were split into two profiles, respectively.                                                                                       |

125

126 **Table S4.** Average concentrations of reconstructed PM<sub>2.5</sub> and its chemical species in Xi'an, Shijiazhuang, and Beijing  
 127 during the campaign\* ( $\mu\text{g m}^{-3}$ )

| Chemical Species                | Xi'an       | Shijiazhuang | Beijing     |
|---------------------------------|-------------|--------------|-------------|
| Reconstructed PM <sub>2.5</sub> | 77 ± 47     | 60 ± 39      | 64 ± 57     |
| OA                              | 25.9 ± 18.0 | 16.0 ± 9.7   | 22.1 ± 18.1 |
| SO <sub>4</sub> <sup>2-</sup>   | 5.2 ± 3.4   | 7.0 ± 7.6    | 9.6 ± 11.3  |
| NO <sub>3</sub> <sup>-</sup>    | 18.5 ± 14.5 | 15.8 ± 12.5  | 15.2 ± 16.7 |
| NH <sub>4</sub> <sup>+</sup>    | 6.2 ± 4.5   | 7.0 ± 5.5    | 9.2 ± 10.3  |
| Cl <sup>-</sup>                 | 1.9 ± 1.5   | 2.8 ± 2.2    | 0.7 ± 0.8   |
| BC                              | 4.5 ± 3.2   | 3.9 ± 2.5    | 1.9 ± 1.8   |
| MD <sup>a</sup>                 | 13.2 ± 7.0  | 6.0 ± 4.0    | 4.8 ± 3.8   |
| TE <sup>b</sup>                 | 1.1 ± 0.7   | 1.0 ± 0.6    | 0.9 ± 1.5   |

128 \* Data during Xact625 failure shown in Figure S2 was excluded to calculate average concentration of campaign

129 <sup>a</sup> MD means mineral dust, which is equal to 2.20Al + 2.49Si + 1.63Ca + 2.42Fe + 1.94Ti

130 <sup>b</sup> TE means trace elements which is equal to K + Cr + Mn + Ni + Cu + Zn + As + Se + Ba + Pb

131

132 **Table S5.** The nitrogen oxidation ratio (NOR) and sulfur oxidation ratio (SOR) in Xi'an, Beijing, and Shijiazhuang  
 133 during the campaigns<sup>a</sup>

| Parameters | Xi'an       | Shijiazhuang | Beijing     |
|------------|-------------|--------------|-------------|
| NOR        | 0.15 ± 0.08 | 0.20 ± 0.11  | 0.16 ± 0.12 |
| SOR        | 0.18 ± 0.08 | 0.36 ± 0.25  | 0.48 ± 0.23 |

134 <sup>a</sup> NOR =  $n(\text{NO}_3^-)/(n(\text{NO}_3^-) + n(\text{NO}_2))$ ; SOR =  $n(\text{SO}_4^{2-})/(n(\text{SO}_4^{2-}) + n(\text{SO}_2))$ . where  $n(\text{NO}_3^-)$ ,  $n(\text{NO}_2)$ ,  $n(\text{SO}_4^{2-})$ , and  $n(\text{SO}_2)$  are the molar  
 135 concentrations of  $\text{NO}_3^-$ ,  $\text{NO}_2$ ,  $\text{SO}_4^{2-}$ , and  $\text{SO}_2$ , respectively.

136

137 **Table S6.** The concentration of PM<sub>2.5</sub> and its main chemical components during wintertime in Xi'an, Shijiazhuang,  
 138 and Beijing in the last decades.

| City         | Year  | PM <sub>2.5</sub>  | OA <sup>a</sup>    | EC                 | SO <sub>4</sub> <sup>2-</sup> | NO <sub>3</sub> <sup>-</sup> | NH <sub>4</sub> <sup>+</sup> | Others             | References         |
|--------------|-------|--------------------|--------------------|--------------------|-------------------------------|------------------------------|------------------------------|--------------------|--------------------|
|              |       | µg m <sup>-3</sup> | µg m <sup>-3</sup> | µg m <sup>-3</sup> | µg m <sup>-3</sup>            | µg m <sup>-3</sup>           | µg m <sup>-3</sup>           | µg m <sup>-3</sup> |                    |
| Xi'an        | 2003  | 356                | 153.3              | 21.5               | 53.8                          | 29.2                         | 29.6                         | 68.9               | Cao et al., 2012   |
|              | 2006  | 230                | 57.4               | 11.4               | 45.9                          | 20.6                         | 14.2                         | 80.0               | Xu et al., 2016    |
|              | 2008  | 199                | 48.3               | 9.9                | 42.5                          | 20.8                         | 11.0                         | 66.9               | Xu et al., 2016    |
|              | 2010  | 233                | 60.0               | 14.7               | 30.6                          | 22.9                         | 12.3                         | 92.8               | Xu et al., 2016    |
|              | 2012  | 196                | 56.3               | 8.2                | 27.0                          | 19.2                         | 13.3                         | 71.9               | Zhang et al., 2015 |
|              | 2013  | 263                | 45.8               | 7.1                | 31.7                          | 29.2                         | 17.1                         | 132.5              | Niu et al., 2016   |
|              | 2014  | 156                | 57.4               | 2.5                | 16.2                          | 20.6                         | 9.4                          | 49.7               | Dai et al., 2018   |
|              | 2018  | 189                | 42.1               | 4.9                | 9.7                           | 14.5                         | 6.6                          | 111.0              | Wang et al., 2022  |
| 2020*        | 77    | 25.9               | 4.5                | 5.2                | 18.5                          | 6.2                          | 16.2                         | This study         |                    |
| Shijiazhuang | 2010  | 227                | 75.6               | 12.2               | 33.2                          | 25.3                         | 10.5                         | 70.2               | Zhao et al., 2013  |
|              | 2015  | 232                | 82.0               | 16.3               | 26.6                          | 27.4                         | 19.8                         | 59.7               | Huang et al., 2017 |
|              | 2016  | 193                | 63.2               | 13.5               | 29.5                          | 24.0                         | 17.0                         | 45.8               | Liu et al., 2019   |
|              | 2017  | 97                 | 31.2               | 6.5                | 12.5                          | 16.5                         | 12.5                         | 17.8               | Liu et al., 2019   |
|              | 2018  | 96                 | 35.8               | 10.1               | 10.5                          | 15.3                         | 6.3                          | 18.0               | Zhang et al., 2020 |
|              | 2022* | 60                 | 16.0               | 3.9                | 7.0                           | 15.8                         | 7.0                          | 9.8                | This study         |
| Beijing      | 2001  | 122                | 51.5               | 11.3               | 9.9                           | 10.7                         | 7.1                          | 31.5               | Duan et al., 2006  |
|              | 2003  | 116                | 38.2               | 6.2                | 20.0                          | 13.1                         | 9.4                          | 29.1               | Cao et al., 2012   |
|              | 2004  | 107                | 53.8               | 8.3                | 12.7                          | 8.3                          | 6.0                          | 17.9               | Song et al., 2007  |
|              | 2010  | 127                | 42.9               | 7.1                | 14.2                          | 17.1                         | 5.2                          | 40.5               | Zhao et al., 2013  |
|              | 2013  | 132                | 38.5               | 6.4                | 21.9                          | 18.5                         | 15.1                         | 31.6               | Tao et al., 2015   |
|              | 2014  | 138                | 46.4               | 5.2                | 21.0                          | 26.0                         | 14.1                         | 25.3               | Ma et al., 2017    |
|              | 2016  | 130                | 75.7               | 20.2               | 12.3                          | 5.5                          | 10.5                         | 5.3                | Xu et al., 2018    |
|              | 2021* | 64                 | 22.1               | 1.9                | 9.6                           | 15.2                         | 9.2                          | 6.4                | This study         |

139 \* study was conducted on online monitoring equipment, and the rest studies were researched on filter sampling experiments.

140 <sup>a</sup> Assumption of OA = 1.6 × OC for the filter-based sampling experiments

141 **Table S7.** The concentration of PM<sub>2.5</sub> and its source contribution during wintertime in Xi'an, Shijiazhuang, and  
 142 Beijing in the last decades.

| City         | Year  | PM <sub>2.5</sub><br>μg m <sup>-3</sup> | Vehicle<br>emission<br>μg m <sup>-3</sup> | Coal<br>combustion<br>μg m <sup>-3</sup> | Secondary<br>source<br>μg m <sup>-3</sup> | Fugitive<br>dust<br>μg m <sup>-3</sup> | Industrial<br>emission<br>μg m <sup>-3</sup> | Biomass<br>burning<br>μg m <sup>-3</sup> | Others<br>μg m <sup>-3</sup> | References         |
|--------------|-------|-----------------------------------------|-------------------------------------------|------------------------------------------|-------------------------------------------|----------------------------------------|----------------------------------------------|------------------------------------------|------------------------------|--------------------|
| Xi'an        | 2006  | 392                                     | 74.5                                      | 121.5                                    | 82.3                                      | 51.0                                   | 39.2                                         | 23.5                                     |                              | Xu et al., 2016    |
|              | 2008  | 199                                     | 41.8                                      | 55.7                                     | 45.8                                      | 23.9                                   | 21.9                                         | 10.0                                     |                              | Xu et al., 2016    |
|              | 2010  | 233                                     | 48.9                                      | 55.9                                     | 41.9                                      | 44.3                                   | 30.3                                         | 11.7                                     |                              | Xu et al., 2016    |
|              | 2014  | 169                                     | 20.3                                      | 47.3                                     | 71.0                                      | 8.5                                    | 6.8                                          | 15.2                                     |                              | Dai et al., 2020   |
|              | 2018  | 189                                     | 26.5                                      | 28.4                                     |                                           | 15.1                                   | 22.7                                         | 58.6                                     | 37.8                         | Wang et al., 2022  |
|              | 2020* | 77                                      | 10.0                                      | 11.6                                     | 24.6                                      | 6.2                                    | 6.2                                          | 19.3                                     |                              | This study         |
| Shijiazhuang | 2015  | 232                                     | 46.4                                      | 62.6                                     | 30.2                                      | 20.9                                   | 16.2                                         | 7.0                                      | 48.7                         | Huang et al., 2017 |
|              | 2016  | 181                                     | 23.5                                      | 54.3                                     | 54.3                                      | 30.8                                   | 9.1                                          |                                          | 7.2                          | Liu et al., 2018   |
|              | 2019  | 119                                     | 21.4                                      | 21.4                                     | 42.8                                      | 21.4                                   | 6.0                                          | 6.0                                      |                              | Diao et al., 2021  |
|              | 2022* | 60                                      | 7.2                                       | 9.6                                      | 22.8                                      | 2.4                                    | 3.0                                          | 14.4                                     |                              | This study         |
| Beijing      | 2004  | 107                                     | 8.6                                       | 40.7                                     | 19.3                                      | 7.5                                    |                                              | 16.1                                     | 15.0                         | Song et al., 2007  |
|              | 2010  | 139                                     |                                           | 79.2                                     | 8.3                                       | 22.2                                   | 16.7                                         | 9.7                                      | 2.8                          | Zhang et al., 2013 |
|              | 2013  | 159                                     | 9.5                                       | 41.3                                     | 79.5                                      | 15.9                                   |                                              | 9.5                                      | 3.2                          | Huang et al., 2014 |
|              | 2015  | 125                                     | 48.8                                      | 15.0                                     | 23.8                                      | 8.8                                    | 2.5                                          | 6.3                                      | 18.8                         | Huang et al., 2017 |
|              | 2021* | 64                                      | 7.0                                       | 5.8                                      | 33.3                                      | 2.6                                    | 2.6                                          | 11.5                                     | 1.3                          | This study         |

143 \* study was conducted on online monitoring equipment, and the rest studies were researched on filter sampling experiments.

144

145 **References:**

- 146 Cao, J.-J., Shen, Z.-X., Chow, J. C., Watson, J. G., Lee, S.-C., Tie, X.-X., Ho, K.-F., Wang, G.-H., and Han, Y.-M.: Winter  
147 and summer PM<sub>2.5</sub> chemical compositions in fourteen Chinese cities, *J. Air Waste Manage.*, 62, 1214–1226,  
148 <https://doi.org/10.1080/10962247.2012.701193>, 2012.
- 149 Dai, Q., Bi, X., Liu, B., Li, L., Ding, J., Song, W., Bi, S., Schulze, B. C., Song, C., Wu, J., Zhang, Y., Feng, Y., and Hopke,  
150 P. K.: Chemical nature of PM<sub>2.5</sub> and PM<sub>10</sub> in Xi'an, China: Insights into primary emissions and secondary particle  
151 formation, *Environ. Pollut.*, 240, 155–166, <https://doi.org/10.1016/j.envpol.2018.04.111>, 2018.
- 152 Dai, Q., Hopke, P. K., Bi, X., and Feng, Y.: Improving apportionment of PM<sub>2.5</sub> using multisite PMF by constraining G-  
153 values with a priori information, *Sci. Total Environ.*, 736, 139657, <https://doi.org/10.1016/j.scitotenv.2020.139657>,  
154 2020.
- 155 Diao, L., Zhang, H., Liu, B., Dai, C., Zhang, Y., Dai, Q., Bi, X., Zhang, L., Song, C., and Feng, Y.: Health risks of inhaled  
156 selected toxic elements during the haze episodes in Shijiazhuang, China: Insight into critical risk sources, *Environ.*  
157 *Pollut.*, 276, 116664, <https://doi.org/10.1016/j.envpol.2021.116664>, 2021.
- 158 Duan, F., He, K., Ma, Y., Yang, F., Yu, X., Cadle, S., Chan, T., and Mulawa, P.: Concentration and chemical characteristics  
159 of PM<sub>2.5</sub> in Beijing, China: 2001–2002, *Sci. Total Environ.*, 355, 264–275,  
160 <https://doi.org/10.1016/j.scitotenv.2005.03.001>, 2006.
- 161 Huang, R.-J., Zhang, Y., Bozzetti, C., Ho, K.-F., Cao, J.-J., Han, Y., Daellenbach, K. R., Slowik, J. G., Platt, S. M., Canonaco,  
162 F., Zotter, P., Wolf, R., Pieber, S. M., Bruns, E. A., Crippa, M., Ciarelli, G., Piazzalunga, A., Schwikowski, M.,  
163 Abbaszade, G., Schnelle-Kreis, J., Zimmermann, R., An, Z., Szidat, S., Baltensperger, U., Haddad, I. E., and Prévôt,  
164 A. S. H.: High secondary aerosol contribution to particulate pollution during haze events in China, *Nature*, 514, 218–  
165 222, <https://doi.org/10.1038/nature13774>, 2014.
- 166 Huang, X., Liu, Z., Liu, J., Hu, B., Wen, T., Tang, G., Zhang, J., Wu, F., Ji, D., Wang, L., and Wang, Y.: Chemical  
167 characterization and source identification of PM<sub>2.5</sub> at multiple sites in the Beijing–Tianjin–Hebei region, China, *Atmos.*  
168 *Chem. Phys.*, 17, 12941–12962, <https://doi.org/10.5194/acp-17-12941-2017>, 2017.
- 169 Liu, B., Cheng, Y., Zhou, M., Liang, D., Dai, Q., Wang, L., Jin, W., Zhang, L., Ren, Y., Zhou, J., Dai, C., Xu, J., Wang, J.,  
170 Feng, Y., and Zhang, Y.: Effectiveness evaluation of temporary emission control action in 2016 in winter in  
171 Shijiazhuang, China, *Atmos. Chem. Phys.*, 18, 7019–7039, <https://doi.org/10.5194/acp-18-7019-2018>, 2018.
- 172 Liu, G., Xin, J., Wang, X., Si, R., Ma, Y., Wen, T., Zhao, L., Zhao, D., Wang, Y., and Gao, W.: Impact of the coal banning  
173 zone on visibility in the Beijing–Tianjin–Hebei region, *Sci. Total Environ.*, 692, 402–410,  
174 <https://doi.org/10.1016/j.scitotenv.2019.07.006>, 2019.
- 175 Liu, H., Wang, Q., Ye, J., Su, X. li, Zhang, T., Zhang, Y., Tian, J., Dong, Y., Chen, Y., Zhu, C., Han, Y., and Cao, J.: Changes  
176 in Source-Specific Black Carbon Aerosol and the Induced Radiative Effects Due to the COVID-19 Lockdown,  
177 *Geophys. Res. Lett.*, 48, <https://doi.org/10.1029/2021GL092987>, 2021.

178 Ma, Q., Wu, Y., Tao, J., Xia, Y., Liu, X., Zhang, D., Han, Z., Zhang, X., and Zhang, R.: Variations of Chemical Composition  
179 and Source Apportionment of PM<sub>2.5</sub> during Winter Haze Episodes in Beijing, *Aerosol Air Qual. Res.*, 17, 2791–2803,  
180 <https://doi.org/10.4209/aaqr.2017.10.0366>, 2017.

181 Niu, X., Cao, J., Shen, Z., Ho, S. S. H., Tie, X., Zhao, S., Xu, H., Zhang, T., and Huang, R.: PM<sub>2.5</sub> from the Guanzhong  
182 Plain: Chemical composition and implications for emission reductions, *Atmos. Environ.*, 147, 458–469,  
183 <https://doi.org/10.1016/j.atmosenv.2016.10.029>, 2016.

184 Rai, P., Furger, M., Slowik, J. G., Canonaco, F., Fröhlich, R., Hüglin, C., Minguillón, M. C., Petterson, K., Baltensperger,  
185 U., and Prévôt, A. S. H.: Source apportionment of highly time-resolved elements during a firework episode from a  
186 rural freeway site in Switzerland, *Atmos. Chem. Phys.*, 20, 1657–1674, <https://doi.org/10.5194/acp-20-1657-2020>,  
187 2020.

188 Salameh, D., Pey, J., Bozzetti, C., El Haddad, I., Detournay, A., Sylvestre, A., Canonaco, F., Armengaud, A., Piga, D.,  
189 Robin, D., Prevot, A. S. H., Jaffrezo, J.-L., Wortham, H., and Marchand, N.: Sources of PM<sub>2.5</sub> at an urban-industrial  
190 Mediterranean city, Marseille (France): Application of the ME-2 solver to inorganic and organic markers, *Atmos. Res.*,  
191 214, 263–274, <https://doi.org/10.1016/j.atmosres.2018.08.005>, 2018.

192 Salameh, T., Sauvage, S., Afif, C., Borbon, A., and Locoge, N.: Source apportionment vs. emission inventories of non-  
193 methane hydrocarbons (NMHC) in an urban area of the Middle East: local and global perspectives, *Atmos. Chem.*  
194 *Phys.*, 16, 3595–3607, <https://doi.org/10.5194/acp-16-3595-2016>, 2016.

195 Song, Y., Tang, X., Xie, S., Zhang, Y., Wei, Y., Zhang, M., Zeng, L., and Lu, S.: Source apportionment of PM<sub>2.5</sub> in Beijing  
196 in 2004, *J. Hazard. Mater.*, 146, 124–130, <https://doi.org/10.1016/j.jhazmat.2006.11.058>, 2007.

197 Tao, J., Zhang, L., Gao, J., Wang, H., Chai, F., and Wang, S.: Aerosol chemical composition and light scattering during a  
198 winter season in Beijing, *Atmos. Environ.*, 110, 36–44, <https://doi.org/10.1016/j.atmosenv.2015.03.037>, 2015.

199 Wang, Z., Wang, R., Wang, J., Wang, Y., McPherson Donahue, N., Tang, R., Dong, Z., Li, X., Wang, L., Han, Y., and Cao,  
200 J.: The seasonal variation, characteristics and secondary generation of PM<sub>2.5</sub> in Xi'an, China, especially during  
201 pollution events, *Environ. Res.*, 212, 113388, <https://doi.org/10.1016/j.envres.2022.113388>, 2022.

202 Xu, H., Cao, J., Chow, J. C., Huang, R.-J., Shen, Z., Chen, L. W. A., Ho, K. F., and Watson, J. G.: Inter-annual variability  
203 of wintertime PM<sub>2.5</sub> chemical composition in Xi'an, China: Evidences of changing source emissions, *Sci. Total*  
204 *Environ.*, 545–546, 546–555, <https://doi.org/10.1016/j.scitotenv.2015.12.070>, 2016.

205 Xu, X., Zhang, H., Chen, J., Li, Q., Wang, X., Wang, W., Zhang, Q., Xue, L., Ding, A., and Mellouki, A.: Six sources  
206 mainly contributing to the haze episodes and health risk assessment of PM<sub>2.5</sub> at Beijing suburb in winter 2016,  
207 *Ecotoxicol. Environ. Saf.*, 166, 146–156, <https://doi.org/10.1016/j.ecoenv.2018.09.069>, 2018.

208 Zhang, Q., Shen, Z., Cao, J., Zhang, R., Zhang, L., Huang, R.-J., Zheng, C., Wang, L., Liu, S., Xu, H., Zheng, C., and Liu,  
209 P.: Variations in PM<sub>2.5</sub>, TSP, BC, and trace gases (NO<sub>2</sub>, SO<sub>2</sub>, and O<sub>3</sub>) between haze and non-haze episodes in winter  
210 over Xi'an, China, *Atmos. Environ.*, 112, 64–71, <https://doi.org/10.1016/j.atmosenv.2015.04.033>, 2015.

- 211 Zhang, R., Jing, J., Tao, J., Hsu, S.-C., Wang, G., Cao, J., Lee, C. S. L., Zhu, L., Chen, Z., Zhao, Y., and Shen, Z.: Chemical  
212 characterization and source apportionment of PM<sub>2.5</sub> in Beijing: seasonal perspective, *Atmos. Chem. Phys.*, 13, 7053–  
213 7074, <https://doi.org/10.5194/acp-13-7053-2013>, 2013.
- 214 Zhang, W., Liu, B., Zhang, Y., Li, Y., Sun, X., Gu, Y., Dai, C., Li, N., Song, C., Dai, Q., Han, Y., and Feng, Y.: A refined  
215 source apportionment study of atmospheric PM<sub>2.5</sub> during winter heating period in Shijiazhuang, China, using a  
216 receptor model coupled with a source-oriented model, *Atmos. Environ.*, 222, 117157,  
217 <https://doi.org/10.1016/j.atmosenv.2019.117157>, 2020.
- 218 Zhao, P. S., Dong, F., He, D., Zhao, X. J., Zhang, X. L., Zhang, W. Z., Yao, Q., and Liu, H. Y.: Characteristics of  
219 concentrations and chemical compositions for PM<sub>2.5</sub> in the region of Beijing, Tianjin, and Hebei, China, *Atmos. Chem.*  
220 *Phys.*, 13, 4631–4644, <https://doi.org/10.5194/acp-13-4631-2013>, 2013.
