# Supplementary material for: High-time-resolution chemical composition and source apportionment of PM 2.5 in northern Chinese cities: implications for policy
Source: Copernicus journal article supplement (doi:10.5194/egusphere-2023-457), 2023-04-17
Supplement: Supplementary file [file egusphere-2023-457-AC1-supplement.pdf]

## Responses to Referee #1:

This manuscript discussed chemical composition and source apportionment of PM<sub>2.5</sub> in three northern Chinese cities based on high-time-resolution monitoring equipment. Furthermore, the authors qualitatively explored the mechanisms of secondary aerosols formation. And the authors also compared the changes in the chemical composition and sources of PM<sub>2.5</sub> in the three pilot cities over past decades. At the end of the article, the authors provided policy recommendations for sustained air quality improvement in the future. In general, this article provides valuable data for local governments to develop scientific pollution control strategies. I recommend this article for publication on Atmospheric Chemistry and Physics. However, some issues should be addressed before the publication.

**Response:** We kindly appreciate the reviewer to providing those valuable comments and suggestions to our paper. We have carefully revised the relevant contents. We do believe that the revised manuscript has been significantly improved after the revision. The point-to-point responses to each comment are provided in blue, and the revised content is underlined in italics. Attached please also find the marked-up manuscript with tracked changes in the revised manuscript.

## Major comments:

**Comments (1):** In Text S1 from supplement, the error fraction of all chemical species was used to 10% for calculation of uncertainty dataset inputted receptor model. Is it reasonable to choose the same error fraction for different instruments?

**Response:** Thank you for pointing out this problem. The error fraction value was normally calculated by parallel sample analysis, which can be achieved from off-line experiments. However, our campaigns were conducted by online instruments, the parallel test cannot be conducted due to limitation of instruments. For high time- resolution source apportionment, the value of error fraction was set from 0.05-0.5 (Yang et al., 2022). And the 10% for all species was been widely used to calculate the uncertainty dataset for source apportionment by receptor model in previous several studies (Liu et al., 2016; Ji et al., 2018; Rai et al., 2020; Wu et al., 2020; Liu et al., 2021; Tian et al., 2022), and those all did not impact the interpretability of the source identification. Therefore, the 10% for error fraction was chosen to calculate the uncertainty data set in this study.

## References:

Ji, D., Cui, Y., Li, L., He, J., Wang, L., Zhang, H., Wang, W., Zhou, L., Maenhaut, W., Wen, T., and Wang, Y.: Characterization and source identification of fine particulate matter in urban Beijing during the 2015 Spring Festival, *Sci. Total Environ.*, 430–440, 628–629, <https://doi.org/10.1016/j.scitotenv.2018.01.304>, 2018.

- Liu, B., Liang, D., Yang, J., Dai, Q., Bi, X., Feng, Y., Yuan, J., Xiao, Z., Zhang, Y., Xu, H.: Characterization and source apportionment of volatile organic compounds based on 1-year of observational data in Tianjin, China. *Environ. Pollut.* 218, 757–769, <https://doi.org/10.1016/j.envpol.2016.07.072>, 2016
- Liu, H., Wang, Q., Ye, J., Su, X., Zhang, T., Zhang, Y., Tian, J., Dong, Y., Chen, Y., Zhu, C., Han, Y., Cao, J. J.: Changes in Source-Specific Black Carbon Aerosol and the Induced Radiative Effects Due to the COVID-19 Lockdown. *Geophys. Res. Lett.*, 48: e2021GL092987, 2021.
- Rai, P., Furger, M., Slowik, J., Canonaco, F., Prévôt, A.: Source apportionment of highly time-resolved elements during a firework episode from a rural freeway site in Switzerland. *Atmospheric Chemistry and Physics*, 20(3), 1657–1674. <https://doi.org/10.5194/acp-20-1657-2020>, 2020
- Tian, J., Wang, Q., Liu, H., Ma, Y., Liu, S., Zhang, Y., Ran, W., Han, Y., and Cao, J.: Measurement report: The importance of biomass burning in light extinction and direct radiative effect of urban aerosol during the COVID-19 lockdown in Xi'an, China, *Atmos. Chem. Phys.*, 22, 8369–8384, <https://doi.org/10.5194/acp-22-8369-2022>, 2022.
- Wu, R., Zhao, Y., Zhang, J., Zhang, L.: Variability and Sources of Ambient Volatile Organic Compounds Based on Online Measurements in a Suburban Region of Nanjing, Eastern China. *Aerosol Air Qual. Res.* 20, 606-619, <https://doi.org/10.4209/AAQR.2019.10.0517>, 2020.
- Yang Y., Liu B., Hua J., Yang T., Dai Q., Wu J., Feng Y., Hopke P.: Global review of source apportionment of volatile organic compounds based on highly time-resolved data from 2015 to 2021, *Sci. Total Environ.*, 165, 107330, <https://doi.org/10.1016/j.envint.2022.107330>, 2022.

**Comments (2):** In Sect3.2, the secondary sources from three cities were resolved by HERM model. And one factor named secondary nitrate plus sulfate was identified in Xi'an and Shijiazhuang (Fig. S6 and S7), but two factors named secondary nitrate and secondary sulfate were identified in Beijing (Fig. S8). What causes such differences in sources identification among cities? Moreover, the secondary sources were characterized by high EV values for SO<sub>4</sub><sup>2-</sup>, NO<sub>3</sub><sup>-</sup>, NH<sub>4</sub><sup>+</sup>, and those three species are inorganic aerosols. Secondary organic aerosols (SOA) were not identified in this study, dose SOA was ignored in this study?

**Response:** (a) Thank you for pointing out this out. The factor number for optimal solution of receptor model was depended on characteristics of data set inputted model (Chen et al., 2010). So, it is not unusual for the number of factors to vary in different cities. Although two factors about secondary source were identified in Beijing, the source characteristics reflected by these two factors together are equivalent those reflected by one factor in Xi'an and Shijiazhuang. And we also point out this in manuscript (see section 3.2).

(b) Due to lack of critical tracers of SOA in this study, the sources of SOA cannot be individually resolved by receptor model. In this study, the secondary sources were mainly characterized by high EV values for inorganic aerosols such as SO<sub>4</sub><sup>2-</sup>, NO<sub>3</sub><sup>-</sup>, NH<sub>4</sub><sup>+</sup>, but the medium EV values for OA (16~29%) were also presented on secondary sources in three pilot cities. This means that the SOA maybe mixed in with the factors of secondary sources. To

verify this, we estimated the SOA concentrations using a BC-tracer method (Wang et al., 2019) and then compared the results with those based on source apportionment. The formula of SOA calculation based on BC-tracer method was shown as follow:

$$[\text{SOA}]_{\text{BC-tracer}} = [\text{OA}] - (\text{OA/BC})_{\text{pri}} \times [\text{BC}] \quad (\text{R-1})$$

where [ ] means mass concentration,  $(\text{OA/BC})_{\text{pri}}$  is the ratio of [OA] to [BC] in primary emission. The  $(\text{OA/BC})_{\text{pri}}$  ratios vary among sources, therefore, a minimum R squared (MRS) method was used to derive appropriate  $(\text{OA/BC})_{\text{pri}}$  values for three pilot cities. In previous studies (Srivastava et al., 2018; Wang et al., 2019), MRS method has been used to calculate the concentration of secondary organic carbon and brown carbon. Detailed information on the method and a validation of this approach can be found in Wang et al. (2019).

In addition, according to source apportionment results, SOA concentration can also be estimated as follows based on EV values of OA from secondary source factors

$$[\text{SOA}]_{\text{source apportionment}} = [\text{OA}] \times \text{EV}_{\text{OA}} \quad (\text{R-2})$$

where  $\text{EV}_{\text{OA}}$  represents the EV values of OA in secondary source factors resolved by the HERM model.

As shown in Fig. R1, the  $(\text{OA/BC})_{\text{pri}}$  ratios were determined as 4.73 for Xi'an, 3.12 for Shijiazhuang and 7.6 for Beijing, respectively. Furthermore, the concentrations of SOA from three pilot cities were shown in Table R1 based on two different methods. As we can see, the SOA concentrations estimated by EV values of OA are close to that by the BC-tracer method for three pilot cities. This indicates that SOA was mixed in secondary source factors.

To avoid unnecessary misunderstanding to the readers, we re-named the source of secondary nitrate plus sulfate as secondary formation source, secondary nitrate as secondary nitrate plus OA, and secondary sulfate as secondary sulfate plus OA, respectively in the revised manuscript.

The main changes about identification of secondary source were revised as follows:

“The secondary sources resolved by HERM are different among the three cities. In Xi'an and Shijiazhuang, this factor are characterized by high EV values for  $\text{SO}_4^{2-}$  (62–75%),  $\text{NO}_3^-$  (55–53%),  $\text{NH}_4^+$  (60–56%) and a medium EV value for OA (23–29%), which showed good correlations with  $\text{SO}_4^{2-}$  ( $R^2 = 0.85\text{--}0.90$ ) and  $\text{NO}_3^-$  ( $R^2 = 0.85\text{--}0.92$ ) (Dai et al., 2020; Tian et al., 2022). In addition, the OA concentration in this factor was calculated by the EV value of OA, which was close to the secondary OA (SOA) concentration estimated by the BC-tracer method (see Text S3 and Table S6). This means that SOA was mixed in this factor, therefore, this factor was identified as secondary formation source. In Beijing, two secondary sources were resolved. The first one was characterized by high EV value for  $\text{NO}_3^-$  (58%),  $\text{NH}_4^+$  (42%) and medium

values for OA (21%), another one was characterized by high EV value for  $\text{SO}_4^{2-}$  (58%), and medium values for OA (16%),  $\text{NH}_4^+$  (30%). The OA concentration in those two factors was also comparable to that estimated by BC-trace method (see Text S3). So, those two sources were identified as secondary nitrate plus OA and secondary sulfate plus OA, respectively. The combination of secondary nitrate plus OA and secondary sulfate plus OA is equivalent to the secondary formation source for next discussion.” (Page 10 Line 270–283)

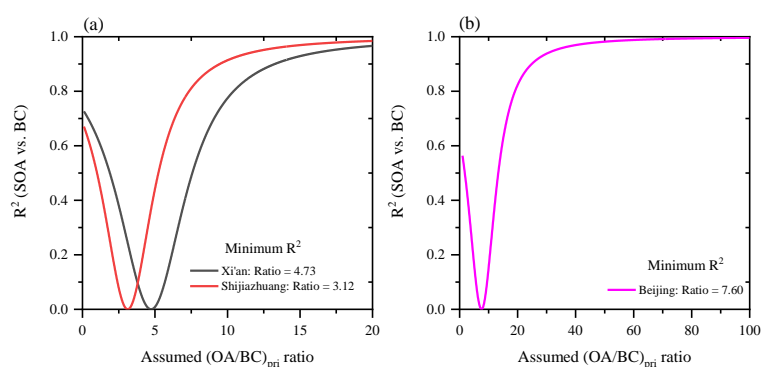

Figure R1. Coefficients of determination ( $R^2$ ) for SOA versus BC mass concentration plotted against assumed ratios for OA to BC in primary emissions ( $(\text{OA}/\text{BC})_{\text{pri}}$ ).

Table R1 Average concentrations of SOA in Xi'an, Shijiazhuang, and Beijing during sampling periods estimated by BC-tracer method and source apportionment results ( $\mu\text{g m}^{-3}$ )

| SOA                      | Xi'an         | Shijiazhuang  | Beijing       |
|--------------------------|---------------|---------------|---------------|
| SOA_BC-tracer            | $5.1 \pm 5.8$ | $4.2 \pm 4.4$ | $8.0 \pm 9.0$ |
| SOA_source apportionment | $6.0 \pm 4.1$ | $4.6 \pm 2.8$ | $8.2 \pm 6.7$ |

#### References:

- Chen, L., Lowenthal, D., Watson, J., Koracin, D., Kumar, N., Knipping, E., Wheeler, N., Craig, K., Reid, S.: Toward effective source apportionment using positive matrix factorization: experiments with simulated  $\text{PM}_{2.5}$  data. *J. Air Waste Manage.*, 60(1), 43–54, <https://doi.org/10.3155/1047-3289.60.1.43>, 2010.
- Wang, Q.; Han, Y.; Ye, J.; Liu, S.; Pongpiachan, S.; Zhang, N.; Han, Y.; Tian, J.; Wu, C.; Long, X.; Zhang, Q.; Zhang, W.; Zhao, Z.; Cao, J.: High Contribution of secondary brown carbon to aerosol light absorption in the southeastern margin of Tibetan Plateau. *Geophys. Res. Lett.* 46, 4962–4970, <https://doi.org/10.1029/2019GL082731>, 2019.
- Shrivastava, M., Cappa, C., Fan, J., Goldstein, A., Guenther, A., Jimenez, J., Kuang, C., Laskin, A., Martin S., Ng, N., Petaja, T., Pierce, J., Rasch, P., Roldin, P., Senfeld, J., Shiling, J., Smith, J., Thornton, J., Volkamer, R., Wang, J., Worsnop, D., Zaveri, R., Zelenyuk, A., Zhang, Q.: secondary organic aerosol: Implications for global climate forcing. *Rev. Geophys.*, 55, 509–559. <https://doi.org/10.1002/2016RG000540>, 2017.

**Comments (3):** In Sect3.3, the authors explored the potential function of aqueous-phase reaction to secondary aerosol formation based on data during nighttime. It should be noted that aqueous-phase reaction may also promote secondary aerosol formation during daytime. I suggest that the authors take the data from daytime hours into account when discussing the role

of the aqueous-phase reaction.

**Response:** Thanks for reviewer’s wonderful suggestion. We investigated the correlations of secondary formation source/ $\Delta$ CO ration and ALWC based on data during daytime (08:00–17:00 LST). As shown in Fig. R2a-c, the secondary formation source/ $\Delta$ CO also showed a significant linear correlation to ALWC ( $R^2 = 0.84–0.98$ ) when  $RH < 80\%$ , this indicated that the aqueous-phase reaction on the secondary aerosol formation also occurred during the daytime. Therefore, the functions of aqueous-phase reaction to the secondary aerosol formation in three pilot cities were re-evaluated by all data during sampling periods in revised manuscript.

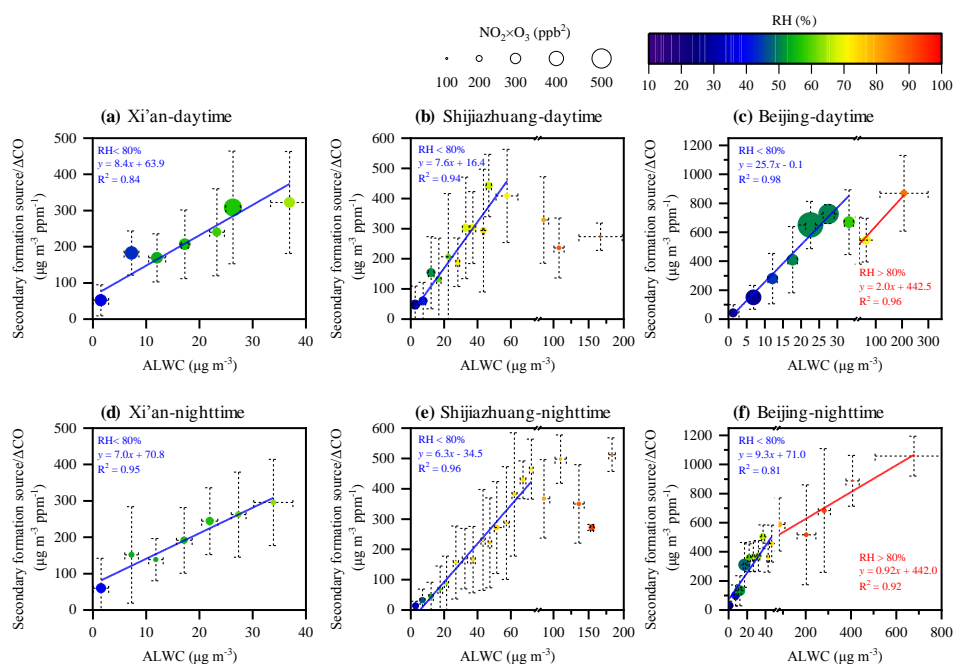

**Figure R2.** Correlation of secondary formation source/ $\Delta$ CO and ALWC during daytime (08:00–17:00 LST, a–c) and nighttime (18:00–7:00 the next day LST, d–f) in Xi’an, Shijiazhuang, and Beijing, respectively. The points and error bar represent the mean values and standard deviation values of secondary formation source / $\Delta$ CO and ALWC in each bin. In Xi’an, each bin is  $5 \mu\text{g m}^{-3}$  ( $\Delta\text{ALWC} = 5 \mu\text{g m}^{-3}$ ). In Shijiazhuang, each bin is  $5 \mu\text{g m}^{-3}$  ( $\Delta\text{ALWC} = 5 \mu\text{g m}^{-3}$ ) when ALWC ranged from 0 to  $75 \mu\text{g m}^{-3}$ , but  $25 \mu\text{g m}^{-3}$  ( $\Delta\text{ALWC} = 25 \mu\text{g m}^{-3}$ ) for ALWC ranged from  $75$  to  $200 \mu\text{g m}^{-3}$  due to limitations in data. In Beijing, during daytime, each bin is  $5 \mu\text{g m}^{-3}$  ( $\Delta\text{ALWC} = 5 \mu\text{g m}^{-3}$ ) when ALWC ranged from 0 to  $40 \mu\text{g m}^{-3}$ , but  $100 \mu\text{g m}^{-3}$  ( $\Delta\text{ALWC} = 100 \mu\text{g m}^{-3}$ ) for ALWC ranged from  $40$  to  $450 \mu\text{g m}^{-3}$  due to limitations in data. During nighttime, each bin is  $5 \mu\text{g m}^{-3}$  ( $\Delta\text{ALWC} = 5 \mu\text{g m}^{-3}$ ) when ALWC ranged from 0 to  $50 \mu\text{g m}^{-3}$ , but  $100 \mu\text{g m}^{-3}$  ( $\Delta\text{ALWC} = 100 \mu\text{g m}^{-3}$ ) for ALWC ranged from  $50$  to  $900 \mu\text{g m}^{-3}$  due to limitations in data.

In the revised manuscript, Figure 4 was replaced by Figure R3.

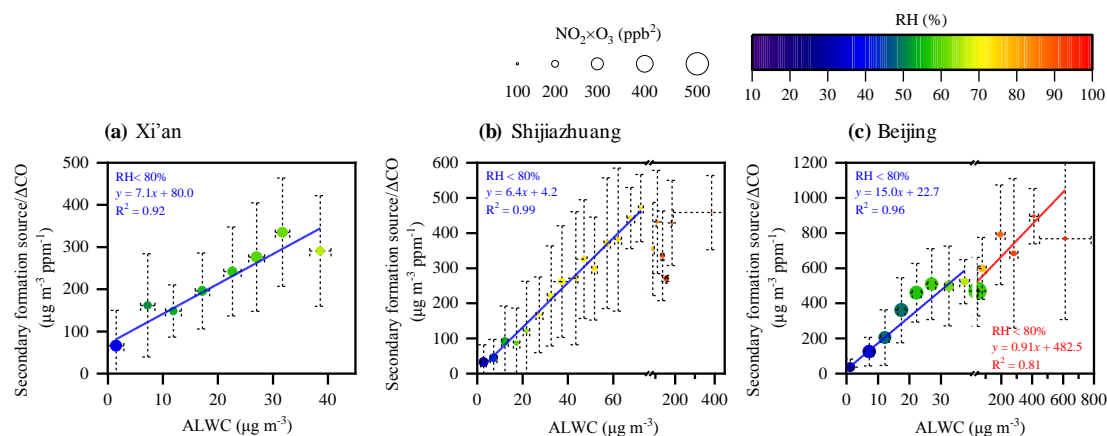

**Figure R3.** Correlation of secondary formation source/ $\Delta$ CO and ALWC during sampling periods in (a) Xi'an, (b) Shijiazhuang, and (c) Beijing, respectively. The points and error bar represent the mean values and standard deviation values of secondary formation source / $\Delta$ CO and ALWC in each bin. In Xi'an, each bin is  $5 \mu\text{g m}^{-3}$  ( $\Delta$ ALWC =  $5 \mu\text{g m}^{-3}$ ). In Shijiazhuang, each bin is  $5 \mu\text{g m}^{-3}$  ( $\Delta$ ALWC =  $5 \mu\text{g m}^{-3}$ ) when ALWC ranged from 0 to  $75 \mu\text{g m}^{-3}$ , but  $25 \mu\text{g m}^{-3}$  ( $\Delta$ ALWC =  $25 \mu\text{g m}^{-3}$ ) for ALWC ranged from 75 to  $200 \mu\text{g m}^{-3}$  due to limitations in data. In Beijing, each bin is  $5 \mu\text{g m}^{-3}$  ( $\Delta$ ALWC =  $5 \mu\text{g m}^{-3}$ ) when ALWC ranged from 0 to  $50 \mu\text{g m}^{-3}$ , but  $100 \mu\text{g m}^{-3}$  ( $\Delta$ ALWC =  $100 \mu\text{g m}^{-3}$ ) for ALWC ranged from 50 to  $900 \mu\text{g m}^{-3}$  due to limitations in data.

The relevant contents in section 3.3 were revised as follows:

“The aqueous-phase reaction is another important pathway for secondary aerosol formation in the atmosphere (Wang et al., 2018; Xue et al., 2014). ALWC is considered an indicator of an aqueous-phase reaction (Ervens et al., 2011). Considering that the aqueous-phase reaction occurs both during the daytime and nighttime characterized by good correlations between secondary formation source/ $\Delta$ CO and ALWC ( $R^2 = 0.81$ – $0.98$ , Fig. S14). The correlations of secondary formation source/ $\Delta$ CO ratio and ALWC during all sampling periods were re-established in three pilot cities to assess the implications of aqueous-phase chemistry for secondary aerosol production. As shown in Fig. 4, the secondary formation source/ $\Delta$ CO showed a significant linear correlation to ALWC ( $R^2 = 0.92$ – $0.99$ ) when  $RH < 80\%$ , indicating an obvious effect of aqueous-phase reaction on the secondary aerosol formation during the sampling periods. However, when  $RH > 80\%$ , the secondary formation source/ $\Delta$ CO showed no notable increase with ALWC in Shijiazhuang (Fig. 4b), whereas a tiny increase with ALWC in Beijing (Fig. 4c). The higher ALWC at  $RH > 80\%$  probably inhibits secondary aerosol formation due to the decrease in aerosol acidity (Huang et al., 2019; Meng et al., 2014). Khan et al. (2008) found that  $\text{NO}_3$  radicals can rapidly generate from the reaction between  $\text{NO}_2$  and  $\text{O}_3$  with unsaturated organic species during nighttime. The value of  $\text{O}_3 \times \text{NO}_2$  can thus represent its production reaction rate or be used as a proxy for the  $\text{NO}_3$  radical. The highest  $\text{NO}_3$  radical production rate was found in Beijing, followed by Xi'an and Shijiazhuang, when  $RH < 80\%$ . This could be used to explain the highest contribution of secondary formation source to  $\text{PM}_{2.5}$

in Beijing during the daytime and nighttime (Fig. S13). Moreover, the results showed that both photochemical oxidation and aqueous-phase reaction play more important roles in Beijing, where the primary sources have been better controlled. This reflects that pollution control policies need to be focused on the suppression of secondary formations” (Page 11,12 Line 334–353)

### **Specific Comments:**

**Comments (4):** line18 & 352: change “progress of” to “process of”

**Response:** We have corrected the relevant sentences as follows:

“In this study, intensive real-time measurement campaigns were conducted in Xi’an, Shijiazhuang, and Beijing to investigate the chemical characteristics and source contributions of PM<sub>2.5</sub> and explored the formation of heavy pollution for policy implications.” (Page 1 Line 16–18)

“To gain insights into the process of pollution episodes, three typical pollution events were chosen for detailed discussion (i.e., EP2 in Xi’an, EP4 in Shijiazhuang, and EP7 in Beijing) based on the validity and integrity of the data and the representativeness of the selected pollution events.” (Page 14 Line 369–371)

**Comments (5):** line 22-23: change "but is no longer important contributor...." to "but is no longer an important contributor...."

**Response:** We have added an indefinite article of to this sentence as follows:

“The contribution of coal combustion to PM<sub>2.5</sub> is non-negligible in Xi’an and Shijiazhuang but is no longer an important contributor in the capital city of Beijing due to the execution of a strict coal-banning policy.” (Page 1 Line 22–24)

**Comments (6):** line 27: change “According to source variations, to “According to sources variations,”

**Response:** We have corrected the relevant sentence as follows:

“According to sources variations, air pollution events that occurred in campaigns were classified into three types: biomass combustion dominated, secondary formation source dominated, and a combination of primary and secondary sources.” (Page 1 Line 27–30)

**Comments (7):** line 49: change “In perspective of PM2.5 sources” to “In terms of PM2.5 sources”

**Response:** We have changed “In perspective of PM<sub>2.5</sub> sources” to “In terms of PM<sub>2.5</sub> sources” as follows:

“In terms of PM<sub>2.5</sub> sources, contribution of secondary source increased obviously while contribution of industrial emission and coal combustion decreased due to elimination of industries and enterprises with high pollutant emissions, promotion of desulfurization in industrial facilities, replacement of clean energy, and optimization of industrial and energy structures (Lu et al., 2021; Ma et al., 2022; Tao et al., 2017; Wang et al., 2019).” (Page 2 Line 50–54)

**Comments (8):** line 67: change “Liu et. al (2019)” to “Liu et al. (2019)”

**Response:** Corrected. (Page 2 Line 68)

**Comments (9):** line 73: change “should be pointed out previous researches” to “should be pointed out that previous studies”

**Response:** We have corrected the relevant sentence as follows:

“It should be pointed out that previous researches were mainly focused on individual cities, and those results have some limitations in guiding the improvement of air quality in the entire northern region of China.” (Page 3 Line 73–75)

**Comments (10):** line 78 & 85-86: change “are located to” to “are located in”

**Response:** We have corrected the relevant sentence as follows:

“The cities of Beijing and Shijiazhuang are located in the North China Plain, which is one of the most polluted regions in China (Chan and Yao, 2008).” (Page 3 Line 79–80)

“Xi’an is located in the Fenwei Plain, which is a region that suffered from heavy pollution and was designated as a key region for TAPFAP in 2018 (Cao and Cui, 2021).” (Page 3 Line 87–88)

**Comments (11):** line 237: change “With increasing of the PM<sub>2.5</sub> mass concentration” to “With increases of the PM<sub>2.5</sub> mass concentration”

**Response:** We have corrected the relevant sentence as follows:

“With increases of the PM<sub>2.5</sub> mass concentration, the fractions of chemical components in Xi’an and Shijiazhuang changed notably.” (Page 9 Line 238–239)

**Comments (12):** line 431&454: change “atmosphere oxidation capacity” to “atmospheric oxidation capacity”



**Response:** We have corrected the relevant sentences as follows:

“Therefore, more control measures should focus on weakening the atmospheric oxidation capacity, such as reduction of O<sub>3</sub> formation, to reduce the formation of secondary pollutants which are now identified as the most critical drivers of pollution.” *(Page 16,17 Line 453–456)*

“Furthermore, to weaken the atmospheric oxidation capacity for reducing the contribution of secondary formation source, it is necessary to promote the collaborative control on ozone and particulate matter.” *(Page 17 Line 477–479)*

# 1 **High-time-resolution chemical composition and source apportionment of PM<sub>2.5</sub> in northern** 2 **Chinese cities: implications for policy**

3 Yong Zhang<sup>1,2,3</sup>, Jie Tian<sup>1,2,4</sup>, Qiyuan Wang<sup>1,2,3,4\*</sup>, Lu Qi<sup>5</sup>, Manousos Ioannis Manousakas<sup>5</sup>, Yuemei Han<sup>1,4</sup>, Weikang  
4 Ran<sup>1,2</sup>, Yele Sun<sup>6</sup>, Huikun Liu<sup>1,2,4</sup>, Renjian Zhang<sup>6</sup>, Yunfei Wu<sup>6</sup>, Tianqu Cui<sup>5</sup>, Kaspar Rudolf Daellenbach<sup>5</sup>, Jay  
5 Gates Slowik<sup>5</sup>, André S. H. Prévôt<sup>5</sup>, Junji Cao<sup>6\*</sup>

6 <sup>1</sup> State Key Laboratory of Loess and Quaternary Geology, Institute of Earth Environment, Chinese Academy of  
7 Sciences, Xi'an 710061, China

8 <sup>2</sup> National Observation and Research Station of Regional Ecological Environment Change and Comprehensive  
9 Management in the Guanzhong Plain, Shaanxi, Xi'an 710061, China

10 <sup>3</sup> University of Chinese Academy of Sciences, Beijing 100049, China

11 <sup>4</sup> Center for Excellence in Quaternary Science and Global Change, Xi'an 710061, China

12 <sup>5</sup> Laboratory of Atmospheric Chemistry, Paul Scherrer Institute (PSI), Villigen 5232, Switzerland

13 <sup>6</sup> Institute of Atmospheric Physics, Chinese Academy of Sciences, Beijing 100029, China

14 *Correspondence:* wangqy@ieecas.cn (Qiyuan Wang), jjcao@mail.iap.ac.cn (Junji Cao).

15 **Abstract:** Fine particulate matter (PM<sub>2.5</sub>) pollution is still one of China's most important environmental issues,  
16 especially in northern cities during wintertime. In this study, intensive real-time measurement campaigns were  
17 conducted in Xi'an, Shijiazhuang, and Beijing to investigate the chemical characteristics and source contributions of  
18 PM<sub>2.5</sub> and explored the formation ~~progress~~ of heavy pollution for policy implications. The chemical compositions of  
19 PM<sub>2.5</sub> in three cities were all dominated by organic aerosol (OA) and nitrate (NO<sub>3</sub><sup>-</sup>). Results of source apportionment  
20 analyzed by hybrid environmental receptor model (HERM) showed that the ~~secondary nitrate plus sulfates~~secondary  
21 formation source contributed higher to PM<sub>2.5</sub> compared to other primary sources. Biomass burning was the dominant  
22 primary source in three pilot cities. The contribution of coal combustion to PM<sub>2.5</sub> is non-negligible in Xi'an and  
23 Shijiazhuang but is no longer an important contributor in the capital city of Beijing due to the execution of a strict  
24 coal-banning policy. The potential formation mechanisms of secondary aerosol in three cities were further explored  
25 by establishing the correlations between the ~~secondary nitrate plus sulfates~~secondary formation source and aerosol  
26 liquid water content (ALWC), and O<sub>x</sub> (O<sub>3</sub> + NO<sub>2</sub>), respectively. The results showed that photochemical oxidation and  
27 aqueous-phase reaction were two important pathways of secondary aerosol formation. According to sources  
28 variations, air pollution events that occurred in campaigns were classified into three types: biomass combustion  
29 dominated, ~~secondary nitrate plus sulfates~~secondary formation source dominated, and a combination of primary and  
30 secondary sources. Additionally, this study compared the changes in chemical composition and source contributions  
31 of PM<sub>2.5</sub> in past decades. The results suggested that the clean energy replacements for rural household should be

32 urgently encouraged to reduce the primary source emissions in northern China, and collaborative control on ozone  
33 and particulate matter need to be continuously promoted to weaken the atmosphere oxidation capacity for the sake  
34 of reducing secondary aerosol formation.

## 35 **1. Introduction**

36 Fine particulate matter (PM<sub>2.5</sub>, aerodynamic diameter  $\leq 2.5 \mu\text{m}$ ) is of large concern because of its adverse effects  
37 on both natural environment (Kuniyal and Guleria, 2019; Kuo et al., 2013) and human health (Pöschl, 2005; Shen et  
38 al., 2021; Zeng and He, 2019). With the soaring economic growth and urbanization in China, PM<sub>2.5</sub> pollution has  
39 been a most serious environmental issue in recent decades (Chan and Yao, 2008; He et al., 2002; Pui et al., 2014;  
40 Zhang et al., 2013). The most impressive case is that an extremely severe haze pollution episode occurred in eastern  
41 and central China in January 2013 with peak value of PM<sub>2.5</sub> concentration over  $500 \mu\text{g m}^{-3}$ . This month had been  
42 reported as the haziest month in the past 60 years in Beijing, China (Wang et al., 2014; Huang et al., 2014). Thereafter,  
43 aiming to improve air quality, the China central government ~~implemented~~issued the Air Pollution Prevention and  
44 Control Action Plan (APCAP) in September 2013 ([http://www.gov.cn/zwggk/2013-09/12/content\\_2486773.htm](http://www.gov.cn/zwggk/2013-09/12/content_2486773.htm), in  
45 Chinese), and the Three-year Action Plan to Fight Air Pollution (TAPFAP) in June 2018  
46 ([http://www.gov.cn/zhengce/content/2018-07/03/content\\_5303158.htm](http://www.gov.cn/zhengce/content/2018-07/03/content_5303158.htm), in Chinese). With the implementation of  
47 strict pollution controls, air quality in northern China has improved significantly over the past decade (Wang et al.,  
48 2020a, 2017; Li et al., 2020). Previous studies show that PM<sub>2.5</sub> concentration decreased notably in past two decades,  
49 and the composition of organic aerosol (OA), black carbon (BC) and sulfate (SO<sub>4</sub><sup>2-</sup>) decreased as well, while the  
50 ammonium (NH<sub>4</sub><sup>+</sup>) slightly increased and nitrate (NO<sub>3</sub><sup>-</sup>) increased obviously. In ~~perspective terms~~of PM<sub>2.5</sub> sources,  
51 contribution of secondary source increased obviously while contribution of industrial emission and coal combustion  
52 decreased due to elimination of industries and enterprises with high pollutant emissions, promotion of desulfurization  
53 in industrial facilities, replacement of clean energy, and optimization of industrial and energy structures (Lu et al.,  
54 2021; Ma et al., 2022; Tao et al., 2017; Wang et al., 2019). However, there is still a significant gap between the PM<sub>2.5</sub>  
55 concentration in northern China and its latest recommendations on air quality guideline ( $5 \mu\text{g m}^{-3}$ ) by the World  
56 Health Organization (<https://apps.who.int/iris/bitstream/handle/10665/345329/9789240034228-eng.pdf>, page 78). In  
57 addition, severe PM<sub>2.5</sub> pollutions still frequently occurred in northern China during wintertime (Guo et al., 2021; Li  
58 et al., 2017a, 2021b). To figure out the causes behind the pollutions and further improve ~~furtherly~~ air quality in  
59 northern China, it is essential to use online high-time-resolution source apportionment technology to understand the  
60 chemical composition and source contribution of PM<sub>2.5</sub> in those pollution events.

61 Recently, more research on measurements of PM<sub>2.5</sub> and its source apportionments were conducted using online high-  
62 time-resolution technologies (Li et al., 2017c; Wang et al., 2021a; Elser et al., 2015). Compared to traditional offline  
63 filter-based approach, online methods characterize the short-time variation of PM<sub>2.5</sub>. It allows for distinguishing the  
64 rapid changes and evolutions of chemical components, and is particularly profitable to gain knowledge on the  
65 formations of heavy air pollution or episode events (Liu et al., 2016; Ouyang et al., 2019; Zheng et al., 2016; Elser  
66 et al., 2015). For instance, Lv et al. (2021) employed a Positive matrix factorization (PMF) model with high-time-  
67 resolution online PM<sub>2.5</sub> data to accurately quantify and distinguish the source distributions in Beijing during two haze  
68 episodes in January 2019. Liu et al. (2019) recognized the main drivers of haze event occurred in winter Beijing in  
69 2016 according to high-time-resolution source apportionment of PM<sub>2.5</sub> with multiple models. Furthermore, Wang et  
70 al. (2021b) found that vehicle emission contributed most to PM<sub>2.5</sub> during pollution episodes in downtown Lanzhou  
71 based on high-resolution online data source apportionment. Currently, to fully understand and solve heavy pollution  
72 events in winter that troubles local governments in northern cities of China (Wang et al., 2022b; Xu et al., 2022; Zhou  
73 et al., 2022), more advanced online measurement, and source apportionment is a better choice (Tao et al., 2015). It  
74 should be pointed out that previous researches were mainly focused on individual cities, and those results have some  
75 limitations in guiding the improvement of air quality in the entire northern region of China. Therefore, it is necessary  
76 to conduct comparative research among multiple cities.

77 Considering the differences in geographical location, population, economy, industrial/energy structure, air quality,  
78 and depth of air pollution control measures among different cities, three cities in northern China including Beijing,  
79 Shijiazhuang and Xi'an were chosen as pilot research subjects. The cities of Beijing and Shijiazhuang are located ~~to~~  
80 in the North China Plain, which is one of the most polluted regions in China (Chan and Yao, 2008). Beijing is the  
81 capital of China and its air quality has significantly improved under the implementation of the strictest clean air  
82 policy since 2013 (Li et al., 2021a; Pang et al., 2021; Vu et al., 2019; Zhang et al., 2020). However, the city was still  
83 plagued by pollution events in wintertime (Wang et al., 2020b; Yang et al., 2022c; Zhou et al., 2022). Shijiazhuang  
84 was recognized as one of the most serious air pollution cities worldwide (Liu et al., 2018b; Huang et al., 2019). Its  
85 air quality had also improved under the implementation of the Clean Air Plan, whereas its annual PM<sub>2.5</sub> concentration  
86 was still unable to meet the China's National Ambient Air Quality Standards (NAAQS-II) of 35  $\mu\text{g m}^{-3}$  until 2021  
87 (Fig. S1). Xi'an is located ~~to~~in the Fenwei Plain, which is a region that suffered from heavy pollution and was  
88 designated as a key region for TAPFAP in 2018 (Cao and Cui, 2021). Compared with Beijing and Shijiazhuang, high-  
89 intensity air pollution controls in Xi'an started late due to a lack of financial support. And the annual PM<sub>2.5</sub>

90 concentration in Xi'an could not meet the NAAQS-II until 2021 as well (Fig. S1). Meanwhile, it is still unclear ~~to~~  
91 about the actual causes of the pollution, either topography, meteorological conditions, or local emissions (Chen et al.,  
92 2021; Tian et al., 2022; Wang et al., 2015, 2022b). In this study, we conducted intensive real-time observation of  
93 PM<sub>2.5</sub> chemical components in Xi'an, Shijiazhuang, and Beijing during wintertime. The objectives are 1) to determine  
94 the characteristics of PM<sub>2.5</sub> and its chemical components in the three typical northern China cities during wintertime;  
95 2) to quantify the source contribution and explore the potential formation mechanism of secondary aerosols; 3) to  
96 explore the unique causes of heavy pollution events in different cities; and 4) to provide suggestions on establishment  
97 of efficient policies for air quality continuous improvement. This study provides scientific guidance for developing  
98 policy on air quality improvement for northern China cities.

## 99 **2. Methods**

### 100 **2.1 Sampling sites and periods**

101 In this study, intensive online measurements of PM<sub>2.5</sub> were conducted at three pilot cities of Xi'an, Shijiazhuang, and  
102 Beijing during wintertime (Fig. 1). The sampling sites in Xi'an and Beijing are located at two Chinese Academy of  
103 Sciences (CAS) stations. The one in Xi'an is the Guanzhong Plain Ecological Environment Change and  
104 Comprehensive Treatment National Observation and Research Station, Institute of Earth Environment (IEE)  
105 (34.24°N, 108.87°E), and another one in Beijing is Tower Branch of the Institute of Atmospheric Physics (IAP)  
106 (39.98°N, 116.39°E). Both two sites are surrounded by commercial and residential buildings without intense  
107 industrial emissions nearby. Previous studies indicated that these two sites were influenced by biomass and coal  
108 burning for heating and cooking during wintertime as well as usual local traffic emissions (Tian et al., 2021; Xu et  
109 al., 2021). The sampling site in Shijiazhuang is situated in the courtyard of Hebei Sailhero Environmental Protection  
110 High-tech Co., Ltd. (38.04°N, 114.65°E), which is surrounded by pharmaceutical and machine-building industries  
111 and close to the streets. The intensive campaigns were continuously conducted for ~1 month in each city (i.e., 12  
112 December 12<sup>th</sup> 2020 to January 7<sup>th</sup> 2021 in Xi'an, December 20<sup>th</sup> 2021 to January 24<sup>th</sup> 2022 in Shijiazhuang, and  
113 January 17<sup>th</sup> 2021 to February 20<sup>th</sup> 2021 in Beijing).

### 114 **2.2 Online measurements of PM<sub>2.5</sub> chemical components**

#### 115 **2.2.1 Organic aerosol and inorganic ions**

116 Concentrations of OA, NO<sub>3</sub><sup>-</sup>, SO<sub>4</sub><sup>2-</sup>, ammonium (NH<sub>4</sub><sup>+</sup>), and chloride (Cl<sup>-</sup>) in PM<sub>2.5</sub> at a 15-minute time resolution

117 were monitored by a quadrupole aerosol chemical speciation monitor (Q-ACSM, Aerodyne Research Inc., Billerica,  
118 Massachusetts, USA) equipped with a PM<sub>2.5</sub> lens. The detailed operational principles and calibration method of the  
119 Q-ACSM are described elsewhere (Ng et al., 2011; Hu et al., 2017). First, the sampled ambient air stream passed  
120 through a PM<sub>10</sub> impactor inlet and a Nafion<sup>®</sup> dryer (MD-700-24F-3; Perma Pure, Inc., Lakewood, NJ, USA) with a  
121 flowrate of 5 L min<sup>-1</sup> before entering the Q-ACSM chamber. Then, the pre-treatment particles passed through a 100  
122 μm critical orifice at 0.1 L min<sup>-1</sup> and were focused into a narrow beam by an aerodynamic intermediate pressure lens.  
123 The focused particle beam was flash vaporized by a capture vaporizer (CV) at ~600 °C. The vaporized compounds  
124 were then ionized by an electron impactor (EI) ionization source at 70 eV and subsequently analyzed by the  
125 quadrupole mass spectrometer.

126 Based on calibration system consists of an atomizer (Model 9302, TSI Inc., Shoreview, MN, USA), a differential  
127 mobility analyzer (DMA, TSI model 3080, TSI Inc.), and a condensation particle counter (CPC, TSI model 3772,  
128 TSI Inc.), ammonium nitrate (NH<sub>4</sub>NO<sub>3</sub>) and ammonium sulfate ((NH<sub>4</sub>)<sub>2</sub>SO<sub>4</sub>) aerosol were used for calibration. The  
129 raw data of Q-ACSM were analyzed by the ACSM local tool (V1.5.3.5, Aerodyne Research Inc., Billerica,  
130 Massachusetts, USA) compiled with Igor Pro 6.37 (Wavemetrics, Lake Oswego, OR, USA). The response factors  
131 (RFs) for NO<sub>3</sub><sup>-</sup> in Xi'an, Shijiazhuang, and Beijing were set as 2.03×10<sup>-11</sup>, and 5.9×10<sup>-11</sup>, 2.20×10<sup>-11</sup>, respectively,  
132 and the relative ionization efficiencies (RIEs) for NH<sub>4</sub><sup>+</sup> and SO<sub>4</sub><sup>2-</sup> were set as 8.06 and 0.83 in Xi'an, 5.82 and 0.30  
133 in Shijiazhuang, 6.31 and 0.38 in Beijing, respectively. Other RIEs for NO<sub>3</sub><sup>-</sup>, OA, and Cl<sup>-</sup> were set as default values  
134 of 1.4, 1.1, and 1.3, respectively (Ng et al., 2011). In addition, the collection efficiency (CE) value of Q-ACSM  
135 equipped with a PM<sub>2.5</sub> lens was recommended as 1 based on laboratory simulation experiments by Xu et al. (2017).  
136 Finally, the chemical components monitored by Q-ACSM was corrected by the results of offline filter sampling  
137 experiments during the same periods (Fig. S2).

### 138 **2.2.2 Black carbon**

139 BC concentration in PM<sub>2.5</sub> was obtained by an Aethalometer (Model AE33, Magee Scientific Inc., Berkeley, CA,  
140 USA) with a 1-minute time resolution. The AE33 monitors the light attenuation of seven wavelengths (λ = 370, 470,  
141 525, 590, 660, 880, and 940 nm), and the light attenuation at λ = 880 nm was used to calculate BC concentration  
142 (Wang et al., 2019; Drinovec et al., 2015). Briefly, the ambient air was first sampled on a filter tape inside the  
143 instrument through a PM<sub>2.5</sub> cyclone (SCC-1.829, BGI Inc., USA) at a flowrate of 5 L min<sup>-1</sup>. The entering particles  
144 were divided into two sample spots on the filter through two channels with different follows. Then the light

145 attenuation transmitted through two parallel spots was detected. For quality accuracies of monitoring, the sampled  
146 particles were desiccated with a Nafion<sup>®</sup> dryer (MD-700-24F-3; Perma Pure, Inc., Lakewood, NJ, USA) before  
147 entering the AE33. Furthermore, a real-time loading effect compensation algorithm based on two spots measurement  
148 was used to eliminate the nonlinear loading effects of the Aethalometer. A detailed description of the Model AE33  
149 principle can be found in Drinovec et al. (2015).

### 150 **2.2.3 Elements**

151 Twenty-four elements, including Si, K, Ca, V, Cr, Mn, Fe, Co, Ni, Cu, Zn, Ga, As, Se, Ag, Cd, Sn, Ba, Au, Hg, Th,  
152 Pb, and Pd in PM<sub>2.5</sub>, were analyzed by a Xact625 Ambient Metals Monitor (Cooper Environmental Services, Tigard,  
153 Oregon, USA) with a 1-hour time resolution. Si, K, Ca, Cr, Mn, Fe, Ni, Cu, Zn, As, Se, Ba, and Pb were selected for  
154 further analysis in Xi'an and Beijing, while other elements were excluded due to most of their concentration below  
155 the method detection limit. In Shijiazhuang, S, Cl, and Ti were analyzed by replacement of Ga, Ag and Au,  
156 respectively. Finally, Si, K, Ca, Ti, Cr, Mn, Fe, Ni, Cu, Zn, As, Se, Ba, and Pb were selected for further analysis. The  
157 description and detection principles of Xact625 were introduced by Furger et al. (2020) and Rai et al. (2020). In brief,  
158 the ambient air stream was firstly sampled on a Teflon filter tape inside the instrument through a PM<sub>2.5</sub> cyclone inlet  
159 at a constant flow rate of 16.7 L min<sup>-1</sup>, and then the sample was automatically analyzed by nondestructive energy-  
160 dispersive X-ray fluorescence (XRF) to determine the mass of the species. For quality control and assurance, the  
161 Xact625 performed automatic internal quality control by testing the Pd rod every hour to ensure the stability of the  
162 instrument. Energy calibration was performed daily from 00:00 to 00:15 and a range calibration from 00:15 to 00:30  
163 local standard time (LST) to monitor any possible shift and instability of the XRF (Liu et al., 2019). During our  
164 sampling periods, the concentration of Pd varies within 3 standard deviations (Fig. S3), illustrating the reliable and  
165 stable performance of the Xact625.

### 166 **2.2.4 Complementary data**

167 Online hourly concentrations of PM<sub>2.5</sub> and gas pollutants (i.e., NO<sub>x</sub>, NO<sub>2</sub>, CO, SO<sub>2</sub>, and O<sub>3</sub>) were acquired from the  
168 National Air Quality Monitoring Station (<https://air.cnemc.cn:18007/>). Meteorological parameters, including wind  
169 speed (WS), wind direction (WD), relative humidity (RH), and temperature (T) were obtained from National  
170 Meteorological Station (<http://data.cma.cn/>). The detailed information for complementary data was listed in Table S1.

## 171 **2.3 Data analysis**

### 172 2.3.1 PM<sub>2.5</sub> mass reconstruction

173 Chemical closure was utilized to assess whether chemical compositions can be representative of PM<sub>2.5</sub>. The sum of  
174 OA, NO<sub>3</sub><sup>-</sup>, SO<sub>4</sub><sup>2-</sup>, NH<sub>4</sub><sup>+</sup>, Cl<sup>-</sup>, BC, mineral dust (MD), and trace elements (TE) was considered as the reconstructed  
175 PM<sub>2.5</sub>, where MD and TE were calculated as follows (Chow et al., 2015).

$$176 [\text{MD}] = 2.20 \times [\text{Al}] + 2.49 \times [\text{Si}] + 1.63 \times [\text{Ca}] + 2.42 \times [\text{Fe}] + 1.94 \times [\text{Ti}] \quad (1)$$

$$177 [\text{TE}] = [\text{K}] + [\text{Cr}] + [\text{Mn}] + [\text{Ni}] + [\text{Cu}] + [\text{Zn}] + [\text{As}] + [\text{Se}] + [\text{Ba}] + [\text{Pb}] \quad (2)$$

178 where [ ] represents the chemical species concentration; [Al] and [Ti] were calculated by the concentration of Ca  
179 ([Al] = 4.3 × [Ca] and [Ti] = 0.25 × [Ca]) (Wei et al., 1991). Good correlations between online and reconstructed PM<sub>2.5</sub>  
180 mass (slope = 0.87–1.10, R<sup>2</sup> = 0.82–0.93) in three pilot cities (Fig. S4) indicated that our measurements could detect  
181 major components of PM<sub>2.5</sub>. The PM<sub>2.5</sub> concentration used in the following discussion referred to the reconstructed  
182 PM<sub>2.5</sub> concentration.

### 183 2.3.2 Hybrid environment receptor model

184 Source apportionment of PM<sub>2.5</sub> was analyzed with a bilinear model named the hybrid environment receptor model  
185 (HERM). HERM is developed by the IEECAS and the University of Nevada, Las Vegas (Chen and Cao, 2018). Like  
186 other receptor models, the speciation of pollutants at a receptor site can be separated into emission sources and the  
187 chemical compositions of the sources. To solve the mass balance of PM<sub>2.5</sub>, the bilinear HERM in matrix notation is  
188 defined as follows

$$189 C_{mn} = \sum_{i=1}^I F_{mi} G_{in} + Q_{mn} \quad (3)$$

190 where  $C_{mn}$  is the measured concentration of chemical species  $m$  during time  $n$ ;  $F_{mi}$  is the source profile, that is the  
191 fractional quantity of species  $m$  in source  $i$  emission;  $G_{in}$  represents the contribution of source  $i$  during time  $n$ ; and  
192  $Q_{mn}$  is the model residual for species  $m$  concentration measured during time  $n$ . Based on an iterative conjugate  
193 gradient algorithm, the HERM solves  $G_{in}$  and unknown  $F_{mi}$  by minimizing the  $Q_{mn}$ , which is defined as follows.

$$194 Q_{mn} = \sum_{m=1}^M \sum_{n=1}^N \frac{(C_{mn} - \sum_{i=1}^I F_{mi} G_{in})^2}{\sigma_{C_{mn}}^2 + \sum_{i=1}^I (\sigma_{F_{mi}}^2 G_{in}^2 + \delta_{mi} \sigma_{C_{mn}}^2)} \quad (4)$$

195 where  $M$ ,  $N$ , and  $I$  are the number of samples, chemical species, and sources, respectively;  $\sigma_{F_{mi}}$  represents the error  
196 in the variability in the constrained factor profile.  $\delta_{mi}$  was set to 0 or 1 depending on whether the  $i^{\text{th}}$  factor profile  
197 is constrained or unconstrained, respectively.

198 The HERM input data included the concentration and uncertainty data of chemical species. 19 chemical species in



199 Xi'an and Shijiazhuang and 20 chemical species in Beijing were selected for source apportionment, respectively.  
200 Details of selected chemical species and its uncertainty calculation was described in Text S1 in the Supplement. A  
201 range from two to ten factors solutions was investigated by HERM with completely unconstrained factor profiles to  
202 search for optimal solutions. The detailed diagnostics can be seen in Text S2 in the Supplement. A six-factor solution  
203 for Xi'an and Shijiazhuang and an eight-factor solution for Beijing were found to be the optimal solution based on  
204 multiple criteria including 1) variations in  $Q/Q_{\text{exp}}$  which can be used to choose the optimal number of resolved factors,  
205 2) physical meaningfulness of distinct factor profiles and explained variation (EV) values of variables, 3) good  
206 correlations between sources contribution and external and internal tracers, and 4) agreement between the measured  
207 and modeled  $\text{PM}_{2.5}$  mass. More detailed information on the final selected factor profiles and contributions is presented  
208 in Sect. 3.2.

### 209 **2.3.3 Aerosol liquid water content**

210 Aerosol liquid water content (ALWC) was calculated by ISORROPIA-II thermodynamic equilibrium model  
211 (<http://isorrophia.eas.gatech.edu/>) based on data of  $\text{PM}_{2.5}$  chemical species (including  $\text{NO}_3^-$ ,  $\text{SO}_4^{2-}$ ,  $\text{NH}_4^+$ , and  $\text{Cl}^-$ ) and  
212 meteorological parameters including relative humidity (RH) and temperature (T), more model information can be  
213 found in Fountoukis and Nenes (2007). It should be noted that the ISORROPIA-II model does not consider the  
214 contribution of the organic, as inorganic aerosols are the most hygroscopic species and dominant contributor to  
215 ALWC (Huang et al., 2020).

## 216 **3. Results and discussion**

### 217 **3.1 –Characteristics of $\text{PM}_{2.5}$ and its chemical components**

218 Figure 1 illustrates the mass composition of  $\text{PM}_{2.5}$  in three pilot cities during the sampling periods, and their  
219 concentrations levels are summarized in Table S4. The average  $\text{PM}_{2.5}$  concentrations in Xi'an, Beijing, and  
220 Shijiazhuang were  $77 \pm 47 \mu\text{g m}^{-3}$ ,  $64 \pm 57 \mu\text{g m}^{-3}$ , and  $60 \pm 39 \mu\text{g m}^{-3}$ , respectively. It is noted that the average  $\text{PM}_{2.5}$   
221 concentrations in Xi'an, Beijing, and Shijiazhuang did not meet the second level of the NAAQS, indicating that it is  
222 necessary to establish more particular and efficient pollution reduction measures. As shown in Fig. 1, the chemical  
223 compositions of  $\text{PM}_{2.5}$  were similar in Beijing and Shijiazhuang (Fig. 1b and c) which was mainly composed of OA  
224 (26.9–34.2%), followed by  $\text{NO}_3^-$  (23.6–26.5%),  $\text{SO}_4^{2-}$  (11.8–15.0%),  $\text{NH}_4^+$  (11.8–14.8%), MD (7.4–10.1%), BC (2.9–  
225 6.5%), and  $\text{Cl}^-$  (1.1–4.8%). However, in Xi'an, MD contributed in comparison more to  $\text{PM}_{2.5}$  (17.3%), while  $\text{SO}_4^{2-}$

226 had a smaller contribution (6.8%). This could be explained by more construction activities and MD transport from  
227 the Loess Plateau to Xi'an (Long et al., 2016; Yan et al., 2015). Meanwhile, the lowest sulfur oxidation ratio (SOR)  
228 was observed in Xi'an ( $0.18 \pm 0.08$ , see Table S5), indicating weak efficiency of the second generation of  $\text{SO}_4^{2-}$ . The  
229 sum of  $\text{SO}_4^{2-}$ ,  $\text{NO}_3^-$  and  $\text{NH}_4^+$  accounted for 39.0–53.0% of  $\text{PM}_{2.5}$  in three pilot cities, highlighting the importance of  
230 the secondary inorganic components in northern China. In addition, the fractions of BC,  $\text{Cl}^-$ , and TE in  $\text{PM}_{2.5}$  were  
231 lower in Beijing than those in the other two cities, which can be explained by the stricter local control policies on  
232 solid fuels combustion and tightening the industrial emission standards in and near the capital city of China (Li et al.,  
233 2021a; Pang et al., 2021).

234 To ~~have a~~ better understanding of the impact of the chemical components, the mass fraction of each component was  
235 plotted as a function of the  $\text{PM}_{2.5}$  mass concentration (Fig. 2a–c). The two dominant components of  $\text{PM}_{2.5}$  were OA  
236 (25.7–38.0%) and MD (19.9–37.1%) while the  $\text{PM}_{2.5}$  concentrations were below  $40 \mu\text{g m}^{-3}$ . The fraction of OA in  
237  $\text{PM}_{2.5}$  was the highest in Shijiazhuang and Beijing, while MD contributed most to  $\text{PM}_{2.5}$  in Xi'an. This is potentially  
238 related to more emissions and higher backgrounds of local dust. With ~~increasing~~ increases of the  $\text{PM}_{2.5}$  mass  
239 concentration, the fractions of chemical components in Xi'an and Shijiazhuang changed notably. The fractions of OA  
240 and  $\text{NO}_3^-$  increased the most and reached the peaks of 40.1% and 28.7%, respectively, when the  $\text{PM}_{2.5}$  concentration  
241 reached  $\sim 196 \mu\text{g m}^{-3}$  in Xi'an. On the contrary,  $\text{NO}_3^-$  and  $\text{SO}_4^{2-}$  were two dominant drivers of increasing  $\text{PM}_{2.5}$   
242 concentrations in Shijiazhuang, showing peak contributions of 32.5% and 18.7%, respectively, when the  $\text{PM}_{2.5}$   
243 concentration was over  $100 \mu\text{g m}^{-3}$ . Compared to Xi'an and Shijiazhuang, Beijing had relatively stable fractions of  
244 each chemical component with increasing  $\text{PM}_{2.5}$  concentrations. Particularly, the fractions of OA and  $\text{NO}_3^-$   
245 contributed dominantly with averages of  $33.3 \pm 3.0\%$  and  $25.3 \pm 2.5\%$ , respectively, when the  $\text{PM}_{2.5} > 40 \mu\text{g m}^{-3}$ .

### 246 3.2 Source apportionment of $\text{PM}_{2.5}$

247 Six potential sources, including biomass burning, fugitive dust, industrial emission, coal combustion, vehicle  
248 emission, and ~~secondary nitrate plus sulfates~~ secondary formation source, were resolved by the HERM analysis. In  
249 Beijing, ~~secondary nitrate plus sulfates~~ secondary formation source was furtherly divided into secondary nitrate plus  
250 OA and secondary sulfate plus OA. A special pollution source of firework was separated due to the Chinese Spring  
251 Festival (from New Year's Eve to January 3<sup>rd</sup> in the lunar calendar). Figures S6–S8 present the sources profiles and  
252 contributions in Xi'an, Shijiazhuang, and Beijing, respectively. Biomass burning features high Explained Variation  
253 (EV) for the two tracers  $\text{Cl}^-$  (33–58%) and K (30–44%) in the three cities (Ni et al., 2017; Zhao et al., 2021). The

254 fugitive dust is characterized by high EV values for Si (60–90%) and Ca (34–54%), which are the dominant chemical  
255 species in the fugitive dust profiles in northern China (Shen et al., 2016; Zhao et al., 2006). The fractions of industrial  
256 emission vary among the cities, showing high EV for Ni (55% and 87%) and Cr (25% and 70%) in Xi'an and  
257 Shijiazhuang, and high EV for Cr (26%), Mn (40%), and Pb (27%) in Beijing. Ni is possibly emitted from the  
258 semiconductor industry (Simka et al., 2005). Cr, Mn, and Pb could originate from the steel manufacturing and  
259 incinerator fly ash (Duan and Tan, 2013; Ledoux et al., 2017). Coal combustion is characterized by high EV values  
260 for As (38–75%), Se (40–50%), and Pb (31–57%). These elements are enriched in coals, which are reliable indicators  
261 of coal combustion (Tian et al., 2013; Xu et al., 2012). The vehicle non-exhaust emissions could be identified by the  
262 elements Ba, Cu, Ca, Fe, and Mn. Cu and Ba can be released from brake and tire wear of vehicles (Adachi and  
263 Tainosho, 2004; Thorpe and Harrison, 2008). Moreover, Fe and Mn could be emitted from the combustion of  
264 lubricating oil and fuel additives (Ålander et al., 2005; Lewis et al., 2003). Relatively high EV values for Ba (68%),  
265 Cu (36%), and Ca (35%) are seen in Xi'an, significantly high EV values of Mn (68%), Fe (65%), Cu (53%), and Ba  
266 (80%) are characterized in Shijiazhuang and relatively high EV values of Fe (34%) and Cu (39%) are featured in  
267 Beijing, respectively. Moreover, moderate EV values for BC (18–27%) and OA (13–22%) are commonly regarded  
268 as contributions of vehicles engine exhaust, while the temporal variations of VE are well correlated with gaseous  
269 NO<sub>x</sub> or NO<sub>2</sub> in three cities ( $R^2 = 0.45\text{--}0.78$ ), which is the good tracer of traffic-related emissions (Huang et al., 2017;  
270 Li et al., 2017b). The secondary sources resolved by HERM are different among the three cities. In Xi'an and  
271 Shijiazhuang, ~~the source of secondary nitrate plus sulfate~~this factor are characterized by high EV values for SO<sub>4</sub><sup>2-</sup>  
272 (62–75%), NO<sub>3</sub><sup>-</sup> (55–53%), NH<sub>4</sub><sup>+</sup> (60–56%) and a medium EV value for OA (23–29%), which showed good  
273 correlations with SO<sub>4</sub><sup>2-</sup> ( $R^2 = 0.85\text{--}0.90$ ) and NO<sub>3</sub><sup>-</sup> ( $R^2 = 0.85\text{--}0.92$ ) (Dai et al., 2020; Tian et al., 2022). In addition,  
274 The OA concentration in this factor was calculated by EV value of OA, which was close to the secondary OA (SOA)  
275 concentration estimated by BC-trace method (see Text S3 and Table S6). This means that SOA was mixed in this  
276 factor, therefore, this factor was identified as secondary formation source. In Beijing, two secondary sources were  
277 resolved. The first one was characterized by high EV value for NO<sub>3</sub><sup>-</sup>(58%), NH<sub>4</sub><sup>+</sup> (42%) and medium values for OA  
278 (21%), another one was characterized by high EV value for SO<sub>4</sub><sup>2-</sup>(58%), and medium values for OA (16%), NH<sub>4</sub><sup>+</sup>  
279 (30%). The OA concentration in those two factors was also comparable to that estimated by BC-trace method (see  
280 Text S3). So, those two sources were identified as secondary nitrate plus OA and secondary sulfate plus OA~~the~~  
281 ~~secondary sources of nitrate and sulfate show high EV values of 58% and 65%, respectively.~~ The combination of  
282 secondary nitrate plus OA and secondary sulfate plus OA~~secondary nitrate and secondary sulfate~~ is equivalent to the  
283 secondary nitrate plus sulfate~~secondary formation source~~ for next discussion. Additionally, the source of firework

284 emission is characterized by high EV values of Ba (83%), Cu (45%), and K (38%), which are recognized as common  
285 indication in fireworks (Rai et al., 2020; Tian et al., 2014).

286 The modeled PM<sub>2.5</sub> mass was well correlated with the reconstructed PM<sub>2.5</sub> mass ( $R^2 = 0.99$ , slope = 0.90–1.01, Fig.  
287 [S9S10](#)) in three pilot cities, indicating the established models are reasonable. As shown in Fig. 1d and e, the  
288 contributions of primary sources (i.e., the sum of biomass burning, fugitive dust, industrial emission, coal combustion,  
289 and vehicle emission) in PM<sub>2.5</sub> were significantly higher than those of the ~~source of secondary nitrate plus~~  
290 ~~sulfate~~[secondary formation source](#) in Xi'an and Shijiazhuang, indicating the PM<sub>2.5</sub> in these two cities are mainly  
291 influenced by the primary source emissions during wintertime. Particularly, biomass burning and coal combustion  
292 were two dominant contributors to PM<sub>2.5</sub> with contributions of 24.6% and 15.1%, respectively, in Xi'an; and 24.4%  
293 and 16.0%, respectively, in Shijiazhuang. These suggest that controls of solid fuel combustion are critical to reducing  
294 PM<sub>2.5</sub> pollution in these cities. In contrast, the contribution of ~~secondary nitrate plus sulfate~~[secondary formation](#)  
295 ~~source~~ to PM<sub>2.5</sub> in Beijing was highly dominant (> 50%), potentially attributed to strict control of primary emissions  
296 under the execution of a series of pollution control policies (Lv et al., 2016; Pang et al., 2021), and more regional  
297 transportation of secondary pollutants (Liu et al., 2019; Wang and Zhao, 2018). Among the primary sources, the  
298 contributions of biomass burning and vehicle emission were only 18.4% and 11.3%, respectively, further reflecting  
299 the benefits of reductions of all primary emissions. Due to the Chinese Spring Festival, the contribution of firework  
300 (7.9%) to PM<sub>2.5</sub> ranked second in primary sources (Fig. [S10S11](#)). Which indicates more refined control schemes need  
301 to be encouraged to deal with such special event in the future. It should be noted that contribution of fugitive dust  
302 was all lower than fraction of mineral dust in the three pilot cities (Fig. 1). This is because fugitive dust defined here  
303 mainly refers road and construction dust emission. While mineral dust represents material assumed oxides of mineral  
304 elements such as Al, Si, Ca, Ti and Fe (Chow et al., 2015). These mineral elements in PM<sub>2.5</sub> comes from more  
305 emission sectors including industry, crust, and transportation, construction, combustion (Liu et al., 2018a; Lu et al.,  
306 2014; Pant and Harrison, 2013; Shen et al., 2016).

307 Figures 2d–f shows variations of source contribution with increases in PM<sub>2.5</sub> mass concentrations in three pilot cities.  
308 The most two dominant sources were ~~secondary nitrate plus sulfate~~[secondary formation source](#) (32.1%) and fugitive  
309 dust (31.4%) in Xi'an, coal combustion (24.9%) and vehicle emission (21.3%) in Shijiazhuang, and ~~secondary nitrate~~  
310 ~~plus sulfate~~[secondary formation source](#) (24.3%) and fugitive dust (23.8%) in Beijing, when the PM<sub>2.5</sub> mass  
311 concentration <40  $\mu\text{g m}^{-3}$ . In Xi'an, when the PM<sub>2.5</sub> mass concentrations exceeded 180  $\mu\text{g m}^{-3}$ , the contribution of

312 biomass burning raised mostly and reached the peak of 38.4%, demonstrating that biomass burning plays an important  
313 role in worsening of air quality in Xi'an. On the contrary, the contributions of ~~secondary nitrate plus sulfates~~secondary  
314 formation source increased mostly in comparison to other sources in Shijiazhuang and Beijing, indicating the PM<sub>2.5</sub>  
315 pollution was mainly dominated by the secondary aerosol formations during the wintertime. And the peak  
316 contributions of secondary nitrate and sulfate were 66.5% and 74.7% while the PM<sub>2.5</sub> mass concentration increased  
317 to 113  $\mu\text{g m}^{-3}$  and 223  $\mu\text{g m}^{-3}$  in Shijiazhuang and Beijing, respectively.

### 318 3.3 Formation of secondary aerosols

319 Using the high-time-resolution data, we further explored the possible formation mechanisms of ~~secondary nitrate~~  
320 ~~plus sulfates~~secondary formation source. The concentration of ~~secondary nitrate plus sulfates~~secondary formation  
321 source is standardized by dividing background corrected CO ( $\Delta\text{CO}$ ) to ~~weaken~~ impact of planetary boundary layer  
322 height (PBLH) (DeCarlo et al., 2010). In this study,  $\Delta\text{CO}$  is defined as the 1.25<sup>th</sup> percentile of CO concentration  
323 during the campaign, which are 0.17, 0.15, and 0.16 ppm in Xi'an, Shijiazhuang, and Beijing, respectively.  $\text{O}_x$  ( $\text{NO}_2$   
324 +  $\text{O}_3$ ) is an indicator of the photochemical oxidation degree (Wood et al., 2010). The function between ~~secondary~~  
325 ~~nitrate plus sulfates~~secondary formation source/ $\Delta\text{CO}$  ratio and  $\text{O}_x$  during the daytime (i.e., 08:00–17:00 LST) (Fig.  
326 ~~S11~~S12) was plotted to explain the effect of photochemical oxidations in three pilot cities. As shown in Fig. 3, good  
327 linear correlations of ~~secondary nitrate plus sulfates~~secondary formation source/ $\Delta\text{CO}$  and  $\text{O}_x$  ( $R^2 = 0.83\text{--}0.99$ ) suggest  
328 that photochemical oxidations play an important role in the formation of secondary aerosol during the daytime.  
329 Compared to the low-level  $\text{O}_x$ , formation of secondary aerosol significantly enhanced at high-level  $\text{O}_x$  (>50 ppb) in  
330 Xi'an and Beijing, characterized by larger slopes of 17.2 and 38.9, respectively (Fig. 3a and c). Furthermore, the  
331 highest atmospheric oxidation capacity was found in Beijing, inferring by the highest fraction of  $\text{O}_3$  to  $\text{O}_x$ . This is  
332 consistent with the highest contribution of ~~secondary nitrate plus sulfates~~secondary formation source to PM<sub>2.5</sub> in  
333 Beijing during the daytime (Fig. ~~S12a~~S13a–c).

334 The aqueous-phase reaction is another important pathway for secondary aerosol formation in the atmosphere (Wang  
335 et al., 2018; Xue et al., 2014). ALWC is considered an indicator of an aqueous-phase reaction (Ervens et al., 2011).  
336 ~~Considering that the aqueous-phase reaction occurs both during the daytime and nighttime characterized by good~~  
337 ~~correlations between secondary formation source/ $\Delta\text{CO}$  and ALWC ( $R^2 = 0.81\text{--}0.98$ , Fig. S14).~~ The correlations of  
338 ~~secondary nitrate plus sulfates~~secondary formation source/ $\Delta\text{CO}$  ratio and ALWC during ~~nighttime all sampling~~  
339 ~~periods (18:00–07:00 the next day LST, Fig. S11)~~ were ~~re~~-established in three pilot cities to assess the implications

340 of aqueous-phase chemistry for secondary aerosol production. As shown in Fig. 4, The secondary formation  
341 source nitrate plus sulfate/ΔCO showed a significant linear correlation to ALWC ( $R^2 = 0.8192-0.9599$ ) when RH <  
342 80% (Fig. 4), indicating an obvious effect of aqueous-phase reaction on the secondary aerosol formation during the  
343 nighttime sampling periods. However, when RH >80%, the secondary formation source nitrate plus sulfate/ΔCO  
344 showed no notable increase with ALWC in Shijiazhuang (Fig. 4b), whereas a tiny increase with ALWC in Beijing  
345 (Fig. 4c). The higher ALWC at RH > 80% probably inhibits secondary aerosol formation due to the decrease in  
346 aerosol acidity (Huang et al., 2019; Meng et al., 2014). Khan et al. (2008) found that NO<sub>3</sub> radicals can rapidly generate  
347 from the reaction between NO<sub>2</sub> and O<sub>3</sub> with unsaturated organic species during nighttime. The value of O<sub>3</sub>×NO<sub>2</sub> can  
348 thus represent its production reaction rate or be used as a proxy for the NO<sub>3</sub> radical. The highest NO<sub>3</sub> radical  
349 production rate was found in Beijing, followed by Xi'an and Shijiazhuang, when RH<80%. This could be used to  
350 explain the highest contribution of secondary formation source nitrate plus sulfate to PM<sub>2.5</sub> in Beijing during the  
351 daytime and nighttime (Fig. S123d-f). Moreover, the results showed that both photochemical oxidation and aqueous-  
352 phase reaction play more important roles in Beijing, where the primary sources have been better controlled. This  
353 reflects that pollution control policies need to be focused on the suppression of secondary formations.

#### 354 3.4 Elaborations of different episode cases

355 During the sampling periods, the concentration of PM<sub>2.5</sub> and its chemical components simply accumulated within a  
356 short period in a few cases (Fig. S13a-S15a-c). We define such a rapid rise in PM<sub>2.5</sub> mass concentration as a pollution  
357 episode. As shown in Table 1, meteorological conditions, the concentration levels of gaseous pollutants, chemical  
358 compositions, and source contributions of PM<sub>2.5</sub> during pollution episodes in three pilot cities are summarized. The  
359 episodes were accompanied by low wind speed (< 2 m s<sup>-1</sup>), leading to weak dispersions of the fresh emissions and  
360 accumulated pollutants (Chen et al., 2020b). OA and NO<sub>3</sub><sup>-</sup> were The the two dominant chemical components in PM<sub>2.5</sub>  
361 during all pollution episode cases were OA and NO<sub>3</sub><sup>-</sup>; with fractions of 26–40% and 23–32%, respectively. Their high  
362 abundances could be explained by the significant reduction of SO<sub>2</sub> emissions by because of the prohibiting of burning  
363 bulk coals and executing the “Coal-to-Natural Gas” policy in recent years (Meng et al., 2022). In this study, eight  
364 pollution episodes (donated as EP1-EP8) were classified into three types: The first type was dominated by biomass  
365 burning (30–40%) (EP1, EP4, and EP8). The second type was dominated by secondary nitrate plus sulfate secondary  
366 formation source (61–70%) (EP5, EP6, and EP7). The two remaining pollution episodes were mutually contributed  
367 by both primary and secondary sources (EP2 and EP3), in which secondary nitrate plus sulfate secondary formation  
368 source (34–39%) and biomass burning (23–24%) were the two dominant contributors to PM<sub>2.5</sub>.

369 To ~~profoundly understand~~gain insights into the ~~progress~~process of pollution episodes, three typical pollution events  
370 were chosen for detailed discussion (i.e., EP2 in Xi'an, EP4 in Shijiazhuang, and EP7 in Beijing) based on the validity  
371 and integrity of the data and the representativeness of the selected pollution events. The two-stage evolution was  
372 distinguished for EP4 as an example of the first type of episode (Fig. S16). ~~For the first type of episode represented~~  
373 ~~by EP4 (Fig. S14), a two-stages evolution was distinguished.~~ At Stage 1, the PM<sub>2.5</sub> mass concentrations rapidly  
374 increased from 7 to 82  $\mu\text{g m}^{-3}$  under stable weather conditions inferring by low wind speed ( $1.8\pm 0.8\text{ m s}^{-1}$ , Fig.  
375 ~~S14b~~S16b), in which the concentrations (fractions) of biomass burning increased from 0.6  $\mu\text{g m}^{-3}$  (7%) to 36.7  $\mu\text{g m}^{-3}$   
376 (55%) due to heating ~~demand~~activities during nighttime. Meanwhile, the chemical composition was relatively  
377 stable and dominated by OA ( $31\pm 5\%$ ) and  $\text{NO}_3^-$  ( $21\pm 5\%$ ). At Stage 2, the PM<sub>2.5</sub> mass concentration continuously  
378 increased to 105  $\mu\text{g m}^{-3}$  in a few hours along with the most notable abundance of the source of ~~secondary nitrate plus~~  
379 ~~sulfate~~secondary formation source, which concentration (contribution) rapidly increased from 2.3  $\mu\text{g m}^{-3}$  (4%) to  
380 54.4  $\mu\text{g m}^{-3}$  (52%) (Fig. ~~S14g~~S16g and h). This is due to the aqueous-phase reactions effect inferring by the rapid  
381 increase in ALWC (from 16  $\mu\text{g m}^{-3}$  to 78  $\mu\text{g m}^{-3}$ , Fig. ~~S14e~~S16c) and RH (from 51% to 79%, Fig. ~~S14a~~S16a).

382 In contrast, a three-stages evolution was discriminated for the second type of episode, using EP7 as an example (Fig.  
383 ~~S15~~S17). At Stage 1, the PM<sub>2.5</sub> concentration gradually increased from 11 to 30  $\mu\text{g m}^{-3}$ , as well as  $\text{NO}_2$  (from 15 to  
384 59  $\mu\text{g m}^{-3}$ , Fig. ~~S15d~~S17d) due to the boosts of the predominant contributions of vehicle emission and biomass  
385 burning (Fig. ~~S15g~~S17g and h). In the meantime, the contribution of coal combustion also slowly increased along  
386 with  $\text{SO}_2$  (Fig. ~~S15d~~S17d and h). At Stage 2, under the lowest average wind speed in the study period ( $0.7\pm 0.4\text{ m s}^{-1}$ , Fig. ~~S15b~~S17b),  
387 the PM<sub>2.5</sub> mass concentrations moderately increased from 30 to 91  $\mu\text{g m}^{-3}$  with relatively stable  
388 chemical composition and source contribution (Fig. ~~S15f~~S17f and h). Compared to Stage 1, the fractions of  $\text{NO}_3^-$   
389 increased mostly from  $9\pm 3\%$  to  $23\pm 3\%$ , this is probably influenced by photochemical oxidations inferring by relative  
390 high  $\text{O}_x$  and  $\text{NO}_2$  concentration (Fig. ~~S15e~~S17c and d). At Stage 3, the PM<sub>2.5</sub> mass concentration rapidly rose to 142  
391  $\mu\text{g m}^{-3}$  and then remained stable. Furthermore, the ~~In which~~ greatest increase of sources ~~the~~ concentrations  
392 ~~(fractions~~contribution) ~~of~~ was ~~secondary nitrate plus sulfate~~secondary formation source increased mostly from 18.9  
393  $\mu\text{g m}^{-3}$  (48%) to 120.6  $\mu\text{g m}^{-3}$  (80%). This might be due to the occurrence of an aqueous-phase reaction, which was  
394 indicated by the elevation of RH and ALWC (Fig. ~~S15a~~S17a and c).

395 Figure S16 illustrates the third type of episode using EP2 as an example, while in which a four-stages evolution was  
396 resolved. At Stage 1, the PM<sub>2.5</sub> mass concentration ( $14\pm 3\text{ }\mu\text{g m}^{-3}$ ) was relatively low and dominated by the

397 contributions of ~~secondary nitrate plus sulfate~~secondary formation source ( $43\pm 17\%$ ) and fugitive dust ( $24\pm 8\%$ ), as  
398 well as MD ( $28\pm 7\%$ ) and OA ( $26\pm 7\%$ ). At Stage 2, the  $PM_{2.5}$  mass concentrations promptly increased from 21 to 82  
399  $\mu\text{g m}^{-3}$ , with the two dominant chemical components of OA ( $21.7 \mu\text{g m}^{-3}$ ) and  $\text{NO}_3^-$  ( $17.1 \mu\text{g m}^{-3}$ ). The  $PM_{2.5}$  increases  
400 can be also ~~contributed attributed~~ to the raise of ~~secondary nitrate plus sulfate~~secondary formation source ( $25.3 \mu\text{g}$   
401  $\text{m}^{-3}$ ) and biomass burning ( $14.4 \mu\text{g m}^{-3}$ ). The enhancement of secondary aerosol was probably generated through the  
402 aqueous-phase reaction evidenced by the increase of ALWC and  $\text{NO}_2$  (Fig. ~~S16e~~S18c and d). At Stage 3,  $PM_{2.5}$  mass  
403 continuously increased to  $139 \mu\text{g m}^{-3}$  with a dominant increase of primary sources emission including biomass  
404 burning ( $29.0 \mu\text{g m}^{-3}$ ), vehicle emission ( $21.5 \mu\text{g m}^{-3}$ ) and coal combustion ( $16.5 \mu\text{g m}^{-3}$ ) along with the increases of  
405  $\text{SO}_2$  and  $\text{NO}_2$  as well (Fig. ~~S16~~S18d). The three primary sources contributed  $>60\%$  of the total resolved sources.  
406 Meanwhile, the ~~secondary nitrate plus sulfate~~secondary formation source also increased slowly through aqueous-  
407 phase reaction inferring by increase of ALWC (Fig. ~~S16e~~S18c). At the final Stage 4, the  $PM_{2.5}$  mass concentration  
408 maintained relatively stable with an average of  $142\pm 11 \mu\text{g m}^{-3}$ , dominated by ~~sources of secondary nitrate plus~~  
409 ~~sulfate~~secondary formation source ( $34\pm 6\%$ ) and biomass burning ( $28\pm 6\%$ ); and chemical components of OA ( $36\pm 4\%$ )  
410 and  $\text{NO}_3^-$  ( $25\pm 1\%$ ).

411 In summary, the pollution events occurred in Xi'an was mainly derived by stronger emissions of primary sources  
412 under adverse meteorological conditions, even though the aqueous-phase reaction also contribute to secondary  
413 aerosol formation. In contrast, pollution events occurred in Shijiazhuang and Beijing were mainly influenced by  
414 formation of secondary aerosols through both of aqueous-phase reaction and photochemical oxidation. What's more,  
415 ~~in which~~ aqueous-phase reaction plays a more important role than photochemical oxidation. Hence, to further  
416 improve the air quality in the north of China, primary source emissions should be prioritized for control in the  
417 northwest region, with a focus on biomass burning and coal combustion. In the North China Plain, the priority should  
418 be given to reducing emissions of the precursors from secondary sources, with a focus on  $\text{NO}_x$  and volatile organic  
419 compounds (VOCs).

### 420 3.5 Policy implications

421 In past decades, the air quality in China improved notably under the implementation of air pollution control policies  
422 including APCAP and TAPFAP. The  $PM_{2.5}$  mass in Xi'an, Shijiazhuang and Beijing were the lowest during campaigns  
423 compared with those in last decades (Table ~~S6~~S7). The variations of the chemical composition and the source  
424 contribution of  $PM_{2.5}$  in the three pilot cities are displayed in Fig. 5. As shown, the dominant chemical components



425 of PM<sub>2.5</sub> changed from OA and SO<sub>4</sub><sup>2-</sup>, to OA and NO<sub>3</sub><sup>-</sup> (Fig. 5a–c). This could be attributed to the reduction in coal  
426 consumption due to clean energy replacement and the increase of vehicle ownership, ~~which~~ ~~This~~ ~~lead~~ a decrease of  
427 the SO<sub>2</sub> and an increase of NO<sub>2</sub> (Wang et al., 2013). Since the atmospheric oxidation reaction (i.e., aqueous-phase  
428 reaction and photochemical oxidation) of the precursors (i.e., NO<sub>2</sub>, VOCs) is the primary source for the OA and NO<sub>3</sub><sup>-</sup>  
429 in the atmosphere (Feng et al., 2018; Li et al., 2022; Tao et al., 2016; Yang et al., 2022b; Ziemann and Atkinson,  
430 2012), and it is impossible to avoid, thus, the precursors of OA and NO<sub>3</sub><sup>-</sup> should be reduced from the combustion and  
431 transportation sectors (Fermo et al., 2021; Liu et al., 2022; Wang et al., 2021c; Zhang et al., 2019). In addition, the  
432 fraction of NH<sub>4</sub><sup>+</sup> in PM<sub>2.5</sub> increased with an alarming rate. This is coincidentally in a similar trend of NH<sub>3</sub>. Studies  
433 have reported that controls of NH<sub>4</sub><sup>+</sup> is more effective than that of NO<sub>x</sub> in the reduction of PM<sub>2.5</sub> mass concentrations  
434 (Gu et al., 2021; Zheng et al., 2022). Therefore, collaborative control measures for the emissions of precursors  
435 including NO<sub>x</sub>, VOCs, and NH<sub>3</sub> are necessary.

436 As shown Table ~~S7~~–~~S8~~ and Fig. 5d–f, coal combustion decreased remarkably due to the coal-related policies  
437 implementation including the strength of emissions standards for coal-fired power plants, the change of energy  
438 sources from coal to natural gas in some industrials, and the coal burning was forbidden in the main urban areas  
439 (Shen, 2016; Yang and Teng, 2018). The similar trend was also founded in the results of PM<sub>2.5</sub> source apportionment  
440 in Beijing released by Beijing Municipal Ecology and Environment Bureau (Fig. S19). Meanwhile, the  
441 contribution of industrial emission and vehicle emission decreased slightly because of the improvement of industrial  
442 emission standards (He et al., 2020; Wang et al., 2020a) and the traffic-related policy implementation such as the  
443 strength of vehicle emission standards, improvement of fuel quality, and elimination of high-emission-vehicles. This  
444 resulted in the reduction of the precursor gases and PM<sub>2.5</sub> from vehicles (Feng et al., 2021; Fontaras et al., 2012; Jin  
445 et al., 2012). However, the emission of biomass burning did not show a significant reduction in recent years, and its  
446 contribution increased from 9% in 2014 to 25% in 2020 (Xi'an), from 3% in 2015 to 24% in 2022 (Shijiazhuang),  
447 and from 6% in 2013 to 18% in 2021 (Beijing) (Fig. 5d–f). This is likely because biomass burning is an open source,  
448 which makes it more difficult to control compare with other primary sources. Biomass used for residential heating in  
449 rural areas is still frequently occurred (Ren, 2021; Tian et al., 2022; Yang et al., 2022a; Zhang et al., 2017). Hence,  
450 the clean energy revolution should be promoted urgently especially in the entire regions in northwest China. Moreover,  
451 the contributions of secondary formation sources increased, it is potentially explained by the high reduction rate of  
452 primary emissions and the improvement of atmospheric oxidation capacity (Chen et al., 2020a; Feng et al., 2020).  
453 Therefore, more control measures should focus on weakening the ~~atmosphere~~atmospheric oxidation capacity, such

454 as reduction of O<sub>3</sub> formation, to reduce the formation of secondary pollutants which are now identified as the most  
455 critical drivers of pollution. Considering those factors, it is also important to promote the mitigation of *both* PM<sub>2.5</sub>  
456 and O<sub>3</sub>.

#### 457 **4. Conclusion**

458 The intensive real-time measurement campaigns about PM<sub>2.5</sub> chemical components were conducted in Xi'an,  
459 Shijiazhuang, and Beijing during the wintertime respectively. Chemical compositions of PM<sub>2.5</sub> in the three cities were  
460 all dominated by OA (26.9–34.2%) and NO<sub>3</sub><sup>-</sup> (23.6–26.5%). Six sources of PM<sub>2.5</sub> in Xi'an and Shijiazhuang were  
461 resolved by HERM and their contributions were similar, with a descending order of ~~secondary nitrate plus~~  
462 ~~sulfate~~secondary formation source (32.2–37.6%), biomass burning (24.4–24.6 %), coal combustion (15.1–16.0%),  
463 vehicle emission (12.2–12.5 %), industrial emission (5.5–7.7%) and fugitive dust (4.4–7.8%). However, the  
464 secondary nitrate (29.0%) and the secondary sulfate (23.0%) were separately resolved and relatively more important  
465 in Beijing. In addition, the contribution of firework (7.9%) to PM<sub>2.5</sub> was found during the Chinese Spring Festival.

466 The possible formation mechanism of ~~secondary nitrate plus sulfate~~secondary formation source in three pilot cities  
467 was explored. The results showed that secondary aerosols were generated by both photochemical oxidation and  
468 aqueous-phase reaction. Meanwhile, the formation rate of secondary aerosols in Beijing was higher than that in Xi'an  
469 and Shijiazhuang. Furthermore, the eight pollution episodes within the sampling periods were categorized three types  
470 and characterized respectively. The dominant chemical compositions of PM<sub>2.5</sub> were OA (26–40%) and NO<sub>3</sub><sup>-</sup> (23–  
471 32%) during all pollution episodes. Furthermore, ~~secondary nitrate plus sulfate~~secondary formation source and  
472 biomass burning were two major drivers of the pollution.

473 The dominant chemical components of PM<sub>2.5</sub> in pilot cities have changed from OA and SO<sub>4</sub><sup>2-</sup> to OA and NO<sub>3</sub><sup>-</sup> under  
474 the implementation of a clean air plan in past decades. This indicates that reduction of precursors including NO<sub>2</sub> and  
475 VOCs should be a key task in the future. In addition, the contribution of biomass burning increased, especially in  
476 Xi'an. This indicates that clean energy for heating activities in rural areas in northwest China is still insufficient.  
477 Furthermore, to weaken the ~~atmosphere~~atmospheric oxidation capacity for reducing the contribution of ~~secondary~~  
478 ~~nitrate plus sulfate~~secondary formation source, it is necessary to promote the collaborative control on ozone and  
479 particulate matter.

480 *Data availability.* Data used to support the findings in this study are archived at the Institute of Earth Environment,

481 Chinese Academy of Sciences, and are publicly available at <https://doi.org/10.5281/zenodo.73367448106655>.

482 *Competing interest.* The authors declare that they have no conflict of interest.

483 *Author contributions.* QW, YH, JC designed the campaigns. WR and YZ conducted the field measurements. YZ, JT,  
484 HL, LQ and TC performed data analysis and interpretation. MM, KRD, JGS and ASHP were involved supervision  
485 and review. YZ wrote the paper with contributions from all co-authors.

486 *Acknowledgments.* The authors are grateful to the staff from Guanzhong Plain, Eco-environmental Change and  
487 Comprehensive Treatment, National Observation and Research Station; Tower Branch of Institute of Atmospheric  
488 Physics, Chinese Academy Sciences; and Hebei Sailhero Environmental Protection High-tech Co., Ltd. for their  
489 assistance with field sampling.

490 *Financial support.* This work was financially supported by the Sino-Swiss Cooperation on Air Pollution for Better  
491 Air (7F-09802.01.02) from the Swiss Agency for Development and Cooperation (SDC), the National Key R&D  
492 Program of China (2022YFF0802501), and the Youth Innovation Promotion Association of the Chinese Academy of  
493 Sciences (2019402). Natural Science Basic Research Program of Shaanxi (2022JQ-267)

494

495

**References:**

- 496 Adachi, K. and Tainosho, Y.: Characterization of heavy metal particles embedded in tire dust, *Environ. Int.*, 30, 1009–  
497 1017, <https://doi.org/10.1016/j.envint.2004.04.004>, 2004.
- 498 Ålander, T., Antikainen, E., Raunemaa, T., Elonen, E., Rautiola, A., and Torkkell, K.: Particle emissions from a small  
499 Two-Stroke engine: Effects of fuel, lubricating oil, and exhaust aftertreatment on particle characteristics, *Aerosol*  
500 *Sci. Technol.*, 39, 151–161, <https://doi.org/10.1080/027868290910224>, 2005.
- 501 Cao, J. J. and Cui, L.: Current status, characteristics and causes of particulate air pollution in the Fenwei Plain, China:  
502 A Review, *J. Geophys. Res-Atmos.*, 126, <https://doi.org/10.1029/2020JD034472>, 2021.
- 503 Chan, C. K. and Yao, X.: Air pollution in mega cities in China, *Atmos. Environ.*, 42, 1–42,  
504 <https://doi.org/10.1016/j.atmosenv.2007.09.003>, 2008.
- 505 Chen, L.-W. A. and Cao, J. J.: PM<sub>2.5</sub> source apportionment using a hybrid environmental receptor model, *Environ.*  
506 *Sci. Technol.*, 52, 6357–6369, <https://doi.org/10.1021/acs.est.8b00131>, 2018.
- 507 Chen, Q., Hua, X., Li, J. W., Chang, T., and Wang, Y.: Diurnal evolutions and sources of water-soluble chromophoric  
508 aerosols over Xi'an during haze event, in Northwest China, *Sci. Total Environ.*, 786, 147412,  
509 <https://doi.org/10.1016/j.scitotenv.2021.147412>, 2021.
- 510 Chen, S., Wang, H., Lu, K., Zeng, L., Hu, M., and Zhang, Y.: The trend of surface ozone in Beijing from 2013 to  
511 2019: Indications of the persisting strong atmospheric oxidation capacity, *Atmos. Environ.*, 242, 117801,  
512 <https://doi.org/10.1016/j.atmosenv.2020.117801>, 2020a.
- 513 Chen, Z., Chen, D., Zhao, C., Kwan, M., Cai, J., Zhuang, Y., Zhao, B., Wang, X., Chen, B., Yang, J., Li, R., He, B.,  
514 Gao, B., Wang, K., and Xu, B.: Influence of meteorological conditions on PM<sub>2.5</sub> concentrations across China: A  
515 review of methodology and mechanism, *Environ. Int.*, 139, 105558,  
516 <https://doi.org/10.1016/j.envint.2020.105558>, 2020b.
- 517 Chow, J. C., Lowenthal, D. H., Chen, L.-W. A., Wang, X., and Watson, J. G.: Mass reconstruction methods for PM<sub>2.5</sub>:  
518 a review, *Air Qual. Atmos. Health*, 8, 243–263, <https://doi.org/10.1007/s11869-015-0338-3>, 2015.
- 519 Dai, Q., Liu, B., Bi, X., Wu, J., Liang, D., Zhang, Y., Feng, Y., and Hopke, P. K.: Dispersion normalized PMF provides  
520 insights into the significant changes in source contributions to PM<sub>2.5</sub> after the COVID-19 outbreak, *Environ. Sci.*  
521 *Technol.*, 54, 9917–9927, <https://doi.org/10.1021/acs.est.0c02776>, 2020.
- 522 DeCarlo, P. F., Ulbrich, I. M., Crouse, J., de Foy, B., Dunlea, E. J., Aiken, A. C., Knapp, D., Weinheimer, A. J.,  
523 Campos, T., Wennberg, P. O., and Jimenez, J. L.: Investigation of the sources and processing of organic aerosol  
524 over the Central Mexican Plateau from aircraft measurements during MILAGRO, *Atmos. Chem. Phys.*, 10,  
525 5257–5280, <https://doi.org/10.5194/acp-10-5257-2010>, 2010.
- 526 Drinovec, L., Močnik, G., Zotter, P., Prévôt, A. S. H., Ruckstuhl, C., Coz, E., Rupakheti, M., Sciare, J., Müller, T.,  
527 Wiedensohler, A., and Hansen, A. D. A.: The “dual-spo” Aethalometer: an improved measurement of aerosol  
528 black carbon with real-time loading compensation, *Atmos. Meas. Tech.*, 8, 1965–1979,  
529 <https://doi.org/10.5194/amt-8-1965-2015>, 2015.

- 530 Duan, J. and Tan, J.: Atmospheric heavy metals and Arsenic in China: Situation, sources and control policies, *Atmos.*  
531 *Environ.*, 74, 93–101, <https://doi.org/10.1016/j.atmosenv.2013.03.031>, 2013.
- 532 Elser, M., Huang, R.-J., Wolf, R., Slowik, J. G., Wang, Q.-Y., Canonaco, F., Li, G. H., Bozzetti, C., Daellenbach, K.  
533 R., Huang, Y., Zhang, R.-J., Li, Z.-Q., Cao, J. J., Baltensperger, U., El-Haddad, I., and Prévôt, A. S. H.: New  
534 insights into PM<sub>2.5</sub> chemical composition and sources in two major cities in China during extreme haze events  
535 using aerosol mass spectrometry, *Aerosols/Field Measurements/Troposphere/Chemistry (chemical composition*  
536 *and reactions)*, <https://doi.org/10.5194/acpd-15-30127-2015>, 2015.
- 537 Ervens, B., Turpin, B. J., and Weber, R. J.: Secondary organic aerosol formation in cloud droplets and aqueous  
538 particles (aqSOA): a review of laboratory, field and model studies, *Atmos. Chem. Phys.*, 11, 11069–11102,  
539 <https://doi.org/10.5194/acp-11-11069-2011>, 2011.
- 540 Feng, T., Bei, N., Zhao, S., Wu, J. rui, Li, X., Zhang, T., Cao, J., Zhou, W., and Li, G.: Wintertime nitrate formation  
541 during haze days in the Guanzhong basin, China: A case study, *Environ. Pollut.*, 243, 1057–1067,  
542 <https://doi.org/10.1016/j.envpol.2018.09.069>, 2018.
- 543 Feng, T., Zhao, S., Zhang, X., Wang, Q., Liu, L., Li, G., and Tie, X.: Increasing wintertime ozone levels and secondary  
544 aerosol formation in the Guanzhong basin, central China, *Sci. Total Environ.*, 12, 2020.
- 545 Feng, X., Zhang, X., He, C., and Wang, J.: Contributions of traffic and industrial emission reductions to the air quality  
546 improvement after the lockdown of Wuhan and neighboring Cities due to COVID-19, *Toxics*, 9, 358,  
547 <https://doi.org/10.3390/toxics9120358>, 2021.
- 548 Fermo, P., Artíñano, B., De Gennaro, G., Pantaleo, A. M., Parente, A., Battaglia, F., Colicino, E., Di Tanna, G.,  
549 Goncalves da Silva Junior, A., Pereira, I. G., Garcia, G. S., Garcia Goncalves, L. M., Comite, V., and Miani, A.:  
550 Improving indoor air quality through an air purifier able to reduce aerosol particulate matter (PM) and volatile  
551 organic compounds (VOCs): Experimental results, *Environ. Pollut.*, 197, 111131,  
552 <https://doi.org/10.1016/j.envres.2021.111131>, 2021.
- 553 Fontaras, G., Martini, G., Manfredi, U., Marotta, A., Krasenbrink, A., Maffioletti, F., Terenghi, R., and Colombo, M.:  
554 Assessment of on-road emissions of four Euro V diesel and CNG waste collection trucks for supporting air-  
555 quality improvement initiatives in the city of Milan, *Sci. Total Environ.*, 426, 65–72,  
556 <https://doi.org/10.1016/j.scitotenv.2012.03.038>, 2012.
- 557 Fountoukis, C. and Nenes, A.: ISORROPIA II: a computationally efficient thermodynamic equilibrium model for  
558  $K^+Ca^{2+}Mg^{2+}NH_4^+Na^+SO_4^{2-}NO_3^-Cl^-H_2O$  aerosols, *Atmos. Chem. Phys.*, 7, 4639–4659,  
559 <https://doi.org/10.5194/acp-7-4639-2007>, 2007.
- 560 Furger, M., Rai, P., Slowik, J. G., Cao, J., Visser, S., Baltensperger, U., and Prévôt, A. S. H.: Automated alternating  
561 sampling of PM<sub>10</sub> and PM<sub>2.5</sub> with an online XRF spectrometer, *Atmospheric Environment: X*, 5, 100065,  
562 <https://doi.org/10.1016/j.aeaoa.2020.100065>, 2020.
- 563
- 564 Gu, B., Zhang, L., Van Dingenen, R., Vieno, M., Van Grinsven, H. J., Zhang, X., Zhang, S., Chen, Y., Wang, S., Ren,  
565 C., Rao, S., Holland, M., Winiwarter, W., Chen, D., Xu, J., and Sutton, M. A.: Abating ammonia is more cost-  
566 effective than nitrogen oxides for mitigating PM<sub>2.5</sub> air pollution, *Science*, 374, 758–762,

567 <https://doi.org/10.1126/science.abf8623>, 2021.

568 Guo, Y., Lin, C., Li, J., Wei, L., Yang, Y., Yang, Q., Li, D., Wang, H., and Shen, J.: Persistent pollution episodes,  
569 transport pathways, and potential sources of air pollution during the heating season of 2016–2017 in Lanzhou,  
570 China, *Environ. Monit. Assess.*, 193, 852, <https://doi.org/10.1007/s10661-021-09597-8>, 2021.

571 He, J., Zhao, M., Zhang, B., Wang, P., Zhang, D., Wang, M., Liu, B., Li, N., Yu, K., Zhang, Y., Zhou, T., and Jing, B.:  
572 The impact of steel emissions on air quality and pollution control strategy in Caofeidian, North China, *Atmos.*  
573 *Pollut. Res.*, 11, 1238–1247, <https://doi.org/10.1016/j.apr.2020.04.012>, 2020.

574 He, K., Huo, H., and Zhang, Q.: Urban air pollution in China: Current status, characteristics, and progress, *Annu.*  
575 *Rev. Energy. Environ.*, 27, 397–431, <https://doi.org/10.1146/annurev.energy.27.122001.083421>, 2002.

576 Hu, W. wei, Campuzano-Jost, P., Day, D. A., Croteau, P., Canagaratna, M. R., Jayne, J. T., Worsnop, D. R., and  
577 Jimenez, J. L.: Evaluation of the new capture vapourizer for aerosol mass spectrometers (AMS) through  
578 laboratory studies of inorganic species, *Atmos. Meas. Tech.*, 10, 2897–2921, [https://doi.org/10.5194/amt-10-](https://doi.org/10.5194/amt-10-2897-2017)  
579 [2897-2017](https://doi.org/10.5194/amt-10-2897-2017), 2017.

580 Huang, R.-J., He, Y., Duan, J., Li, Y., Chen, Q., Zheng, Y., Chen, Y., Hu, W., Lin, C., Ni, H., Dai, W., Cao, J., Wu, Y.,  
581 Zhang, R., Xu, W., Ovadnevaite, J., Ceburnis, D., Hoffmann, T., and O’Dowd, C. D.: Contrasting sources and  
582 processes of particulate species in haze days with low and high relative humidity in wintertime Beijing, *Atmos.*  
583 *Chem. Phys.*, 20, 9101–9114, <https://doi.org/10.5194/acp-20-9101-2020>, 2020.

584 Huang, R.-J., Zhang, Y., Bozzetti, C., Ho, K.-F., Cao, J.-J., Han, Y., Daellenbach, K. R., Slowik, J. G., Platt, S. M.,  
585 Canonaco, F., Zotter, P., Wolf, R., Pieber, S. M., Bruns, E. A., Crippa, M., Ciarelli, G., Piazzalunga, A.,  
586 Schwikowski, M., Abbaszade, G., Schnelle-Kreis, J., Zimmermann, R., An, Z., Szidat, S., Baltensperger, U.,  
587 Haddad, I. E., and Prévôt, A. S. H.: High secondary aerosol contribution to particulate pollution during haze  
588 events in China, *Nature*, 514, 218–222, <https://doi.org/10.1038/nature13774>, 2014.

589 Huang, X., Liu, Z., Liu, J., Hu, B., Wen, T., Tang, G., Zhang, J., Wu, F. kun, Ji, D., Wang, L., and Wang, Y.: Chemical  
590 characterization and source identification of PM<sub>2.5</sub> at multiple sites in the Beijing–Tianjin–Hebei region, China,  
591 *Atmos. Chem. Phys.*, 17, 12941–12962, <https://doi.org/10.5194/acp-17-12941-2017>, 2017.

592 Huang, R.-J., Wang, Y., Cao, J., Lin, C., Duan, J., Chen, Q., Li, Y., Gu, Y., Yan, J., Xu, W., Fröhlich, R., Canonaco,  
593 F., Bozzetti, C., Ovadnevaite, J., Ceburnis, D., Canagaratna, M. R., Jayne, J., Worsnop, D. R., El-Haddad, I.,  
594 Prévôt, A. S. H., and O’Dowd, C. D.: Primary emissions versus secondary formation of fine particulate matter  
595 in the most polluted city (Shijiazhuang) in North China, *Atmos. Chem. Phys.*, 19, 2283–2298,  
596 <https://doi.org/10.5194/acp-19-2283-2019>, 2019.

597

598 Huang, X., Zhang, J., Luo, B., Luo, J., Zhang, W., and Rao, Z.: Characterization of oxalic acid-containing particles  
599 in summer and winter seasons in Chengdu, China, *Atmos. Environ.*, 198, 133–141,  
600 <https://doi.org/10.1016/j.atmosenv.2018.10.050>, 2019.

601 Jin, T. sheng, Gao, J. jia, Fu, L. xin, Ai, Y., and Xu, X. H.: An evaluation of improvements in the air quality of Beijing  
602 arising from the use of new vehicle emission standards, *Environ. Monit. Assess.*, 184, 2151–2159,  
603 <https://doi.org/10.1007/s10661-011-2106-7>, 2012.

604 Khan, M. A. H., Ashfold, M. J., Nickless, G., Martin, D., Watson, L. A., Hamer, P. D., Wayne, R. P., Canosa-Mas, C.  
605 E., and Shallcross, D. E.: Night-time NO<sub>3</sub> and OH radical concentrations in the United Kingdom inferred from  
606 hydrocarbon measurements, *Atmos. Sci. Lett.*, 9, 140–146, <https://doi.org/10.1002/asl.175>, 2008.

607 Kuniyal, J. C. and Guleria, R. P.: The current state of aerosol-radiation interactions: A mini review, *J. Aerosol Sci.*,  
608 130, 45–54, <https://doi.org/10.1016/j.jaerosci.2018.12.010>, 2019.

609 Kuo, C.-Y., Cheng, F.-C., Chang, S.-Y., Lin, C.-Y., Chou, C. C. K., Chou, C.-H., and Lin, Y.-R.: Analysis of the major  
610 factors affecting the visibility degradation in two stations, *J. Air Waste Manage.*, 63, 433–441,  
611 <https://doi.org/10.1080/10962247.2012.762813>, 2013.

612 Ledoux, F., Kfoury, A., Delmaire, G., Roussel, G., El Zein, A., and Courcot, D.: Contributions of local and regional  
613 anthropogenic sources of metals in PM<sub>2.5</sub> at an urban site in northern France, *Chemosphere*, 181, 713–724,  
614 <https://doi.org/10.1016/j.chemosphere.2017.04.128>, 2017.

615 Lewis, C. W., Norris, G. A., Conner, T. L., and Henry, R. C.: Source apportionment of Phoenix PM<sub>2.5</sub> aerosol with  
616 the Unmix receptor model, *J. Air Waste Manage.*, 53, 325–338,  
617 <https://doi.org/10.1080/10473289.2003.10466155>, 2003.

618 Li, J., Du, H., Wang, Z., Sun, Y., Yang, W., He, J., Tang, X., and Fu, P.: Rapid formation of a severe regional winter  
619 haze episode over a mega-city cluster on the North China Plain, *Environ. Pollut.*, 223, 605–615,  
620 <https://doi.org/10.1016/j.envpol.2017.01.063>, 2017a.

621

622 Li, J., Gao, W., Cao, L., Xiao, Y., Zhang, Y., Zhao, S., Liu, Z., Liu, Z., Tang, G., Ji, D., Hu, B., Song, T., He, L., Hu,  
623 M., and Wang, Y.: Significant changes in autumn and winter aerosol composition and sources in Beijing from  
624 2012 to 2018: Effects of clean air actions, *Environ. Pollut.*, 268, 115855,  
625 <https://doi.org/10.1016/j.envpol.2020.115855>, 2021a.

626 Li, K., Zhang, X., Zhao, B., Bloss, W. J., Lin, C., White, S., Yu, H., Chen, L., Geng, C., Yang, W., Azzi, M., George,  
627 C., and Bai, Z.: Suppression of anthropogenic secondary organic aerosol formation by isoprene, *npj Clim. Atmos.*  
628 *Sci.*, 5, 12, <https://doi.org/10.1038/s41612-022-00233-x>, 2022.

629 Li, L., Tan, Q., Zhang, Y., Feng, M., Qu, Y., An, J., and Liu, X.: Characteristics and source apportionment of PM<sub>2.5</sub>  
630 during persistent extreme haze events in Chengdu, southwest China, *Environ. Pollut.*, 230, 718–729,  
631 <https://doi.org/10.1016/j.envpol.2017.07.029>, 2017b.

632 Li, W., Shao, L. yi, Wang, W., Li, H., Wang, X., Li, Y., Li, W., Jones, T., and Zhang, D.: Air quality improvement in  
633 response to intensified control strategies in Beijing during 2013–2019, *Sci. Total Environ.*, 744, 140776,  
634 <https://doi.org/10.1016/j.scitotenv.2020.140776>, 2020.

635 Li, X., Bei, N., Tie, X., Wu, J., Liu, S., Wang, Q., Liu, L., Wang, R., and Li, G.: Local and transboundary transport  
636 contributions to the wintertime particulate pollution in the Guanzhong Basin (GZB), China: A case study, *Sci.*  
637 *Total Environ.*, 797, 148876, <https://doi.org/10.1016/j.scitotenv.2021.148876>, 2021b.

638 Li, Y., Sun, Y., Zhang, Q., Li, X., Li, M., Zhou, Z., and Chan, C. K.: Real-time chemical characterization of  
639 atmospheric particulate matter in China: A review, *Atmos. Environ.*, 158, 270–304,

- 640 <https://doi.org/10.1016/j.atmosenv.2017.02.027>, 2017c.
- 641 Liu, J., Chen, Y., Chao, S., Cao, H., Zhang, A., Yang, Y.: Emission control priority of PM<sub>2.5</sub>-bound heavy metals in  
642 different seasons: A comprehensive analysis from health risk perspective, *Sci. Total Environ.*, 644, 20-30.  
643 <https://doi.org/10.1016/j.scitotenv.2018.06.226>, 2018a.
- 644 Liu, B., Cheng, Y., Zhou, M., Liang, D., Dai, Q., Wang, L., Jin, W., Zhang, L., Ren, Y., Zhou, J., Dai, C., Xu, J.,  
645 Wang, J., Feng, Y., and Zhang, Y.: Effectiveness evaluation of temporary emission control action in 2016 in  
646 winter in Shijiazhuang, China, *Atmos. Chem. Phys.*, 18, 7019–7039, <https://doi.org/10.5194/acp-18-7019-2018>,  
647 2018b.
- 648 Liu, J., Chu, B., Jia, Y., Cao, Q., Zhang, H., Chen, T., Ma, Q., Ma, J., Wang, Y., Zhang, P., and He, H.: Dramatic  
649 decrease of secondary organic aerosol formation potential in Beijing: Important contribution from reduction of  
650 coal combustion emission, *Sci. Total Environ.*, 832, 155045, <https://doi.org/10.1016/j.scitotenv.2022.155045>,  
651 2022.
- 652 Liu, Y., Zheng, M., Yu, M., Cai, X., Du, H., Li, J., Zhou, T., Yan, C., Wang, X., Shi, Z., Harrison, R. M., Zhang, Q.,  
653 and He, K.: High-time-resolution source apportionment of PM<sub>2.5</sub> in Beijing with multiple models, *Atmos. Chem.*  
654 *Phys.*, 19, 6595–6609, <https://doi.org/10.5194/acp-19-6595-2019>, 2019.
- 655 Liu, Z., Wang, Y., Hu, B., Ji, D., Zhang, J., Wu, F., Wan, X., and Wang, Y.: Source appointment of fine particle number  
656 and volume concentration during severe haze pollution in Beijing in January 2013, *Environ. Sci. Pollut. Res.*,  
657 23, 6845–6860, <https://doi.org/10.1007/s11356-015-5868-6>, 2016.
- 658
- 659 Long, X., Li, N., Tie, X., Cao, J., Zhao, S., Huang, R., Zhao, M., Li, G., and Feng, T.: Urban dust in the Guanzhong  
660 Basin of China, part I: A regional distribution of dust sources retrieved using satellite data, *Sci. Total Environ.*,  
661 541, 1603–1613, <https://doi.org/10.1016/j.scitotenv.2015.10.063>, 2016.
- 662 Lu, J., Ge, P., Zhao, Y.: Recent development of effect mechanism of alloying elements in titanium alloy design, *Rare*  
663 *Metal Mat. Eng.*, 43, 775-779. [https://doi.org/10.1016/S1875-5372\(14\)60082-5](https://doi.org/10.1016/S1875-5372(14)60082-5), 2014.
- 664 Lu, W., Tian, Q., Xu, R., Qiu, L., Fan, Z., Wang, S., Liu, T., Huang, J., Li, Y., Wang, Y., Shi, C., Liu, Y., and Zhou,  
665 Y.: Ambient air pollution and hospitalization for chronic obstructive pulmonary disease: Benefits from Three-  
666 Year Action Plan, *Ecotoxicol. Environ. Saf.*, 228, 113034, <https://doi.org/10.1016/j.ecoenv.2021.113034>, 2021.
- 667 Lv, B., Zhang, B., and Bai, Y.: A systematic analysis of PM<sub>2.5</sub> in Beijing and its sources from 2000 to 2012, *Atmos.*  
668 *Environ.*, 124, 98–108, <https://doi.org/10.1016/j.atmosenv.2015.09.031>, 2016.
- 669 Lv, L., Chen, Y., Han, Y., Cui, M., Wei, P., Zheng, M., and Hu, J.: High-time-resolution PM<sub>2.5</sub> source apportionment  
670 based on multi-model with organic tracers in Beijing during haze episodes, *Sci. Total Environ.*, 772, 144766,  
671 <https://doi.org/10.1016/j.scitotenv.2020.144766>, 2021.
- 672 Ma, Y., Huang, Y., Wu, J., E, J., Zhang, B., Han, D., and Ong, H. C.: A review of atmospheric fine particulate matters:  
673 chemical composition, source identification and their variations in Beijing, *Energ. Source. Part A*, 44, 4783–  
674 4807, <https://doi.org/10.1080/15567036.2022.2075991>, 2022.



- 675 Meng, H., Shen, Y., Fang, Y., and Zhu, Y.: Impact of the ‘Coal-to-Natural Gas’ Policy on Criteria Air Pollutants in  
676 Northern China, *Atmosphere*, 13, 945, <https://doi.org/10.3390/atmos13060945>, 2022.
- 677 Meng, J., Wang, G., Li, J., Cheng, C., Ren, Y., Huang, Y., Cheng, Y., Cao, J., and Zhang, T.: Seasonal characteristics  
678 of oxalic acid and related SOA in the free troposphere of Mt. Hua, central China: Implications for sources and  
679 formation mechanisms, *Sci. Total Environ.*, 493, 1088–1097, <https://doi.org/10.1016/j.scitotenv.2014.04.086>,  
680 2014.
- 681 Ng, N. L., Herndon, S. C., Trimborn, A., Canagaratna, M. R., Croteau, P. L., Onasch, T. B., Sueper, D., Worsnop, D.  
682 R., Zhang, Q., Sun, Y. L., and Jayne, J. T.: An Aerosol Chemical Speciation Monitor (ACSM) for Routine  
683 Monitoring of the Composition and Mass Concentrations of Ambient Aerosol, *Aerosol Sci. Technol.*, 45, 780–  
684 794, <https://doi.org/10.1080/02786826.2011.560211>, 2011.
- 685 Ni, H., Tian, J., Wang, X., Wang, Q., Han, Y., Cao, J., Long, X., Chen, L.-W. A., Chow, J. C., Watson, J. G., Huang,  
686 R.-J., and Dusek, U.: PM<sub>2.5</sub> emissions and source profiles from open burning of crop residues, *Atmos. Environ.*,  
687 169, 229–237, <https://doi.org/10.1016/j.atmosenv.2017.08.063>, 2017.
- 688 Ouyang, J., Song, L.-J., Ma, L.-L., Luo, M., Dai, X.-X., Zhang, J.-T., and Xu, D.-D.: Quantification of secondary  
689 particle loading during a heavy air pollution event in Beijing: A simplified method based on coal emission  
690 indicators, *Atmos. Environ.*, 215, 116896, <https://doi.org/10.1016/j.atmosenv.2019.116896>, 2019.
- 691 Pant, P. and Harrison, R.M.: Estimation of the contribution of road traffic emissions to particulate matter  
692 concentrations from field measurements: A review, *Atmos. Environ.*, 77, 78-97.  
693 <https://doi.org/10.1016/j.atmosenv.2013.04.028>, 2013.
- 694 Pang, N., Gao, J., Zhu, G., Hui, L., Zhao, P., Xu, Z., Tang, W., and Chai, F.: Impact of clean air action on the PM<sub>2.5</sub>  
695 pollution in Beijing, China: Insights gained from two heating seasons measurements, *Chemosphere*, 263,  
696 127991, <https://doi.org/10.1016/j.chemosphere.2020.127991>, 2021.
- 697 Pöschl, U.: Atmospheric Aerosols: Composition, Transformation, Climate and Health Effects, *Angew. Chem. Int. Ed.*,  
698 44, 7520–7540, <https://doi.org/10.1002/anie.200501122>, 2005.
- 699 Pui, D. Y. H., Chen, S.-C., and Zuo, Z.: PM<sub>2.5</sub> in China: Measurements, sources, visibility and health effects, and  
700 mitigation, *Particuology*, 13, 1–26, <https://doi.org/10.1016/j.partic.2013.11.001>, 2014.
- 701 Rai, P., Furger, M., Slowik, J. G., Canonaco, F., Fröhlich, R., Hüglin, C., Minguillón, M. C., Petterson, K.,  
702 Baltensperger, U., and Prévôt, A. S. H.: Source apportionment of highly time-resolved elements during a  
703 firework episode from a rural freeway site in Switzerland, *Atmos. Chem. Phys.*, 20, 1657–1674,  
704 <https://doi.org/10.5194/acp-20-1657-2020>, 2020.
- 705 Ren, Y.: Chemical components and source identification of PM<sub>2.5</sub> in non-heating season in Beijing: The influences  
706 of biomass burning and dust, *Atmos. Res.*, 8, 2021.
- 707 Shen, G.: Changes from traditional solid fuels to clean household energies – Opportunities in emission reduction of  
708 primary PM<sub>2.5</sub> from residential cookstoves in China, *Biomass     —Bioenerg.*, 86, 28–35,  
709 <https://doi.org/10.1016/j.biombioe.2016.01.004>, 2016.

- 710 Shen, W.-T., Yu, X., Zhong, S.-B., and Ge, H.-R.: Population Health Effects of Air Pollution: Fresh Evidence From  
711 China Health and Retirement Longitudinal Survey, *Front. Public Health*, 9, 779552,  
712 <https://doi.org/10.3389/fpubh.2021.779552>, 2021.
- 713 Shen, Z., Sun, J., Cao, J., Zhang, L., Zhang, Q., Lei, Y., Gao, J., Huang, R.-J., Liu, S., Huang, Y., Zhu, C., Xu, H.,  
714 Zheng, C., Liu, P., and Xue, Z.: Chemical profiles of urban fugitive dust PM<sub>2.5</sub> samples in Northern Chinese  
715 cities, *Sci. Total Environ.*, 569–570, 619–626, <https://doi.org/10.1016/j.scitotenv.2016.06.156>, 2016.
- 716 Simka, H., Shankar, S., Duran, C., and Haverty, M.: Fundamentals of Cu/Barrier-Layer Adhesion in Microelectronic  
717 Processing, *MRS Proc.*, 863, B9.2, <https://doi.org/10.1557/PROC-863-B9.2>, 2005.
- 718 Tao, J., Zhang, L., Cao, J., and Zhang, R.: A review of current knowledge concerning PM<sub>2.5</sub> chemical composition,  
719 aerosol optical properties and their relationships across China, *Atmos. Chem. Phys.*, 17, 9485–9518,  
720 <https://doi.org/10.5194/acp-17-9485-2017>, 2017. Tao, J., Zhang, L., Zhang, Z., Huang, R., Wu, Y., Zhang, R.,  
721 Cao, J., and Zhang, Y.: Control of PM<sub>2.5</sub> in Guangzhou during the 16th Asian Games period: Implication for  
722 hazy weather prevention, *Sci. Total Environ.*, 508, 57–66, <https://doi.org/10.1016/j.scitotenv.2014.11.074>, 2015.
- 723 Tao, Y., Ye, X., Ma, Z., Xie, Y., Wang, R., Chen, J., Yang, X., and Jiang, S.: Insights into different nitrate formation  
724 mechanisms from seasonal variations of secondary inorganic aerosols in Shanghai, *Atmos. Environ.*, 145, 1–9,  
725 <https://doi.org/10.1016/j.atmosenv.2016.09.012>, 2016.
- 726 Thorpe, A. and Harrison, R. M.: Sources and properties of non-exhaust particulate matter from road traffic: A review,  
727 *Sci. Total Environ.*, 400, 270–282, <https://doi.org/10.1016/j.scitotenv.2008.06.007>, 2008.
- 728 Tian, H. Z., Lu, L., Hao, J. M., Gao, J. J., Cheng, K., Liu, K. Y., Qiu, P. P., and Zhu, C. Y.: A Review of key hazardous  
729 trace elements in Chinese coals: Abundance, occurrence, behavior during coal combustion and their  
730 environmental impacts, *Energ. Fuel.*, 27, 601–614, <https://doi.org/10.1021/ef3017305>, 2013.
- 731 Tian, J., Wang, Q., Zhang, Y., Yan, M., Liu, H., Zhang, N., Ran, W., and Cao, J.: Impacts of primary emissions and  
732 secondary aerosol formation on air pollution in an urban area of China during the COVID-19 lockdown, *Environ.*  
733 *Int.*, 150, 106426, <https://doi.org/10.1016/j.envint.2021.106426>, 2021.
- 734 Tian, J., Wang, Q., Liu, H., Ma, Y., Liu, S., Zhang, Y., Ran, W., Han, Y., and Cao, J.: Measurement report: The  
735 importance of biomass burning in light extinction and direct radiative effect of urban aerosol during the COVID-  
736 19 lockdown in Xi'an, China, *Atmos. Chem. Phys.*, 22, 8369–8384, <https://doi.org/10.5194/acp-22-8369-2022>,  
737 2022.
- 738 Tian, Y. Z., Wang, J., Peng, X., Shi, G. L., and Feng, Y. C.: Estimation of the direct and indirect impacts of fireworks  
739 on the physicochemical characteristics of atmospheric PM<sub>10</sub> and PM<sub>2.5</sub>, *Atmos. Chem. Phys.*, 14, 9469–9479,  
740 <https://doi.org/10.5194/acp-14-9469-2014>, 2014.
- 741 Vu, T. V., Shi, Z., Cheng, J., Zhang, Q., He, K., Wang, S., and Harrison, R. M.: Assessing the impact of clean air  
742 action on air quality trends in Beijing using a machine learning technique, *Atmos. Chem. Phys.*, 19, 11303–  
743 11314, <https://doi.org/10.5194/acp-19-11303-2019>, 2019.
- 744 Wang, C., Li, X., Zhang, T., Tang, A., Cui, M., Liu, X., Ma, X., Zhang, Y., Liu, X., and Zheng, M.: Developing  
745 Nitrogen Isotopic Source Profiles of Atmospheric Ammonia for Source Apportionment of Ammonia in Urban

- 746 Beijing, *Front. Environ. Sci.*, 10, 903013, <https://doi.org/10.3389/fenvs.2022.903013>, 2022a.
- 747 Wang, F., Yu, H., Wang, Z., Liang, W., Shi, G., Gao, J., Li, M., and Feng, Y.: Review of online source apportionment  
748 research based on observation for ambient particulate matter, *Sci. Total Environ.*, 762, 144095,  
749 <https://doi.org/10.1016/j.scitotenv.2020.144095>, 2021a.
- 750 Wang, H. and Zhao, L.: A joint prevention and control mechanism for air pollution in the Beijing-Tianjin-Hebei  
751 region in china based on long-term and massive data mining of pollutant concentration, *Atmos. Environ.*, 174,  
752 25–42, <https://doi.org/10.1016/j.atmosenv.2017.11.027>, 2018.
- 753 Wang, J., Zhao, B., Wang, S., Yang, F., Xing, J., Morawska, L., Ding, A., Kulmala, M., Kerminen, V.-M., Kujansuu,  
754 J., Wang, Z., Ding, D., Zhang, X., Wang, H., Tian, M., Petäjä, T., Jiang, J., and Hao, J.: Particulate matter  
755 pollution over China and the effects of control policies, *Sci. Total Environ.*, 584–585, 426–447,  
756 <https://doi.org/10.1016/j.scitotenv.2017.01.027>, 2017.
- 757 Wang, L., Wang, X., Gu, R., Wang, H., Yao, L., Wen, L., Zhu, F., Wang, W., Xue, L., Yang, L., Lu, K., Chen, J., Wang,  
758 T., Zhang, Y., and Wang, W.: Observations of fine particulate nitrated phenols in four sites in northern China:  
759 concentrations, source apportionment, and secondary formation, *Atmos. Chem. Phys.*, 18, 4349–4359,  
760 <https://doi.org/10.5194/acp-18-4349-2018>, 2018.
- 761 Wang, L. T., Wei, Z., Yang, J., Zhang, Y., Zhang, F. F., Su, J., Meng, C. C., and Zhang, Q.: The 2013 severe haze over  
762 southern Hebei, China: model evaluation, source apportionment, and policy implications, *Atmos. Chem. Phys.*,  
763 14, 3151–3173, <https://doi.org/10.5194/acp-14-3151-2014>, 2014.
- 764 Wang, M., Tian, P., Wang, L., Yu, Z., Du, T., Chen, Q., Guan, X., Guo, Y., Zhang, M., Tang, C., Chang, Y., Shi, J.,  
765 Liang, J., Cao, X., and Zhang, L.: High contribution of vehicle emissions to fine particulate pollutions in  
766 Lanzhou, Northwest China based on high-resolution online data source appointment, *Sci. Total Environ.*, 798,  
767 149310, <https://doi.org/10.1016/j.scitotenv.2021.149310>, 2021b.
- 768 Wang, P., Cao, J., Shen, Z., Han, Y., Lee, S., Huang, Y., Zhu, C., Wang, Q., Xu, H., and Huang, R.: Spatial and  
769 seasonal variations of PM<sub>2.5</sub> mass and species during 2010 in Xi'an, China, *Sci. Total Environ.*, 508, 477–487,  
770 <https://doi.org/10.1016/j.scitotenv.2014.11.007>, 2015.
- 771 Wang, Q., Ye, J., Wang, Y., Zhang, T., Ran, W., Wu, Y., Tian, J., Li, L., Zhou, Y., Hang Ho, S. S., Dang, B., Zhang,  
772 Q., Zhang, R., Chen, Y., Zhu, C., and Cao, J.: Wintertime Optical Properties of Primary and Secondary Brown  
773 Carbon at a Regional Site in the North China Plain, *Environ. Sci. Technol.*, 53, 12389–12397,  
774 <https://doi.org/10.1021/acs.est.9b03406>, 2019.
- 775 Wang, Y., Wang, Q., Ye, J., Yan, M., Qin, Q., Prévôt, A. S. H., and Cao, J.: A Review of Aerosol Chemical  
776 Composition and Sources in Representative Regions of China during Wintertime, *Atmosphere*, 10, 277,  
777 <https://doi.org/10.3390/atmos10050277>, 2019.
- 778 Wang, Y., Zhang, Q. Q., He, K., Zhang, Q., and Chai, L.: Sulfate-nitrate-ammonium aerosols over China: response  
779 to 2000–2015 emission changes of sulfur dioxide, nitrogen oxides, and ammonia, *Atmos. Chem. Phys.*, 13,  
780 2635–2652, <https://doi.org/10.5194/acp-13-2635-2013>, 2013.
- 781 Wang, Y., Yuan, Y., Wang, Q., Liu, C., Zhi, Q., and Cao, J.: Changes in air quality related to the control of coronavirus

- 782 in China: Implications for traffic and industrial emissions, *Sci. Total Environ.*, 731, 139133,  
783 <https://doi.org/10.1016/j.scitotenv.2020.139133>, 2020a.
- 784 Wang, Y., Yu, M., Wang, Y., Tang, G., Song, T., Zhou, P., Liu, Z., Hu, B., Ji, D., Wang, L., Zhu, X., Yan, C., Ehn, M.,  
785 Gao, W., Pan, Y., Xin, J., Sun, Y., Kerminen, V.-M., Kulmala, M., and Petäjä, T.: Rapid formation of intense  
786 haze episodes via aerosol–boundary layer feedback in Beijing, *Atmos. Chem. Phys.*, 20, 45–53,  
787 <https://doi.org/10.5194/acp-20-45-2020>, 2020b.
- 788 Wang, Y., Liu, C., Wang, Q., Qin, Q., Ren, H., and Cao, J.: Impacts of natural and socioeconomic factors on PM<sub>2.5</sub>  
789 from 2014 to 2017, *J. Environ. Manage.*, 284, 112071, <https://doi.org/10.1016/j.jenvman.2021.112071>, 2021c.
- 790 Wang, Z., Wang, R., Wang, J., Wang, Y., McPherson Donahue, N., Tang, R., Dong, Z., Li, X., Wang, L., Han, Y., and  
791 Cao, J.: The seasonal variation, characteristics and secondary generation of PM<sub>2.5</sub> in Xi’an, China, especially  
792 during pollution events, *Environ. Res.*, 212, 113388, <https://doi.org/10.1016/j.envres.2022.113388>, 2022b.
- 793 Wei, F., Yang G., Jiang, D., Liu, Z., Sun, B.: Basic statistics and characteristics of background values of soil elements  
794 in China. *Environ. Monit. in China (in Chinese)* 7, 1–6. <https://doi.org/10.19316/j.issn.1002-6002.1991.01.001>,  
795 1991.
- 796 Wood, E. C., Canagaratna, M. R., Herndon, S. C., Onasch, T. B., Kolb, C. E., Worsnop, D. R., Kroll, J. H., Knighton,  
797 W. B., Seila, R., Zavala, M., Molina, L. T., DeCarlo, P. F., Jimenez, J. L., Weinheimer, A. J., Knapp, D. J., Jobson,  
798 B. T., Stutz, J., Kuster, W. C., and Williams, E. J.: Investigation of the correlation between odd oxygen and  
799 secondary organic aerosol in Mexico City and Houston, *Atmos. Chem. Phys.*, 10, 8947–8968,  
800 <https://doi.org/10.5194/acp-10-8947-2010>, 2010.
- 801 Xu, H. M., Cao, J. J., Ho, K. F., Ding, H., Han, Y. M., Wang, G. H., Chow, J. C., Watson, J. G., Khol, S. D., Qiang,  
802 J., and Li, W. T.: Lead concentrations in fine particulate matter after the phasing out of leaded gasoline in Xi’an,  
803 China, *Atmos. Environ.*, 46, 217–224, <https://doi.org/10.1016/j.atmosenv.2011.09.078>, 2012.
- 804 Xu, J., Liu, D., Wu, X., Vu, T. V., Zhang, Y., Fu, P., Sun, Y., Xu, W., Zheng, B., Harrison, R. M., and Shi, Z.: Source  
805 apportionment of fine organic carbon at an urban site of Beijing using a chemical mass balance model, *Atmos.*  
806 *Chem. Phys.*, 21, 2021.
- 807 Xu, P., Yang, Y., Zhang, J., Gao, W., Liu, Z., Hu, B., and Wang, Y.: Characterization and source identification of  
808 submicron aerosol during serious haze pollution periods in Beijing, *J. of Environ. Sci.*, 112, 25–37,  
809 <https://doi.org/10.1016/j.jes.2021.04.005>, 2022.
- 810 Xu, W., Croteau, P., Williams, L., Canagaratna, M., Onasch, T., Cross, E., Zhang, X., Robinson, W., Worsnop, D.,  
811 and Jayne, J.: Laboratory characterization of an aerosol chemical speciation monitor with PM<sub>2.5</sub> measurement  
812 capability, *Aerosol Sci. Technol.*, 51, 69–83, <https://doi.org/10.1080/02786826.2016.1241859>, 2017.
- 813 Xue, J., Griffith, S. M., Yu, X., Lau, A. K. H., and Yu, J. Z.: Effect of nitrate and sulfate relative abundance in PM<sub>2.5</sub>  
814 on liquid water content explored through half-hourly observations of inorganic soluble aerosols at a polluted  
815 receptor site, *Atmos. Environ.*, 99, 24–31, <https://doi.org/10.1016/j.atmosenv.2014.09.049>, 2014.
- 816 Yan, Y., Sun, Y. B., Weiss, D., Liang, L. J., and Chen, H. Y.: Polluted dust derived from long-range transport as a  
817 major end member of urban aerosols and its implication of non-point pollution in northern China, *Sci. Total*

- 818 Environ., 506–507, 538–545, <https://doi.org/10.1016/j.scitotenv.2014.11.071>, 2015.
- 819 Yang, D., Li, Z., Yue, Z., Liu, J. X., Zhai, Z., Li, Z., Gao, M., Hu, A. L., Zhu, W. J., Ding, N., Li, Z., Guo, S., Wang,  
820 X., Wang, L., and Wei, J.: Variations in sources, composition, and exposure risks of PM<sub>2.5</sub> in both pre-heating  
821 and heating seasons, *Aerosol Air Qual. Res.*, 22, 14, <https://doi.org/10.4209/aaqr.210333>, 2022a.
- 822 Yang, S., Yuan, B., Peng, Y., Huang, S., Chen, W., Hu, W., Pei, C., Zhou, J., Parrish, D. D., Wang, W., He, X., Cheng,  
823 C., Li, X.-B., Yang, X., Song, Y., Wang, H., Qi, J., Wang, B., Wang, C., Wang, C., Wang, Z., Li, T., Zheng, E.,  
824 Wang, S., Wu, C., Cai, M., Ye, C., Song, W., Cheng, P., Chen, D., Wang, X., Zhang, Z., Wang, X., Zheng, J.,  
825 and Shao, M.: The formation and mitigation of nitrate pollution: comparison between urban and suburban  
826 environments, *Atmos. Chem. Phys.*, 22, 4539–4556, <https://doi.org/10.5194/acp-22-4539-2022>, 2022b.
- 827 Yang, X. and Teng, F.: The air quality co-benefit of coal control strategy in China, *Resour. Conserv. Recy.*, 129, 373–  
828 382, <https://doi.org/10.1016/j.resconrec.2016.08.011>, 2018.
- 829 Yang, X., Zheng, M., Liu, Y., Yan, C., Liu, J., Liu, J., and Cheng, Y.: Exploring sources and health risks of metals in  
830 Beijing PM<sub>2.5</sub>: Insights from long-term online measurements, *Sci. Total Environ.*, 814, 151954,  
831 <https://doi.org/10.1016/j.scitotenv.2021.151954>, 2022c.
- 832 Zeng, J. and He, Q.: Does industrial air pollution drive health care expenditures? Spatial evidence from China, *J.*  
833 *Clean. Prod.*, 218, 400–408, <https://doi.org/10.1016/j.jclepro.2019.01.288>, 2019.
- 834 Zhang, Q., Zheng, Y., Tong, D., Shao, M., Wang, S., Zhang, Y., Xu, X., Wang, J., He, H., Liu, W., Ding, Y., Lei, Y.,  
835 Li, J., Wang, Z., Zhang, X., Wang, Y., Cheng, J., Liu, Y., Shi, Q., Yan, L., Geng, G., Hong, C., Li, M., Liu, F.,  
836 Zheng, B., Cao, J., Ding, A., Gao, J., Fu, Q., Huo, J., Liu, B., Liu, Z., Yang, F., He, K., and Hao, J.: Drivers of  
837 improved PM<sub>2.5</sub> air quality in China from 2013 to 2017, *Proc. Natl. Acad. Sci. U.S.A.*, 116, 24463–24469,  
838 <https://doi.org/10.1073/pnas.1907956116>, 2019.
- 839 Zhang, Y., Vu, T. V., Sun, J., He, J., Shen, X., Lin, W., Zhang, X., Zhong, J., Gao, W., Wang, Y., Fu, T. M., Ma, Y., Li,  
840 W., and Shi, Z.: Significant changes in chemistry of fine particles in wintertime Beijing from 2007 to 2017:  
841 Impact of Clean Air Actions, *Environ. Sci. Technol.*, 54, 1344–1352, <https://doi.org/10.1021/acs.est.9b04678>,  
842 2020.
- 843 Zhang, Z., Gao, J., Zhang, L., Wang, H., Tao, J., Qiu, X., Chai, F., Li, Y., and Wang, S.: Observations of biomass  
844 burning tracers in PM<sub>2.5</sub> at two megacities in North China during 2014 APEC summit, *Atmos. Environ.*, 169,  
845 54–64, <https://doi.org/10.1016/j.atmosenv.2017.09.011>, 2017.
- 846 Zhao, P., Feng, Y., Zhu, T., and Wu, J.: Characterizations of resuspended dust in six cities of North China, *Atmos.*  
847 *Environ.*, 40, 5807–5814, <https://doi.org/10.1016/j.atmosenv.2006.05.026>, 2006.
- 848 Zhao, S., Tian, H., Luo, L., Liu, H., Wu, B., Liu, S., Bai, X., Liu, W., Liu, X., Wu, Y., Lin, S., Guo, Z., Lv, Y., and  
849 Xue, Y.: Temporal variation characteristics and source apportionment of metal elements in PM<sub>2.5</sub> in urban  
850 Beijing during 2018–2019, *Environ. Pollut.*, 268, 115856, <https://doi.org/10.1016/j.envpol.2020.115856>, 2021.
- 851 Zheng, G., Duan, F., Ma, Y., Zhang, Q., Huang, T., Kimoto, T., Cheng, Y., Su, H., and He, K.: Episode-Based  
852 Evolution Pattern Analysis of Haze Pollution: Method Development and Results from Beijing, China, *Environ.*  
853 *Sci. Technol.*, 50, 4632–4641, <https://doi.org/10.1021/acs.est.5b05593>, 2016.

- 854 Zhang, R., Jing, J., Tao, J., Hsu, S.-C., Wang, G., Cao, J., Lee, C. S. L., Zhu, L., Chen, Z., Zhao, Y., and Shen, Z.:  
855 Chemical characterization and source apportionment of PM<sub>2.5</sub> in Beijing: seasonal perspective, *Atmos. Chem.*  
856 *Phys.*, 13, 7053–7074, <https://doi.org/10.5194/acp-13-7053-2013>, 2013.
- 857 Zheng, M., Wang, Y., Yuan, L., Chen, N., and Kong, S.: Ambient observations indicating an increasing effectiveness  
858 of ammonia control in wintertime PM<sub>2.5</sub> reduction in Central China, *Sci. Total Environ.*, 824, 153708,  
859 <https://doi.org/10.1016/j.scitotenv.2022.153708>, 2022.
- 860 Zhou, W., Lei, L., Du, A., Zhang, Z., Li, Y., Yang, Y., Tang, G., Chen, C., Xu, W., Sun, J., Li, Z., Fu, P., Wang, Z.,  
861 and Sun, Y.: Unexpected increases of severe haze pollution during the post COVID - 19 Period: Effects of  
862 emissions, meteorology, and secondary production, *J. Geophys. Res-Atmos.*, 127,  
863 <https://doi.org/10.1029/2021JD035710>, 2022.
- 864 Ziemann, P. J. and Atkinson, R.: Kinetics, products, and mechanisms of secondary organic aerosol formation, *Chem.*  
865 *Soc. Rev.*, 41, 6582, <https://doi.org/10.1039/c2cs35122f>, 2012.

866

---

867

868

869

870 **Table 1.** Meteorological conditions, gas pollutants, chemical composition, and source contribution of PM<sub>2.5</sub> during  
 871 pollution episodes in Xi'an, Shijiazhuang, and Beijing

| Parameters                                | Xi'an                              |                                    | Shijiazhuang                       |                                    |                                    | Beijing                            |                                    |                                    |
|-------------------------------------------|------------------------------------|------------------------------------|------------------------------------|------------------------------------|------------------------------------|------------------------------------|------------------------------------|------------------------------------|
|                                           | EP1                                | EP2                                | EP3                                | EP4                                | EP5                                | EP6                                | EP7                                | EP8                                |
| T (°C)                                    | 4.9 ± 2.6                          | 1.5 ± 3.5                          | 0.4 ± 3.4                          | -0.2 ± 3.3                         | -2.7 ± 3.3                         | 0.3 ± 3.2                          | -1.6 ± 3.3                         | 5.1 ± 3.6                          |
| RH (%)                                    | 52 ± 10                            | 45 ± 10                            | 61 ± 15                            | 40 ± 13                            | 75 ± 11                            | 57 ± 19                            | 45 ± 24                            | 36 ± 10                            |
| WS (m s <sup>-1</sup> )                   | 0.5 ± 0.2                          | 0.7 ± 0.3                          | 1.4 ± 0.6                          | 1.9 ± 0.8                          | 1.4 ± 0.7                          | 1.0 ± 0.6                          | 1.1 ± 0.6                          | 1.0 ± 0.6                          |
| Dominant WD <sup>a</sup>                  | WSW,<br>WNW                        | WSW                                | NNW                                | NNW                                | NNW                                | NNE                                | NNW,<br>NNE                        | NNE,<br>ENE                        |
| CO (mg m <sup>-3</sup> )                  | 1.39 ± 0.40                        | 1.15 ± 0.56                        | 1.47 ± 0.62                        | 0.60 ± 0.30                        | 0.43 ± 0.33                        | 1.04 ± 0.56                        | 0.81 ± 0.32                        | 1.00 ± 0.55                        |
| SO <sub>2</sub> (µg m <sup>-3</sup> )     | 15 ± 3                             | 15 ± 5                             | 9 ± 4                              | 8 ± 4                              | 3 ± 1                              | 6 ± 5                              | 4 ± 3                              | 6 ± 4                              |
| NO <sub>2</sub> (µg m <sup>-3</sup> )     | 74 ± 22                            | 63 ± 32                            | 63 ± 14                            | 47 ± 21                            | 27 ± 11                            | 54 ± 22                            | 46 ± 17                            | 42 ± 21                            |
| O <sub>x</sub> (ppm)                      | 47 ± 8                             | 42 ± 10                            | 36 ± 7                             | 32 ± 6                             | 27 ± 3                             | 36 ± 6                             | 33 ± 4                             | 43 ± 9                             |
| ALWC (µg m <sup>-3</sup> )                | 15 ± 11                            | 8 ± 8                              | 42 ± 37                            | 12 ± 11                            | 59 ± 448                           | 28 ± 47                            | 23 ± 8                             | 11 ± 13                            |
| Dominant                                  | OA (38%)                           | OA (34%)                           | NO <sub>3</sub> <sup>-</sup> (27%) | OA (30%)                           | NO <sub>3</sub> <sup>-</sup> (32%) | OA (32%)                           | OA (32%)                           | OA (40%)                           |
| Chemical composition                      | NO <sub>3</sub> <sup>-</sup> (24%) | NO <sub>3</sub> <sup>-</sup> (24%) | OA (26%)                           | NO <sub>3</sub> <sup>-</sup> (23%) | OA (26%)                           | NO <sub>3</sub> <sup>-</sup> (26%) | NO <sub>3</sub> <sup>-</sup> (26%) | NO <sub>3</sub> <sup>-</sup> (23%) |
| Dominant source contribution <sup>b</sup> | BB (30%)                           | SF (34%)                           | SF (39%)                           | BB (40%)                           | SF (70%)                           | SF (62%)                           | SF (61%)                           | BB (38%)                           |
|                                           | SF (25%)                           | BB (24%)                           | BB (23%)                           | CC (16%)                           | BB (16%)                           | BB (13%)                           | BB (14%)                           | SF (27%)                           |
|                                           | CC (17%)                           | VE (16%)                           | CC (16%)                           | VE (16%)                           |                                    |                                    |                                    | VE (15%)                           |

872 <sup>a</sup> WSW : west-southwest; WNW : west-northwest; NNW : north-northwest; NNE : north-northeast; ENE : East-northeast

873 <sup>b</sup> BB: biomass burning; ~~SNp~~ SSF: secondary nitrate plus sulfates secondary formation source; CC: coal combustion; VE:  
 874 vehicle emission

875

876 **Figure captions:**

877 **Figure 1.** Chemical composition and source apportionment results of PM<sub>2.5</sub> in three pilot cities of northern China  
878 during the sampling period.

879 **Figure 2.** Mass fractions of chemical components (a-c) and sources contribution (d-f) with reconstructed PM<sub>2.5</sub>  
880 concentration in Xi'an, Shijiazhuang, and Beijing.

881 **Figure 3.** Correlations of ~~secondary nitrate plus sulfate~~secondary formation source/ΔCO and O<sub>x</sub> mixing ratio in (a)  
882 Xi'an, (b) Shijiazhuang, and (c) Beijing. Each point and its error bar represent the mean and standard deviation in  
883 each bin (ΔO<sub>x</sub> = 5 ppb).

884 **Figure 4.** Correlation of ~~secondary nitrate plus sulfate~~secondary formation source/ΔCO and ALWC during ~~winter~~  
885 sampling periods in (a) Xi'an, (b) Shijiazhuang, and (c) Beijing, respectively. The points and error bar represent the  
886 mean values and standard deviation values of ~~secondary nitrate plus sulfate~~secondary formation source/ΔCO and  
887 ALWC<sub>O\*</sub> in each bin. In Xi'an, each bin is 5 μg m<sup>-3</sup> (ΔALWC = 5 μg m<sup>-3</sup>). In Shijiazhuang, each bin is 5 μg m<sup>-3</sup>  
888 (ΔALWC = 5 μg m<sup>-3</sup>) when ALWC ranged from 0 to 75 μg m<sup>-3</sup>, but 25 μg m<sup>-3</sup> (ΔALWC = 25 μg m<sup>-3</sup>) for ALWC  
889 ranged from 75 to 200 μg m<sup>-3</sup> due to limitations in data. In Beijing, each bin is 5 μg m<sup>-3</sup> (ΔALWC = 5 μg m<sup>-3</sup>) when  
890 ALWC ranged from 0 to 50 μg m<sup>-3</sup>, but 100 μg m<sup>-3</sup> (ΔALWC = 100 μg m<sup>-3</sup>) for ALWC ranged from 50 to 900 μg m<sup>-3</sup>  
891 <sup>3</sup> due to limitations in data.

892 **Figure 5.** Summary of PM<sub>2.5</sub> and its composition (a, b, c) and source contribution (d, e, f) in Xi'an, Shijiazhuang,  
893 and Beijing in winter in past decades. Where \* represents the result of this study. The data and references used for  
894 this figure are listed in Table S5 and S7.

895



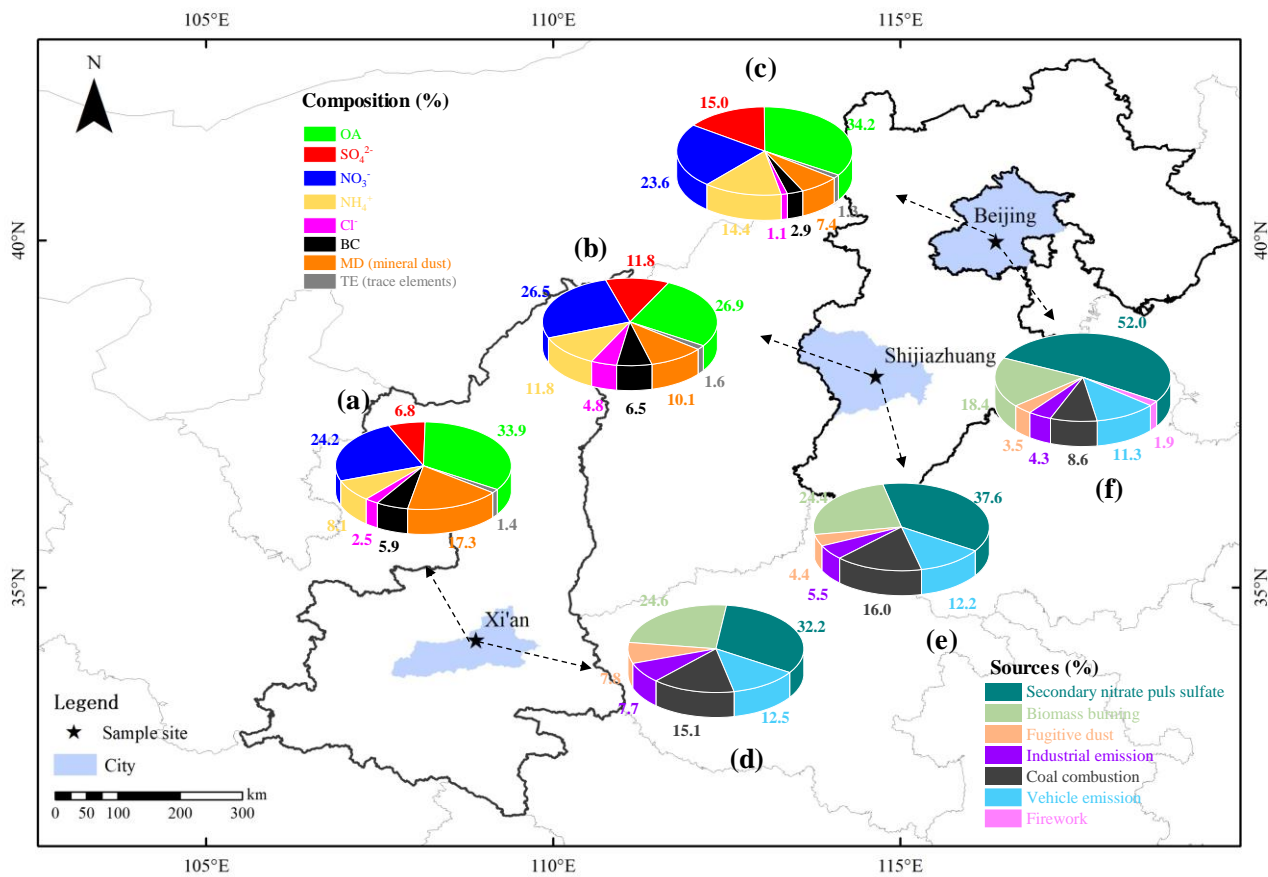

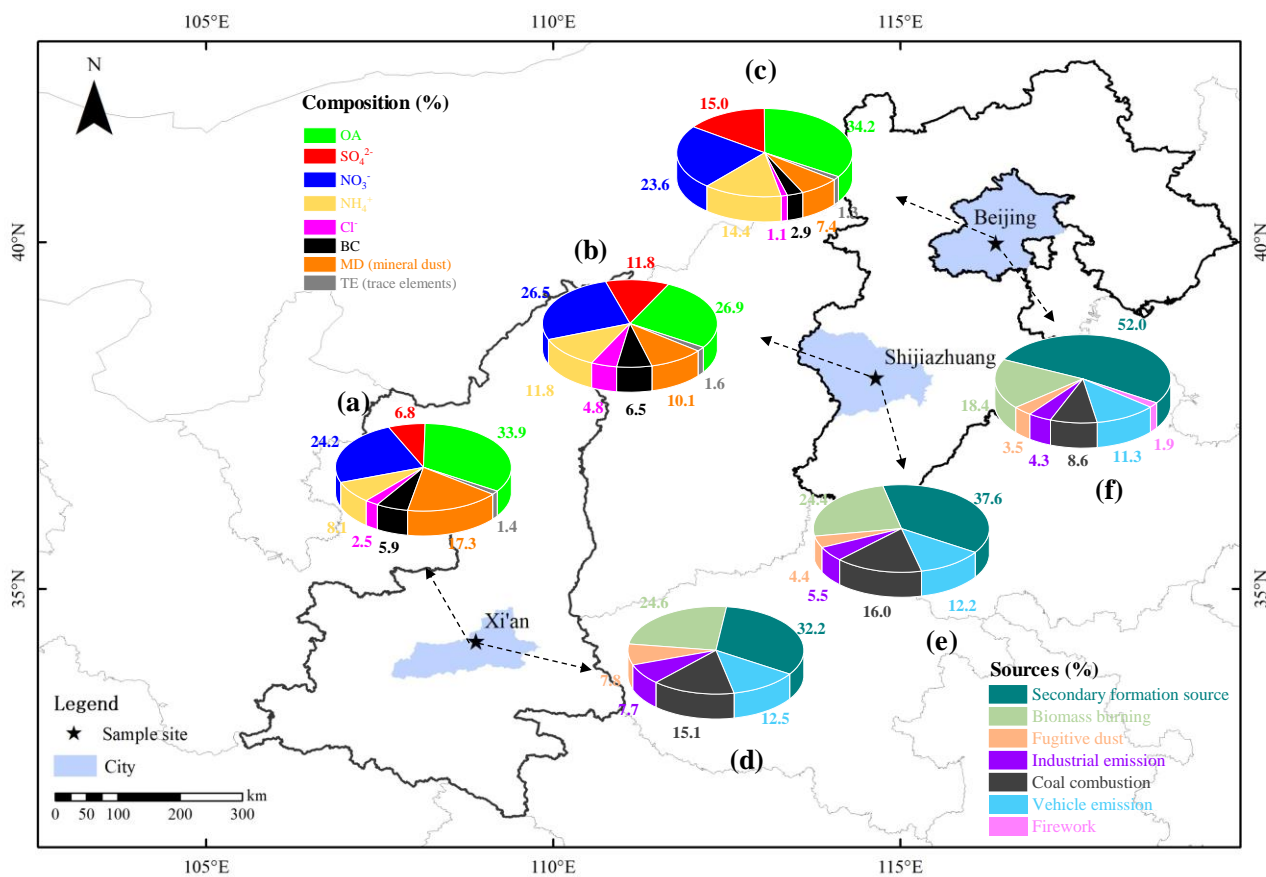

897

898 **Figure 1.** Chemical composition and source apportionment results of PM<sub>2.5</sub> in three pilot cities of northern China  
 899 during the sampling period.

900

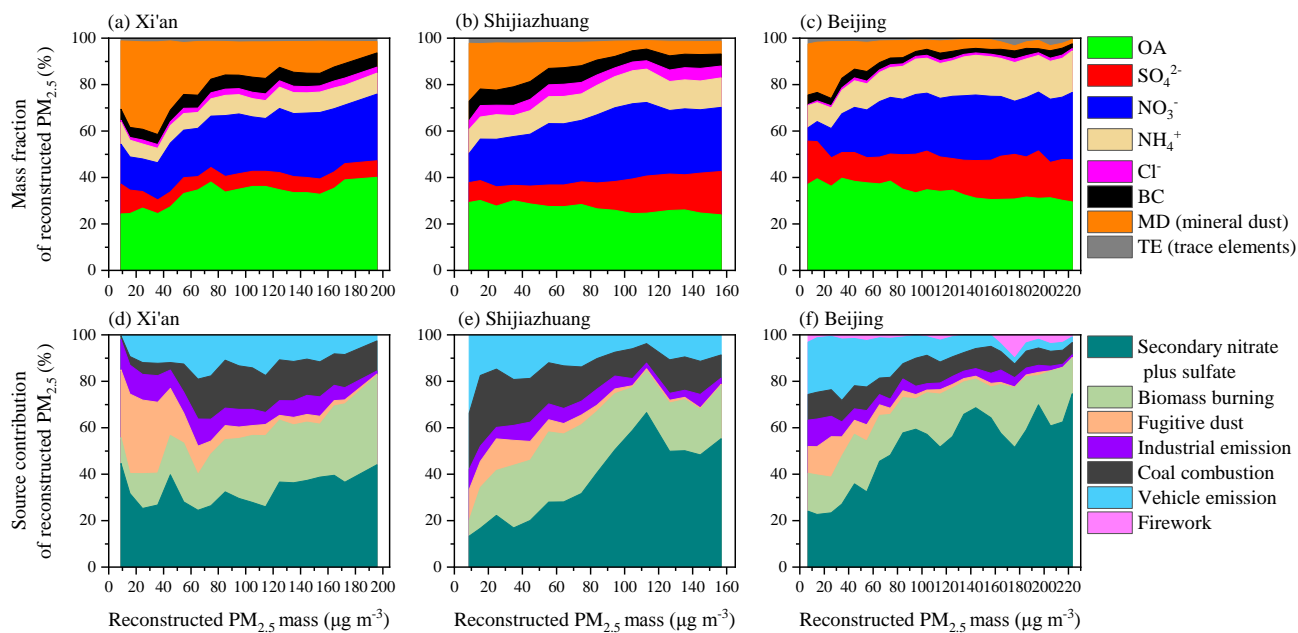

901

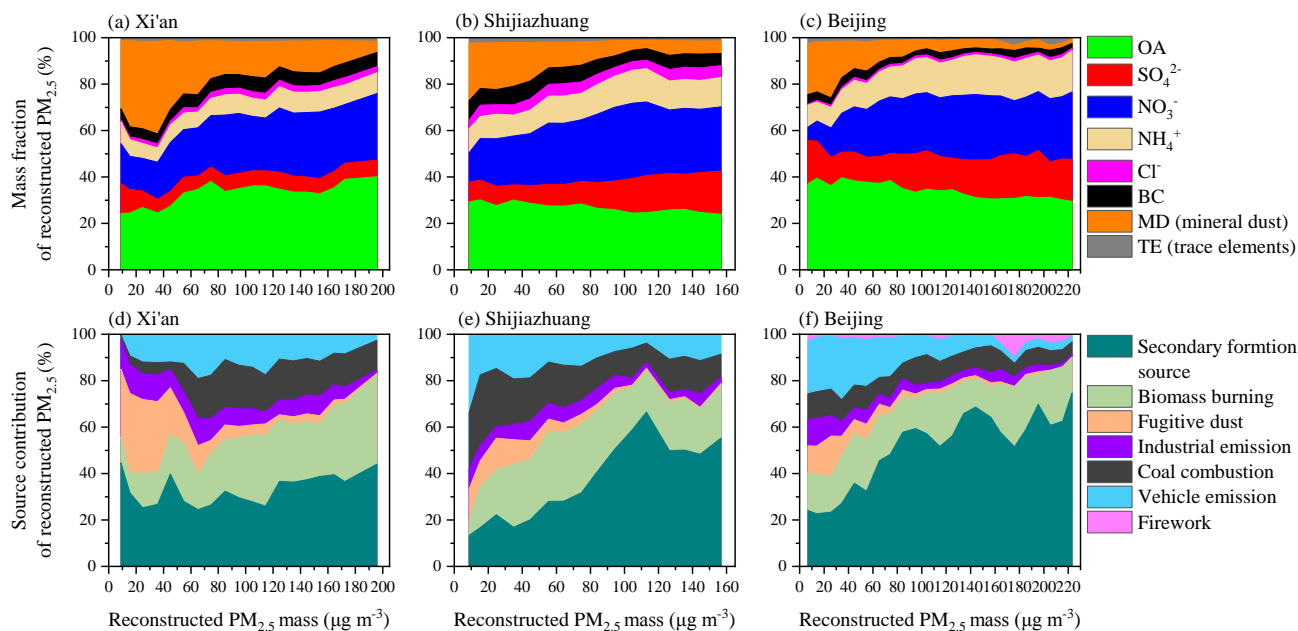

902

903 **Figure 2.** Mass fractions of chemical components (a-c) and sources contribution (d-f) with reconstructed  $PM_{2.5}$   
 904 concentration in Xi'an, Shijiazhuang, and Beijing.

905

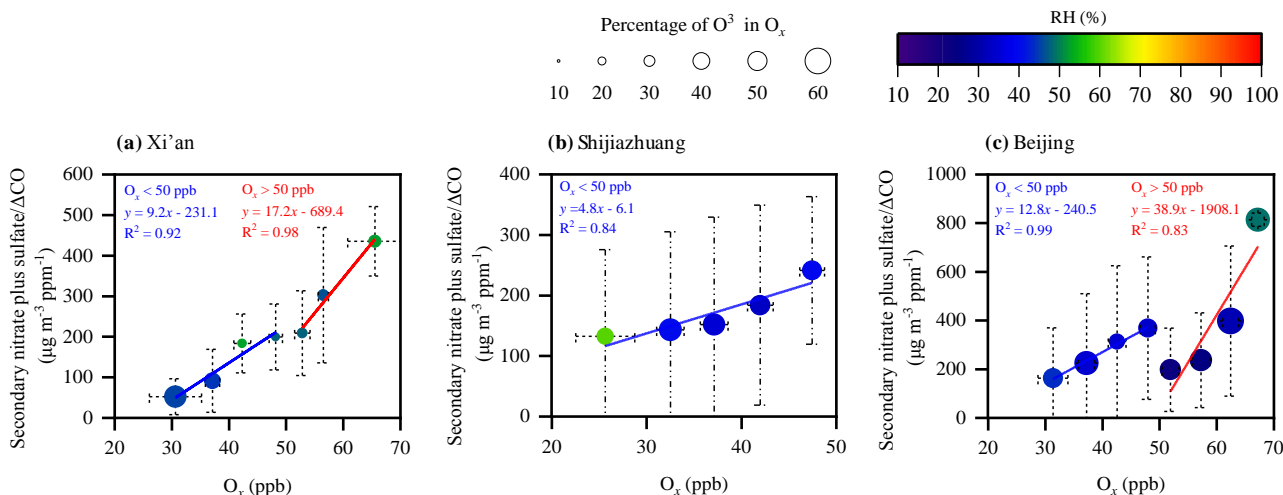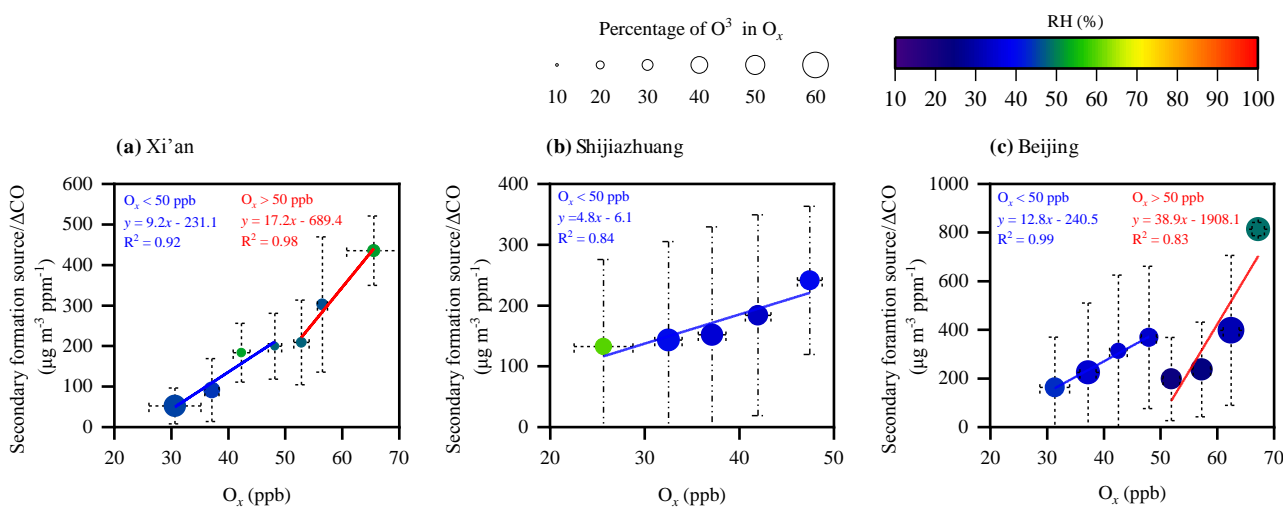

**Figure 3.** Correlations of secondary nitrate plus sulfatesecondary formation source/ΔCO and O<sub>x</sub> mixing ratio in (a) Xi'an, (b) Shijiazhuang, and (c) Beijing. Each point and its error bar represent the mean and standard deviation in each bin (ΔO<sub>x</sub> = 5 ppb).

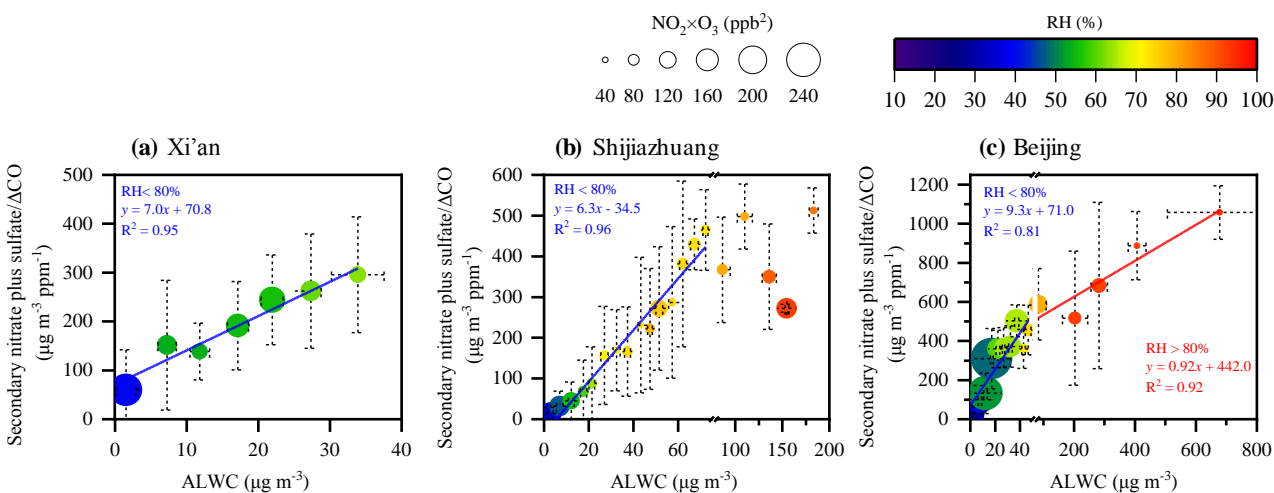

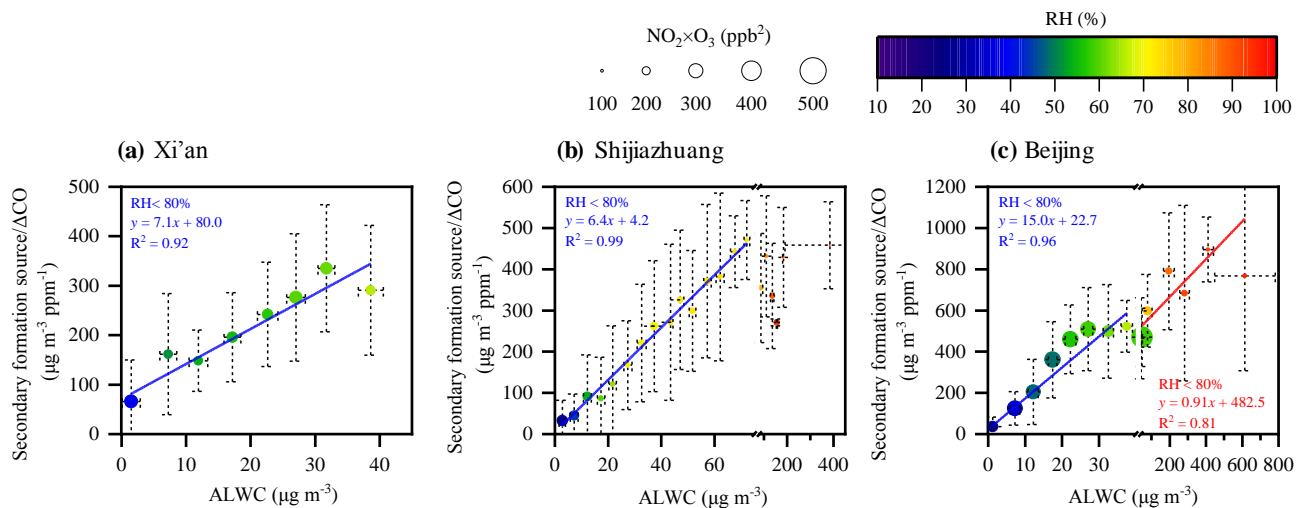

913

914 **Figure 4.** Correlation of secondary nitrate plus sulfate secondary formation source/ΔCO and ALWC during winter  
 915 sampling periods in (a) Xi'an, (b) Shijiazhuang, and (c) Beijing, respectively. The points and error bar represent the  
 916 mean values and standard deviation values of secondary nitrate plus sulfate secondary formation source/ΔCO and  
 917 ALWC in each bin. In Xi'an, each bin is  $5 \mu\text{g m}^{-3}$  ( $\Delta\text{ALWC} = 5 \mu\text{g m}^{-3}$ ). In Shijiazhuang, each bin is  $5 \mu\text{g m}^{-3}$   
 918 ( $\Delta\text{ALWC} = 5 \mu\text{g m}^{-3}$ ) when ALWC ranged from 0 to  $75 \mu\text{g m}^{-3}$ , but  $25 \mu\text{g m}^{-3}$  ( $\Delta\text{ALWC} = 25 \mu\text{g m}^{-3}$ ) for ALWC  
 919 ranged from  $75$  to  $200 \mu\text{g m}^{-3}$  due to limitations in data. In Beijing, each bin is  $5 \mu\text{g m}^{-3}$  ( $\Delta\text{ALWC} = 5 \mu\text{g m}^{-3}$ )  
 920 ALWC ranged from 0 to  $50 \mu\text{g m}^{-3}$ , but  $100 \mu\text{g m}^{-3}$  ( $\Delta\text{ALWC} = 100 \mu\text{g m}^{-3}$ ) for ALWC ranged from  $50$  to  $900 \mu\text{g m}^{-3}$   
 921  $^3$  due to limitations in data.

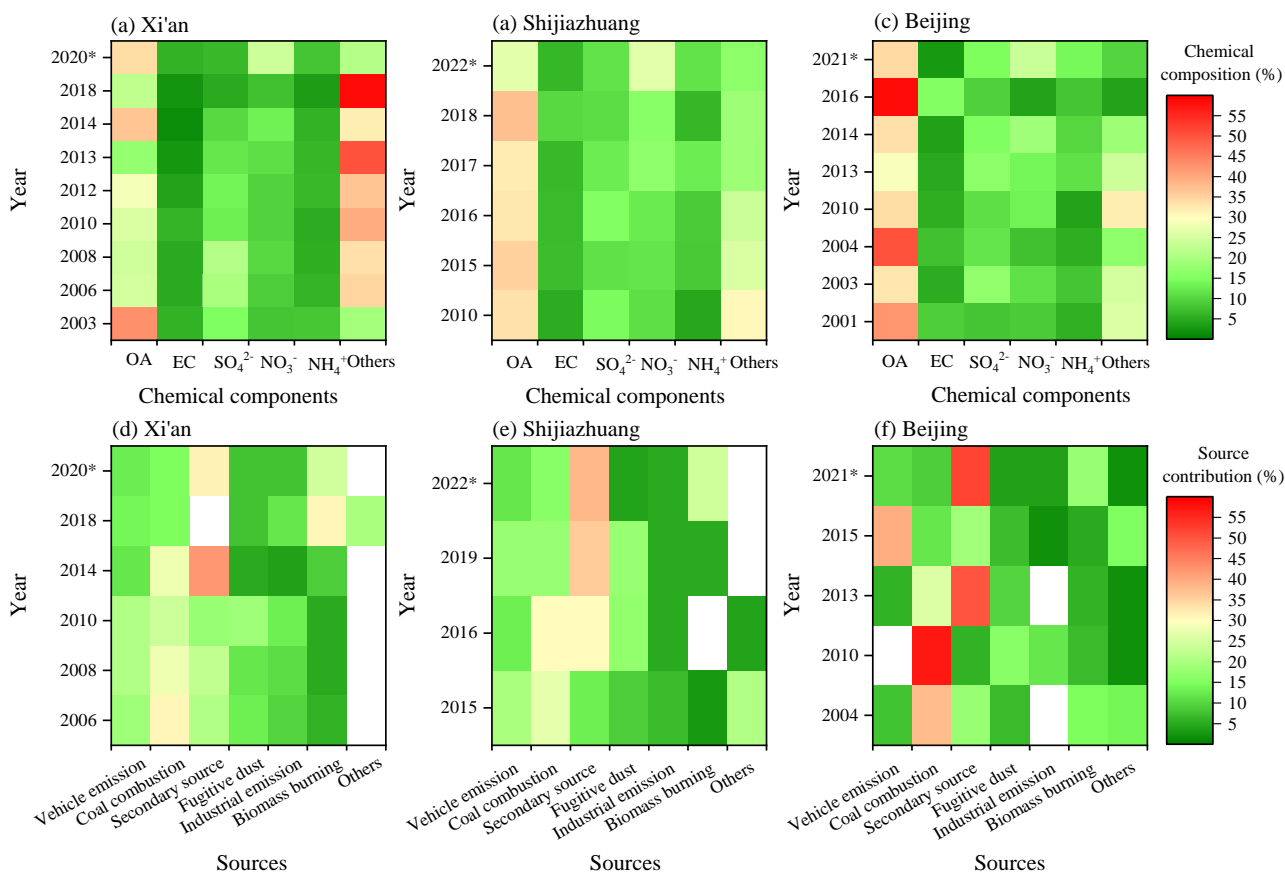

922

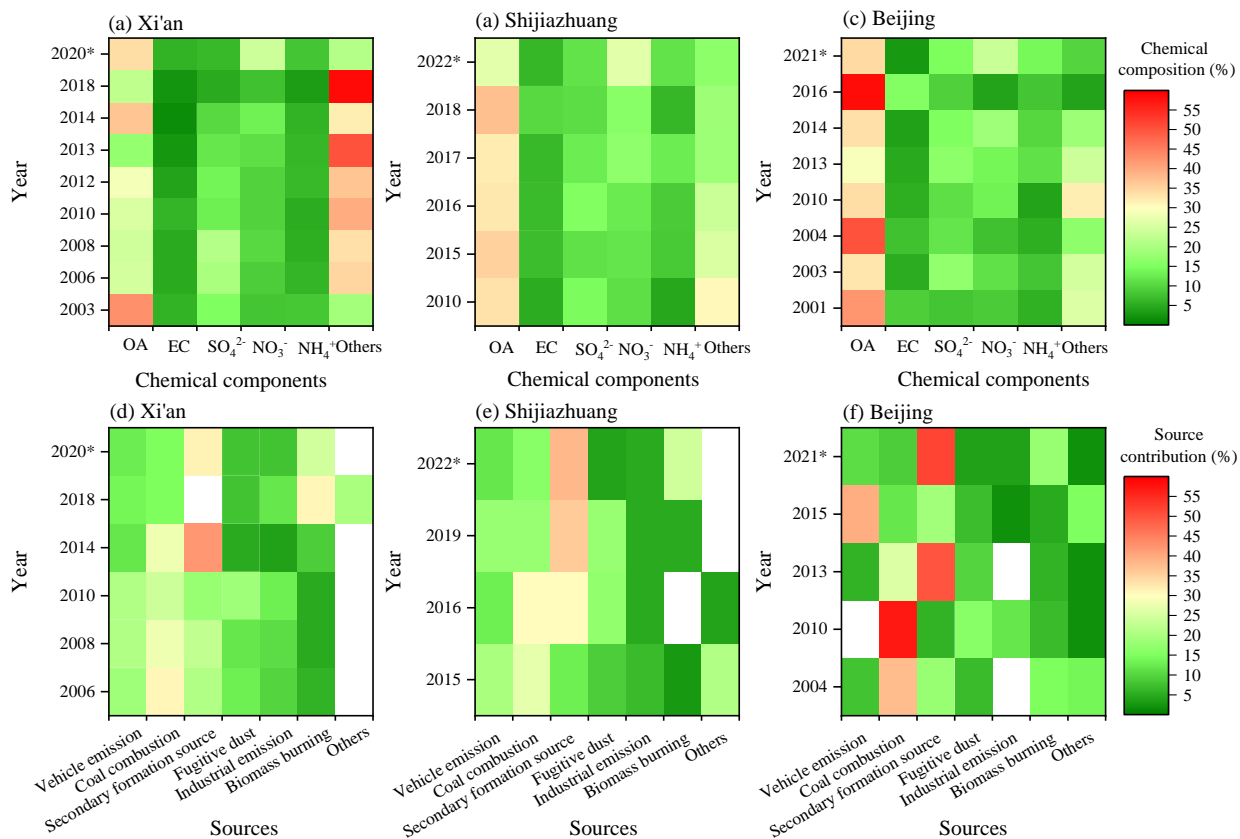

923

924 **Figure 5.** Summary of PM<sub>2.5</sub> and its composition (a, b, c) and source contribution (d, e, f) in Xi'an, Shijiazhuang,  
 925 and Beijing in winter in past decades. Where \* represents the result of this study, and the empty white area means no  
 926 data. The data and references used for this figure are listed in Table [S6-S7](#) and [S7-S8](#).

927

1 ***Supplement of***

2 **High-time-resolution chemical composition and source apportionment of PM<sub>2.5</sub> in northern Chinese cities:**  
3 **implications for policy**

4 Yong Zhang<sup>1,2,3</sup>, Jie Tian<sup>1,2,4</sup>, Qiyuan Wang<sup>1,2,3,4\*</sup>, Lu Qi<sup>5</sup>, Manousos Ioannis Manousakas<sup>5</sup>, Yuemei Han<sup>1,4</sup>, Weikang  
5 Ran<sup>1,2</sup>, Yele Sun<sup>6</sup>, Huikun Liu<sup>1,2,4</sup>, Renjian Zhang<sup>6</sup>, Yunfei Wu<sup>6</sup>, Tianqu Cui<sup>5</sup>, Kaspar Rudolf Daellenbach<sup>5</sup>, Jay Gates  
6 Slowik<sup>5</sup>, André S. H. Prévôt<sup>5</sup>, Junji Cao<sup>6\*</sup>

7 <sup>1</sup> State Key Laboratory of Loess and Quaternary Geology, Institute of Earth Environment, Chinese Academy  
8 of Sciences, Xi'an 710061, China

9 <sup>2</sup> National Observation and Research Station of Regional Ecological Environment Change and  
10 Comprehensive Management in the Guanzhong Plain, Shaanxi, Xi'an 710061, China

11 <sup>3</sup> University of Chinese Academy of Sciences, Beijing 100049, China

12 <sup>4</sup> Center for Excellence in Quaternary Science and Global Change, Xi'an 710061, China

13 <sup>5</sup> Laboratory of Atmospheric Chemistry, Paul Scherrer Institute (PSI), Villigen 5232, Switzerland

14 <sup>6</sup> Institute of Atmospheric Physics, Chinese Academy of Sciences, Beijing 100029, China

15 *Correspondence:* wangqy@ieecas.cn (Qiyuan Wang), jjcao@mail.iap.ac.cn (Junji Cao).

16 **Text S1. Selction of inputted HERM chemical species and its uncertainty calculation**

17 Considering the validity and credibility of monitoring data, chemical species including OA, NO<sub>3</sub><sup>-</sup>, SO<sub>4</sub><sup>2-</sup>, NH<sub>4</sub><sup>+</sup>,  
18 Cl<sup>-</sup>, and BC were all selected to input HERM model for three pilot cities. For inorganic elements, Si, K, Ca, Cr, Mn,  
19 Fe, Ni, Cu, Zn, As, Se, Ba, and Pb in Xi'an and Beijing, and Si, K, Ca, Ti, Cr, Mn, Fe, Ni, Cu, Zn, As, Se, Ba, and  
20 Pb in Shijiazhuang were selected for source apportionment, respectively.

21 The uncertainty data of chemical species inputting HERM was calculated according to the recommendation in  
22 the PMF5.0 user guideline. If the measured chemical species concentration is greater than the minimum detection  
23 limit (MDL) provided, the uncertainty (Unc) calculation is based following equation:

$$24 \text{Unc}_i = \sqrt{(C_i \times E_i)^2 + (0.5 \times \text{MDL}_i)^2} \quad (1)$$

25 where  $C_i$  represents measured concertation for species  $i$ ,  $E_i$  represents error fraction of species  $i$ . For online  
26 measured data, the error fraction was recommended to use 10% (Rai et al., 2020). If the measured concentration is  
27 less than or equal to the MDL provided, the Unc is calculated as the following equation:

$$28 \text{Unc} = \frac{5}{6} \times \text{MDL} \quad (2)$$

29

30 **Text S2 Diagnostics of HERM solutions**

31 In this study, factors numbering from two to ten were selected and run in the HERM software. Each factor  
32 solution was run thirty times with completely unconstrained profiles to explore the possible sources. The optimal  
33 factor number solution was determined by examining the ratio of Q and expected Q (Q<sub>exp</sub>). The Q<sub>exp</sub> in HERM was  
34 equal to (samples × species – factors × (samples + species) + the number of constrained source profiles). As shown  
35 in Fig. S5, the value of Q/Q<sub>exp</sub> decreased with the increase of the factor number, which suggests increasing the factor  
36 number could lead to a better explanation of the variance by HERM. However, the utility of increasing factors  
37 declined with the number of factors. Too many factors could cause splitting profiles, although the Q/Q<sub>exp</sub> may be  
38 desirable (Liu et al., 2021; Salameh et al., 2018, 2016). Thus, the drops of Q/Q<sub>exp</sub> ( $\Delta Q/Q_{\text{exp}}$ ) were subsequently  
39 evaluated to choose the optimal solution factor number. As shown in Table S2, when the number of factors increases  
40 to more than six in Xi'an, the value of  $\Delta Q/Q_{\text{exp}}$  shows a relatively stable change trend. A six-factor solution is  
41 preferable because  $\Delta Q/Q_{\text{exp}}$  between the five-solution and six-solution is smaller than that between the six-solution  
42 and seven-solution (Liu et al., 2021). In addition, secondary nitrate plus sulfate formation source and biomass burning  
43 were mixed when the factor number was five, and vehicle emission was split into two profiles when the factor number



44 was seven (Table S3). Therefore, the six-factor solution was determined as the optimal HERM solution for Xi'an.  
45 Similar criterias were used for Shijiazhuang and Beijing, six-factor and eight-factor solutions were determined as  
46 optimal HERM solutions, respectively.

47

### 48 **Text S3 Estimation of secondary organic aerosol (SOA).**

49 Due to lack of critical tracers of SOA, the sources of SOA cannot be individually resolved by receptor model.  
50 In this study, the secondary sources were mainly characterized by high EV values for inorganic  
51 aerosols such as  $\text{SO}_4^{2-}$ ,  $\text{NO}_3^-$ ,  $\text{NH}_4^+$ , but the medium EV values for OA (16~29%) were also presented on  
52 secondary sources in three pilot cities. This means that the SOA maybe mixed in with the factors of secondary  
53 sources. To verify this, the SOA concentrations we estimated by using a BC-tracer method (Wang et al., 2019)  
54 and then compared the results with those based on source apportionment. The SOA calculation by BC-tracer  
55 method was calculated as follow:

$$56 \quad [\text{SOA}]_{\text{BC-tracer}} = [\text{OA}] - (\text{OA}/\text{BC})_{\text{pri}} \times [\text{BC}] \quad (\text{S-1})$$

57 where [ ] means mass concentration,  $(\text{OA}/\text{BC})_{\text{pri}}$  is the ratio of [OA] to [BC] in primary emission. The  
58  $(\text{OA}/\text{BC})_{\text{pri}}$  ratios vary among sources, therefore, a minimum R squared (MRS) method was used to derive  
59 appropriate  $(\text{OA}/\text{BC})_{\text{pri}}$  values for three pilot cities. In previous studies (Srivastava et al., 2018; Wang et al.,  
60 2019), MRS method has been used to calculated the concertation of secondary organic carbon and brown carbon.  
61 More detailed information on the method and a validation of this approach can be found in Wang et al. (2019).

62 In addition, according to results of receptor model, SOA concentration can also be estimated as follow  
63 based on EV values of OA from secondary source factors.

$$64 \quad [\text{SOA}]_{\text{source apportionment}} = [\text{OA}] \times \text{EV}_{\text{OA}} \quad (\text{S-2})$$

65 where  $\text{EV}_{\text{OA}}$  represents the EV values of OA in secondary sources factors resolved by HERM model.

66 As shown in Fig. S9, the  $(\text{OA}/\text{BC})_{\text{pri}}$  ratios were determined as 4.73 for Xi'an, 3.12 for Shijiazhuang and  
67 7.6 for Beijing, respectively. Furthermore, the concentrations of SOA from three pilot cities were shown in  
68 Table R1 based two different methods. As we can see, the SOA concentrations estimated by EV values of OA  
69 are close to that by BC-tracer method for three pilot cities. This indicated SOA was mixed in secondary sources  
70 factors.

71

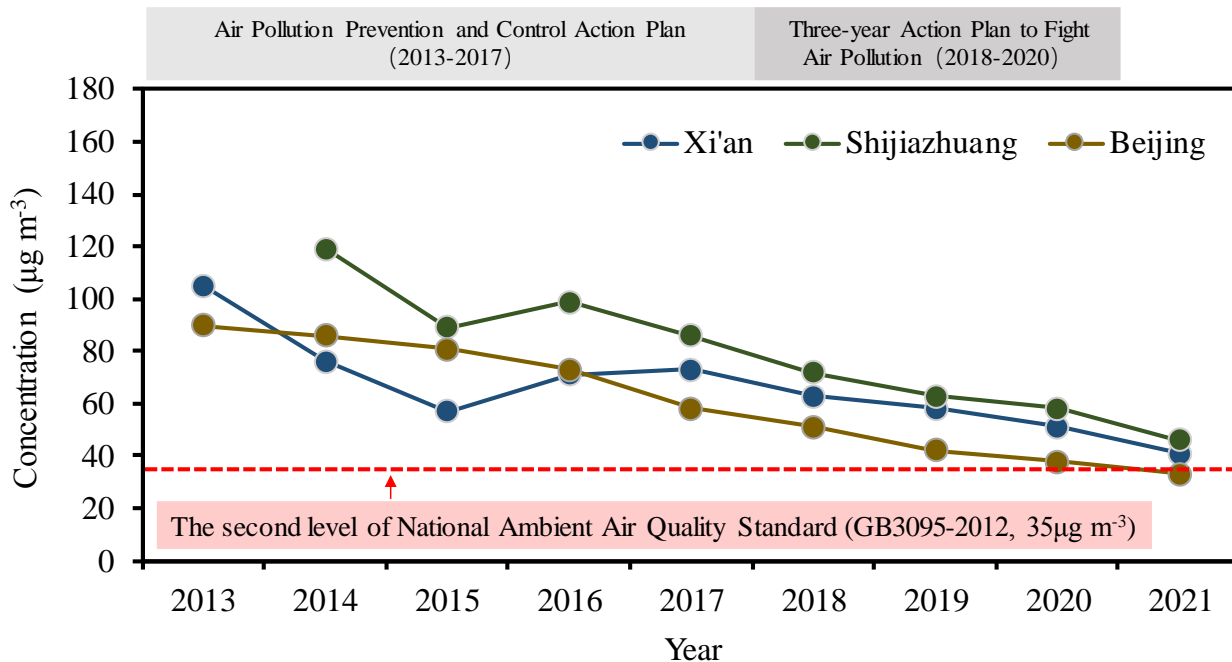

72  
73  
74  
75  
76  
77

**Figure S1.** Annual average concentration of PM<sub>2.5</sub> from 2013 to 2021 in Xi'an, Shijiazhuang, and Beijing. (The data are from the website of the local Ecological Environment Bureau, Xi'an: <http://xaepb.xa.gov.cn/>, Shijiazhuang: <https://sthjj.sjz.gov.cn/>, Beijing: <http://sthjj.beijing.gov.cn/>). The red dotted line represents the second level of the National Ambient Air Quality Standard (GB3095-2012, 35 µg m<sup>-3</sup>)

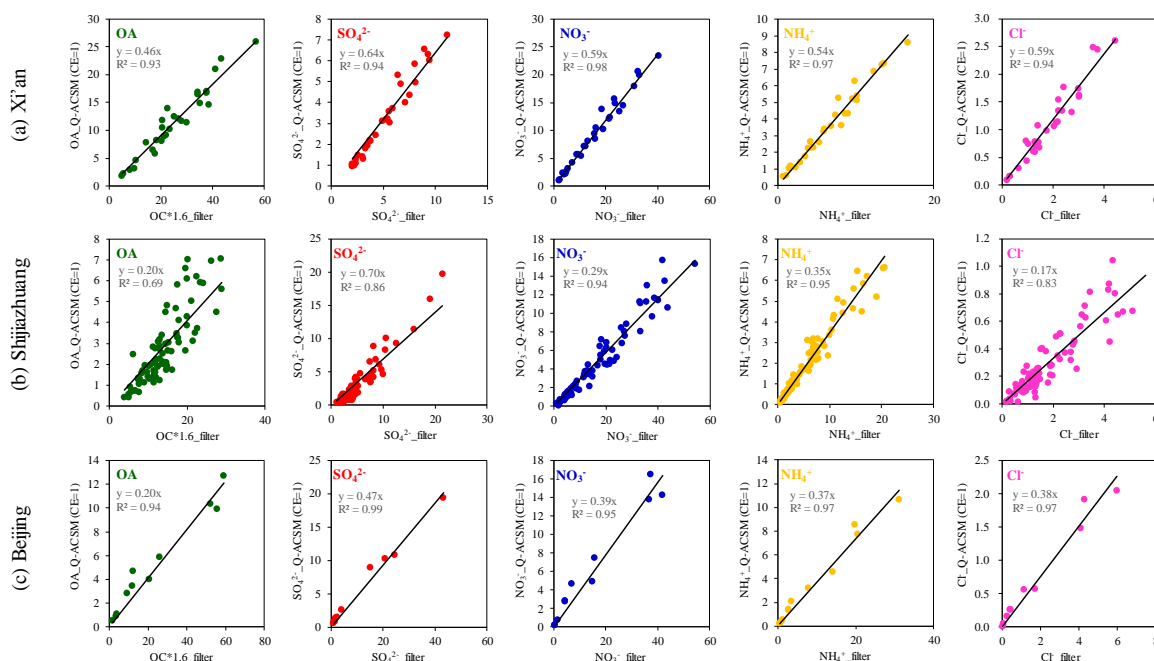

78  
79  
80  
81

**Figure S2.** Correction of chemical components measured by Q-ACSM in different cities. During the campaigns, offline filter samples were simultaneously sampled for the correction. In summary, 29 offline samples in Xi'an, 83 offline samples in Shijiazhuang, and 10 offline samples in Beijing were sampled respectively.

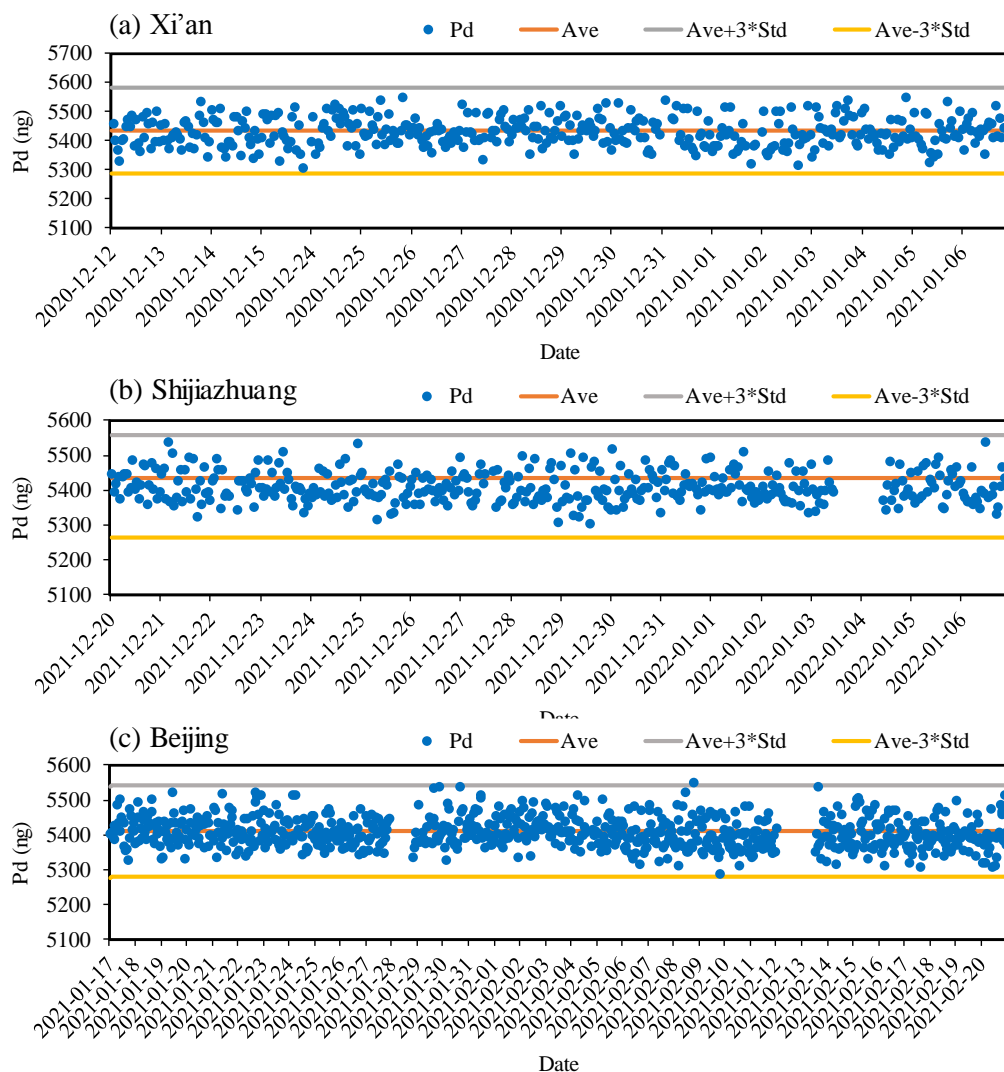

82

83 **Figure S3.** Concentration of the internal standard element (Pd) of Xact625 during sampling periods in (a) Xi'an,  
 84 (b) Shijiazhuang, and (c) Beijing.

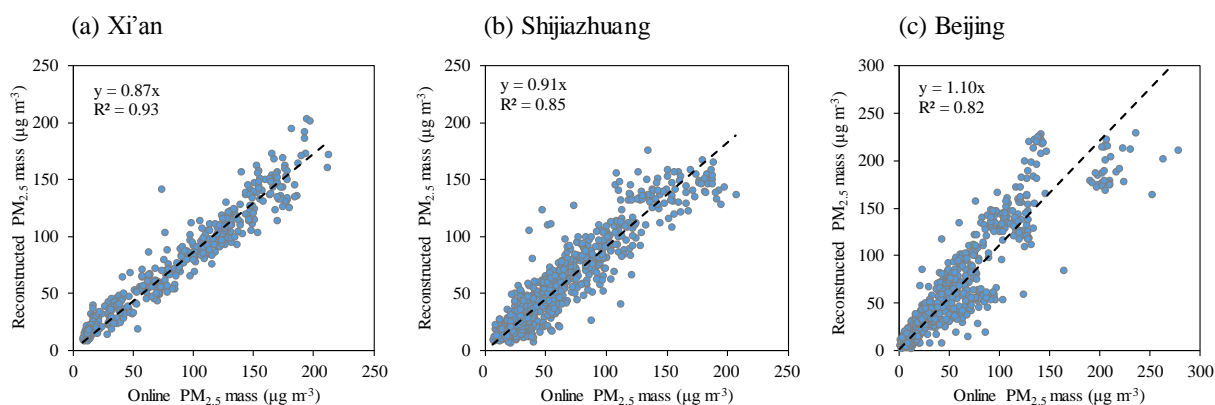

85

86 **Figure S4.** Correlation of online and reconstructed PM<sub>2.5</sub> concentration in (a) Xi'an, (b) Shijiazhuang, and (c) Beijing  
 87 during the campaigns. The online PM<sub>2.5</sub> mass data in the X axis from national monitor stations near sampling sites.

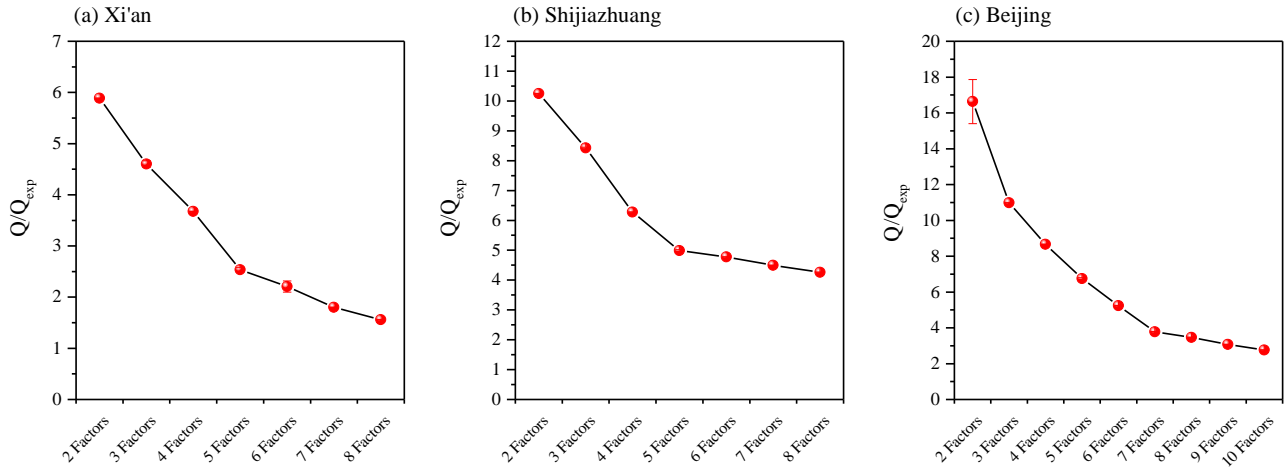

88

89 **Figure S5.** Values of  $Q/Q_{\text{exp}}$  for the unconstrained profile solutions with two to ten factors based on thirty runs in (a)  
 90 Xi'an, (b) Shijiazhuang, and (c) Beijing, respectively.

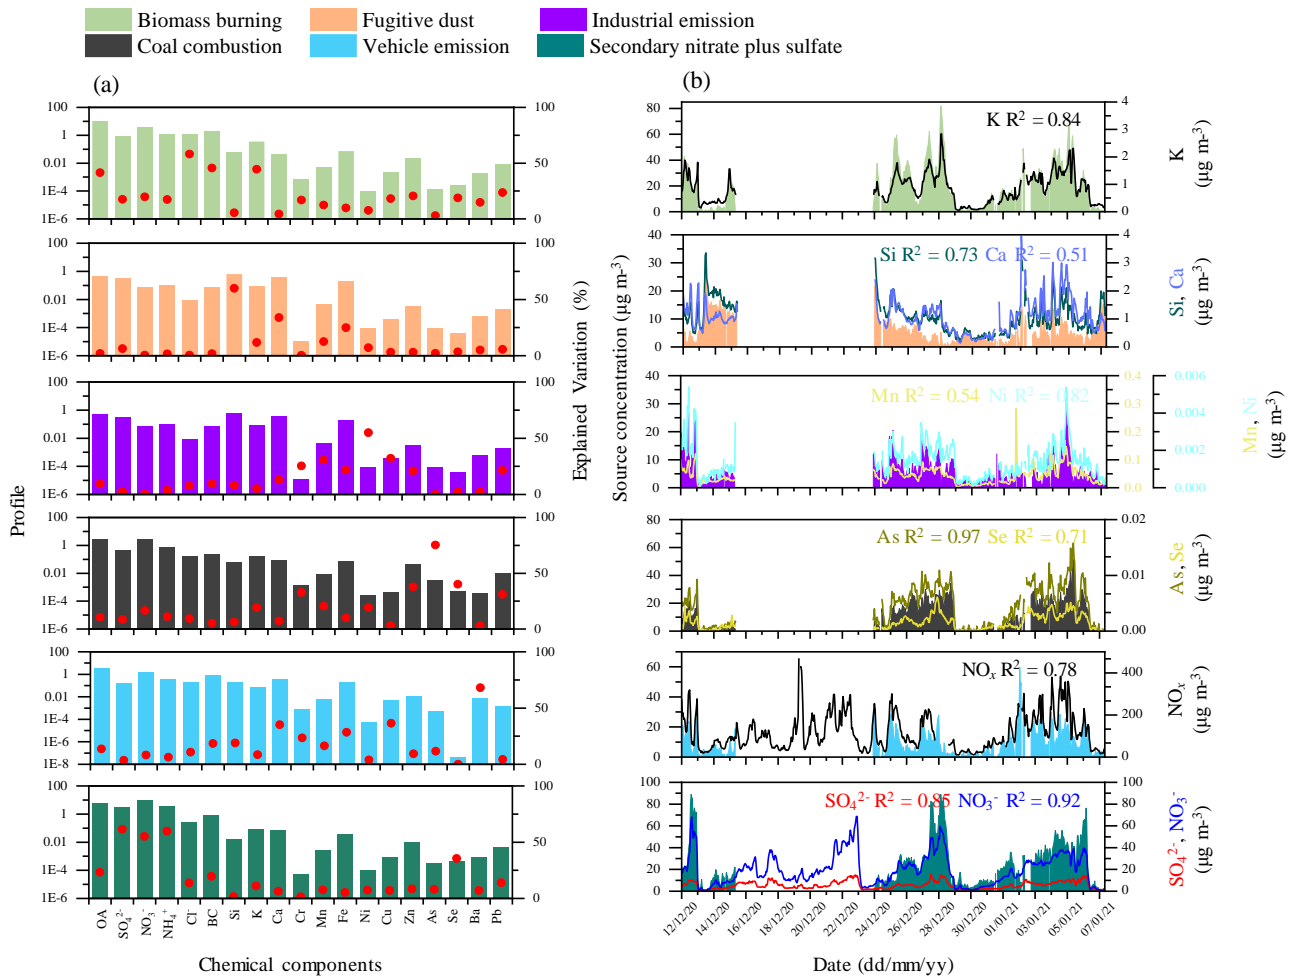

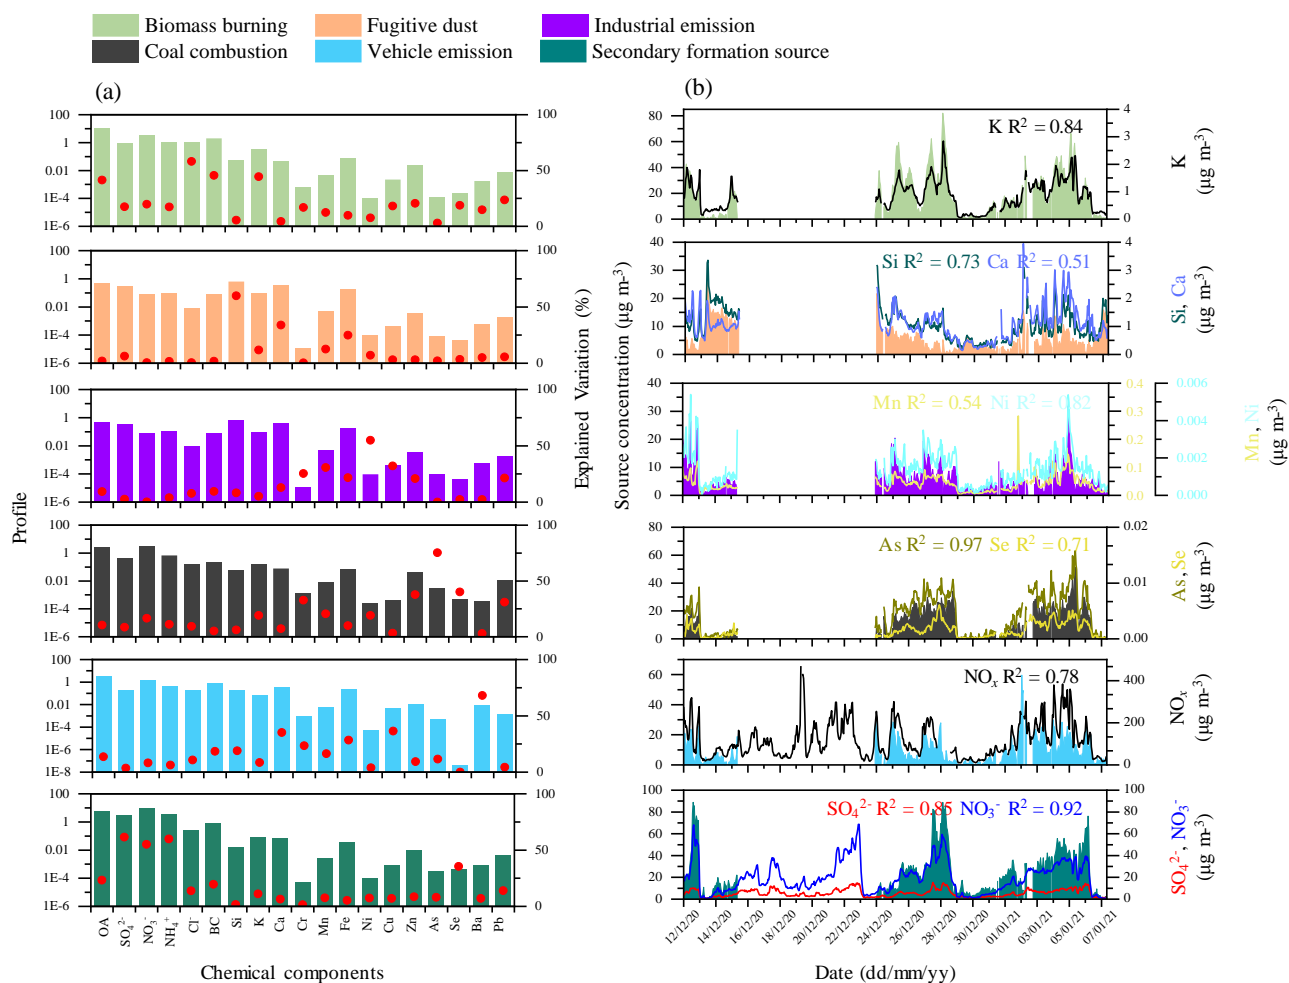

92

93 **Figure S6.** (a) Sources profiles obtained from HERM with a six-factor solution in Xi'an, the columns in each factor  
 94 are the profile that displays the relative relation of the absolute values of variables. The red dot represents the  
 95 explained variation (EV) in species for different factors. (b) Time series plots of sources concentration, including  
 96 biomass burning, fugitive dust, industrial emission, coal combustion, vehicle emission, and secondary nitrate plus  
 97 sulfate formation source. The corresponding time trends of chemical tracers are also shown.

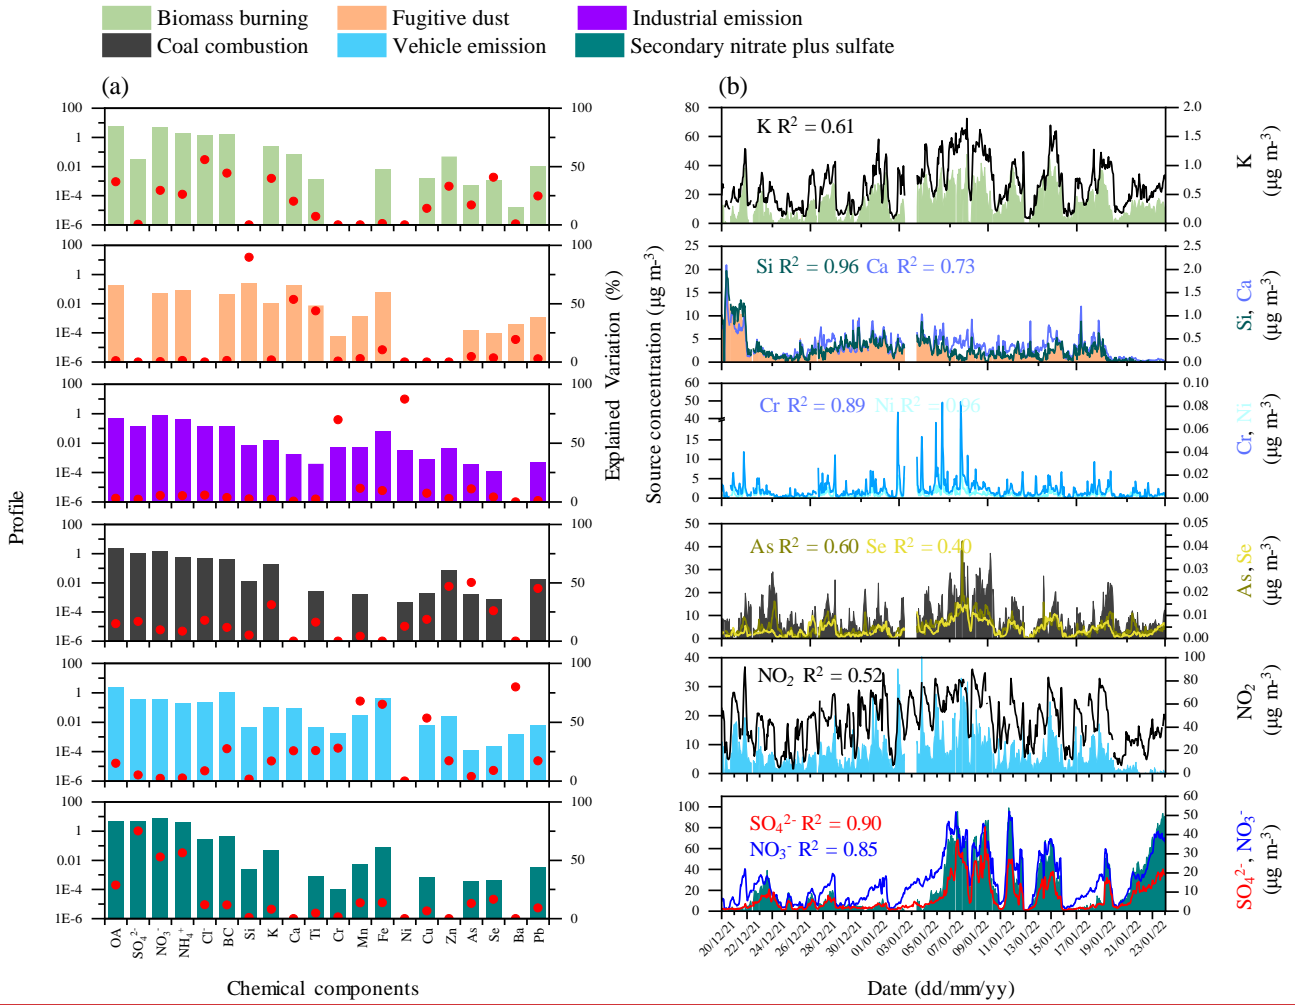

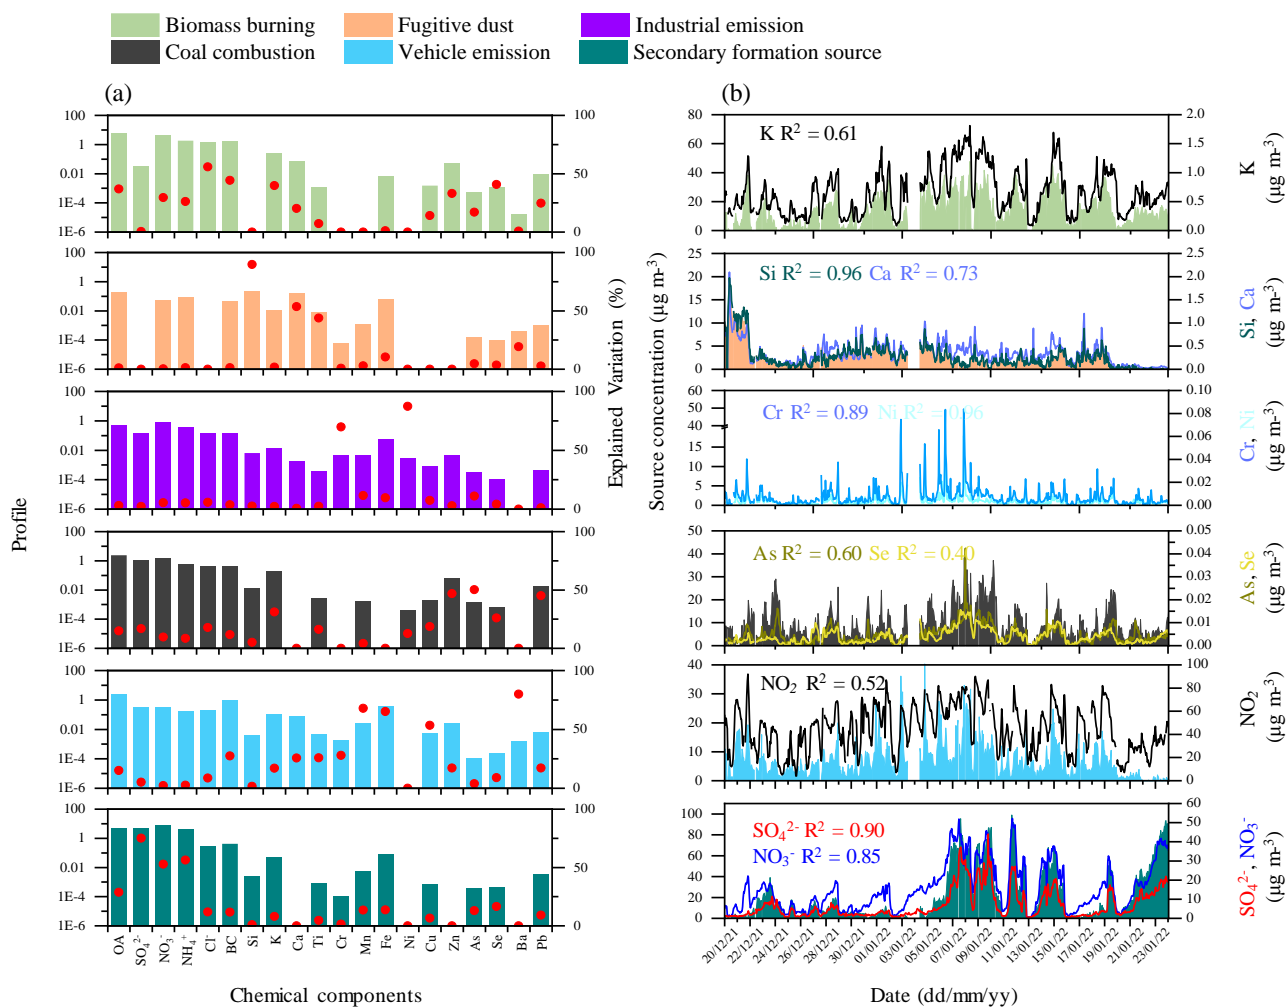

99

100 **Figure S7.** (a) Sources profiles obtained from HERM with a six-factor solution in Shijiazhuang, the columns in each  
 101 factor are the profile that displays the relative relation of the absolute values of variables. The red dot represents the  
 102 explained variation (EV) in species for different factors. (b) Time series plots of sources concentration, including  
 103 biomass burning, fugitive dust, industrial emission, coal combustion, vehicle emission, and secondary nitrate plus  
 104 sulfate formation source. The corresponding time trends of chemical tracers are also shown.



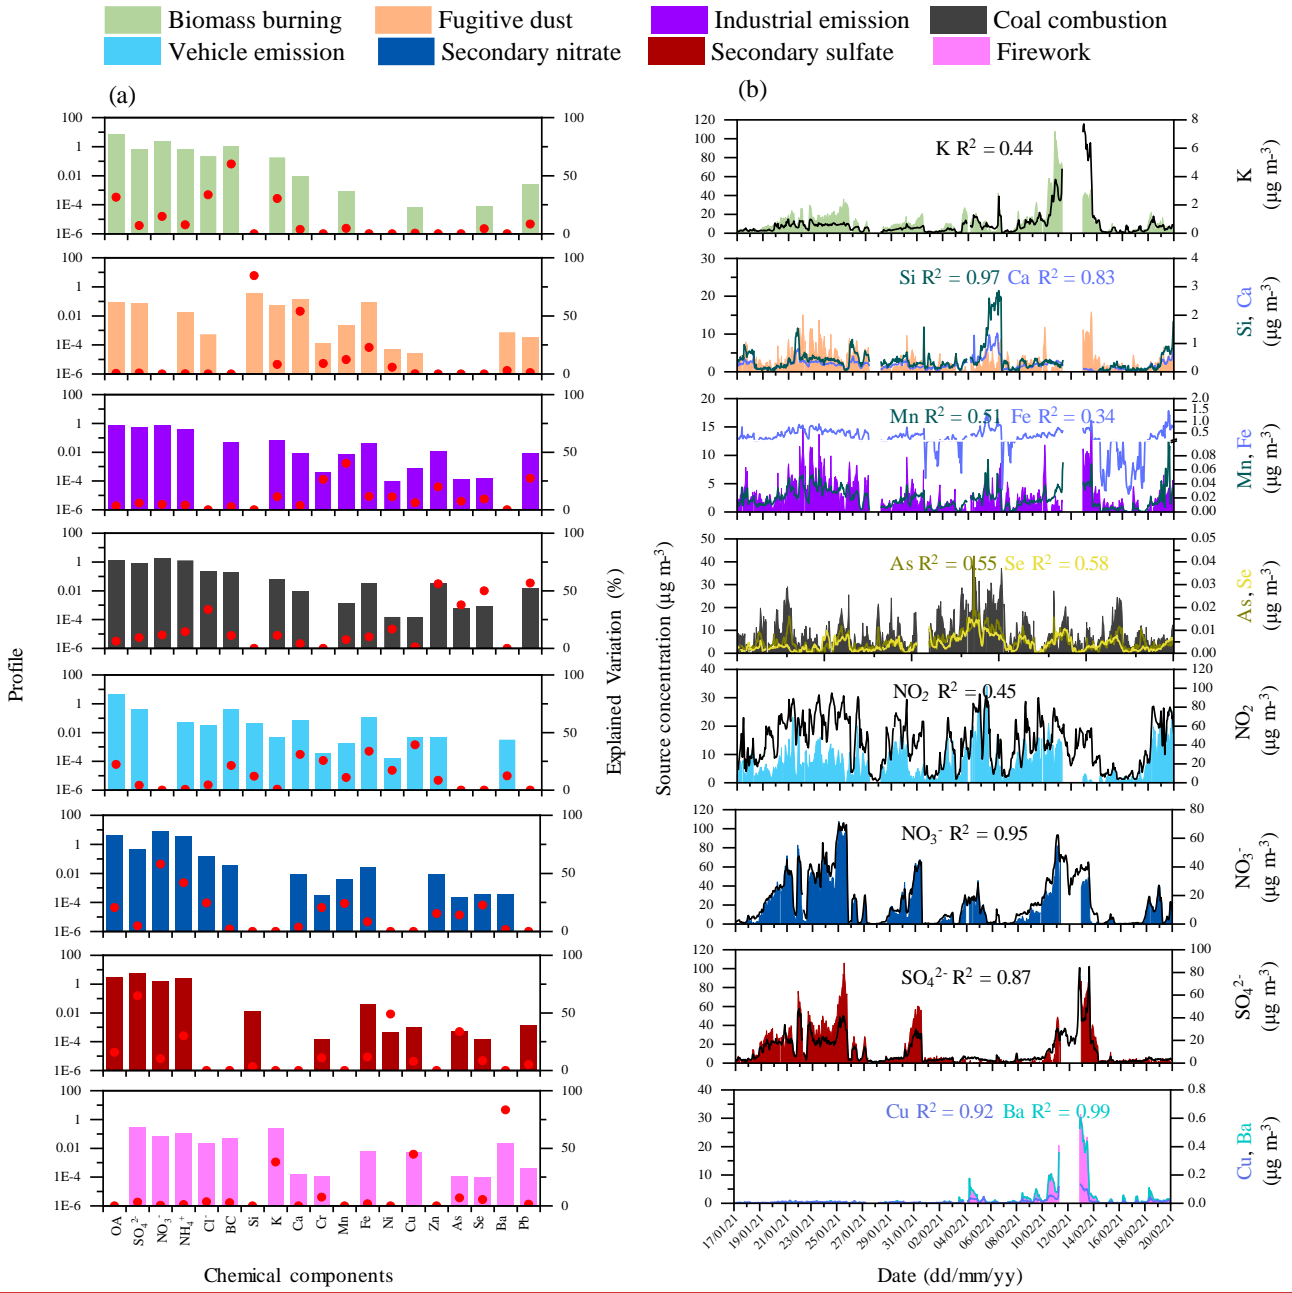

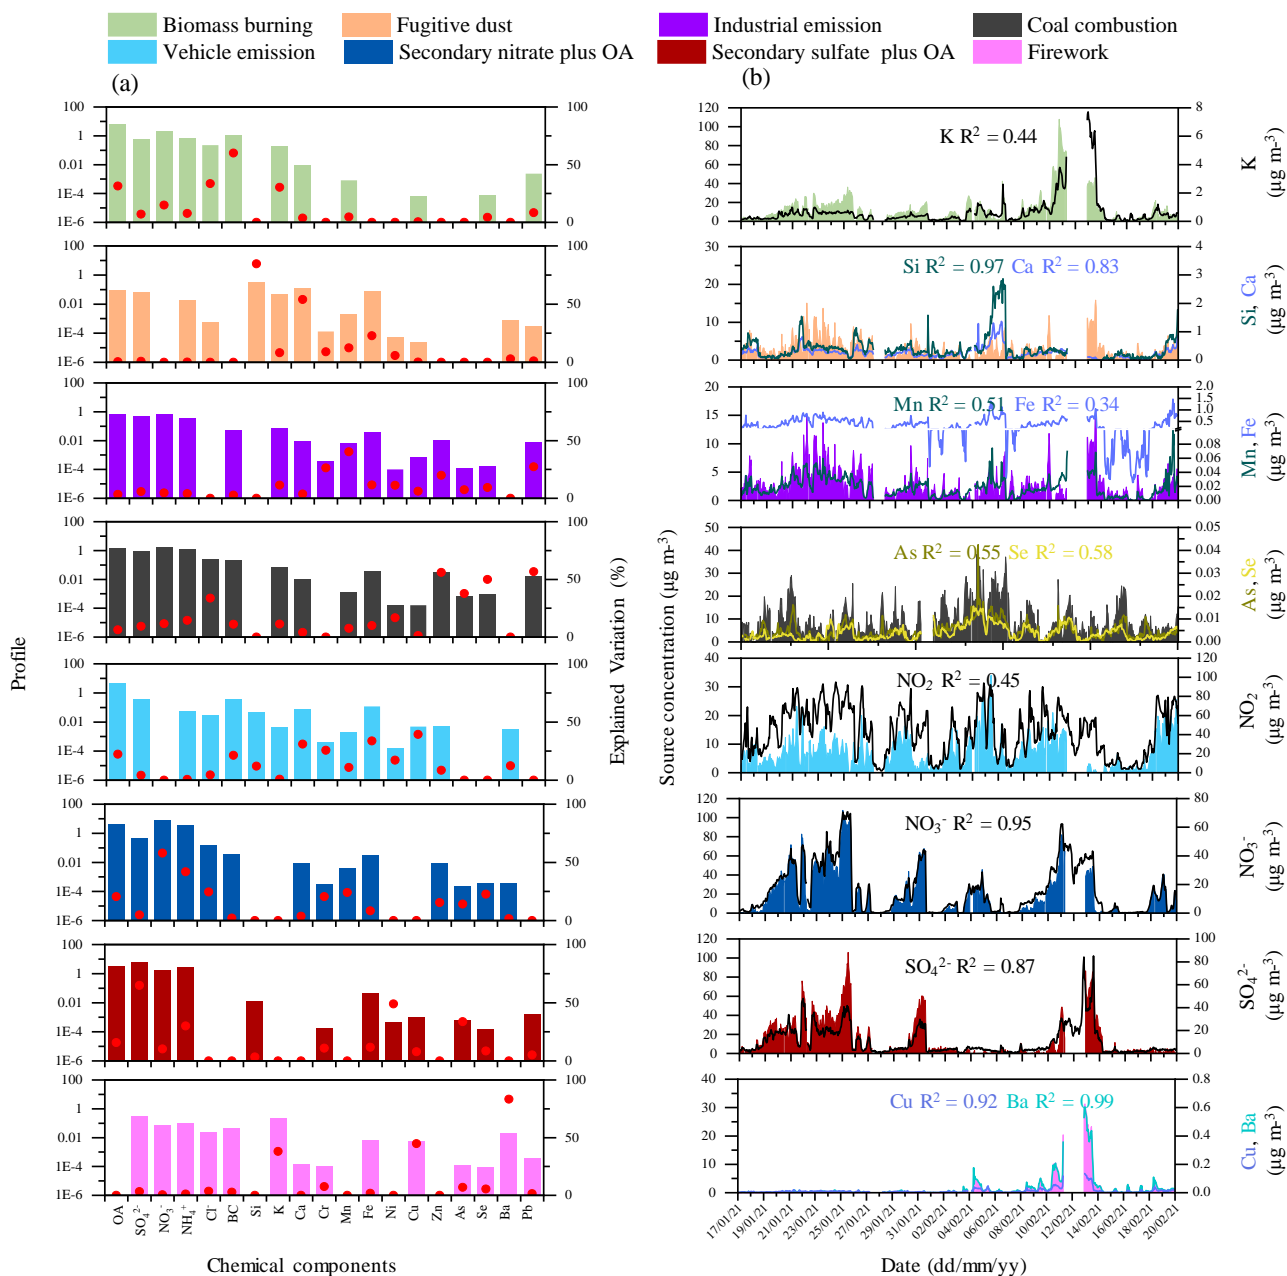

106

107 **Figure S8.** (a) Sources profiles obtained from HERM with an eight-factor solution in Beijing, the columns in each  
 108 factor are the profile that displays the relative relation of the absolute values of variables. The red dot represents the  
 109 explained variation (EV) in species for different factors. (b) Time series plots of sources concentration, including  
 110 biomass burning, fugitive dust, industrial emission, coal combustion, vehicle emission, secondary nitrate plus OA,  
 111 secondary sulfate plus OA, and firework. The corresponding time trends of chemical tracers are also shown.

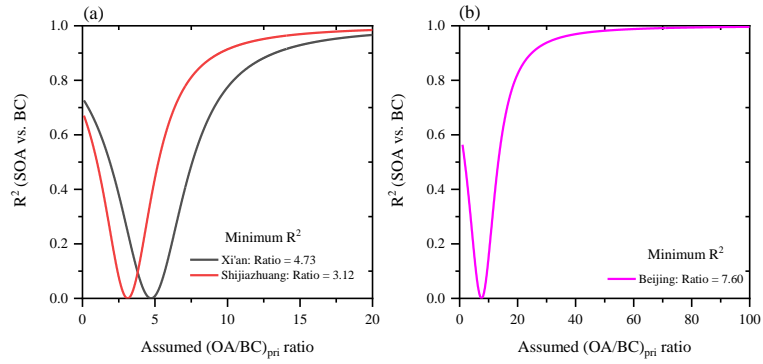

112

113 **Figure S9.** Coefficients of determination ( $R^2$ ) for SOA versus BC mass concentration plotted against assumed  
 114 ratios for OA to BC in primary emissions ( $(OA/BC)_{pri}$ ) in Xi'an, Shijiazhuang and Beijing.

115

116

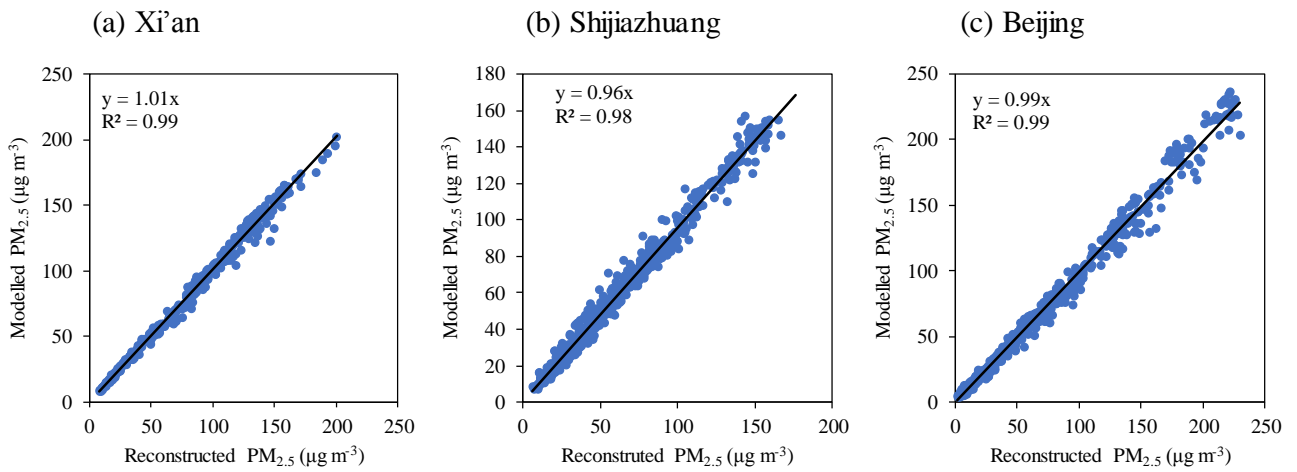

117

118 **Figure S9S10.** Correlation between reconstructed  $PM_{2.5}$  and modeled  $PM_{2.5}$  mass concentrations derived by HERM  
 119 in Xi'an, Shijiazhuang, and Beijing with optimal solutions

120

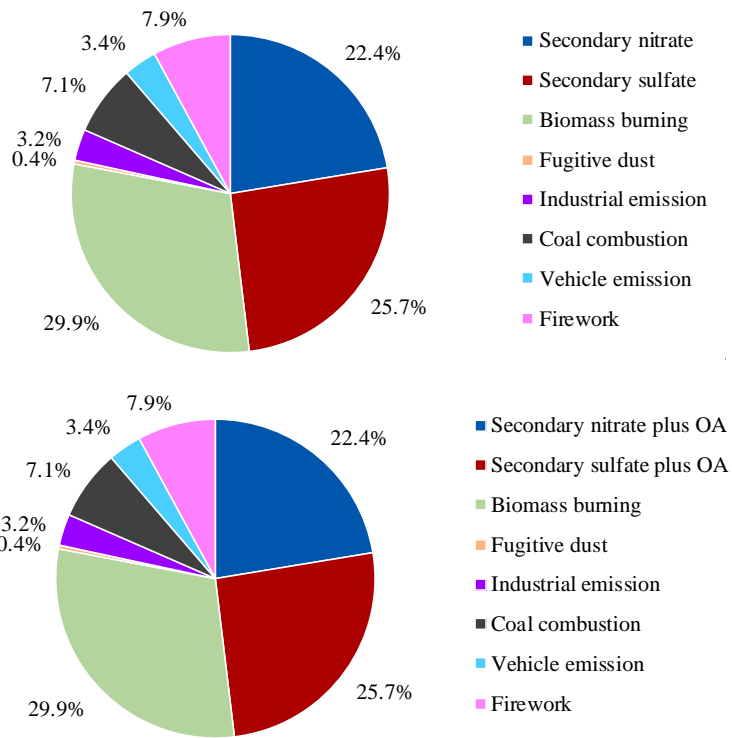

121

122

123

124

**Figure S10S11.** Source contribution of PM<sub>2.5</sub> during Chinese Spring Festival (from New Year's Eve to January 3<sup>rd</sup> of the Lunar Calendar) in Beijing

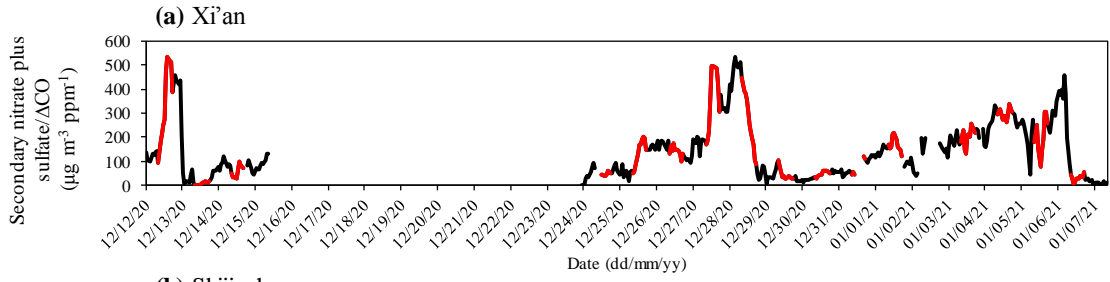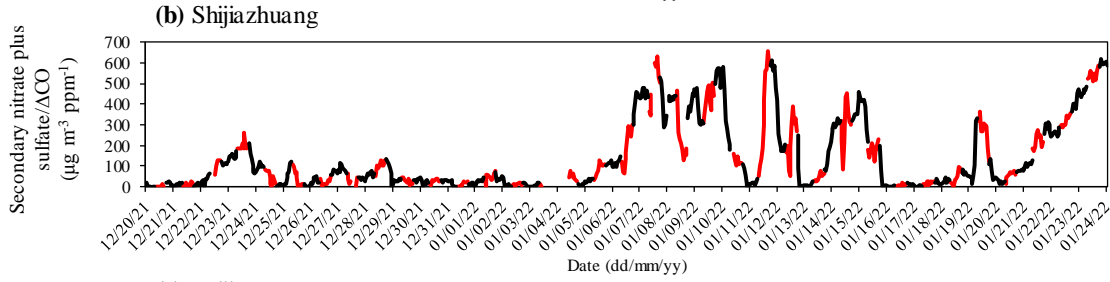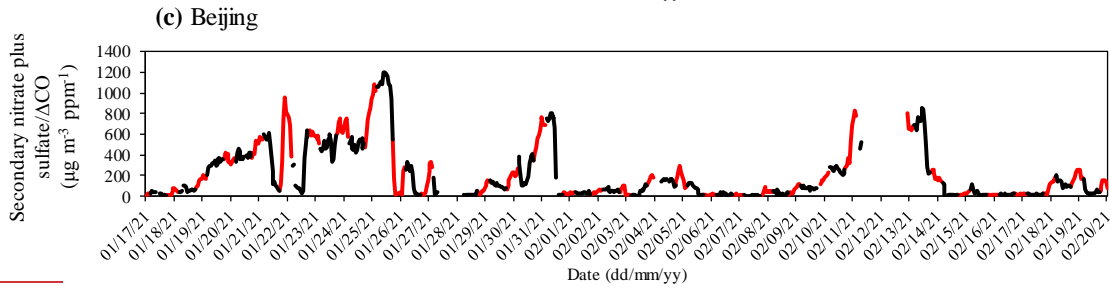

125

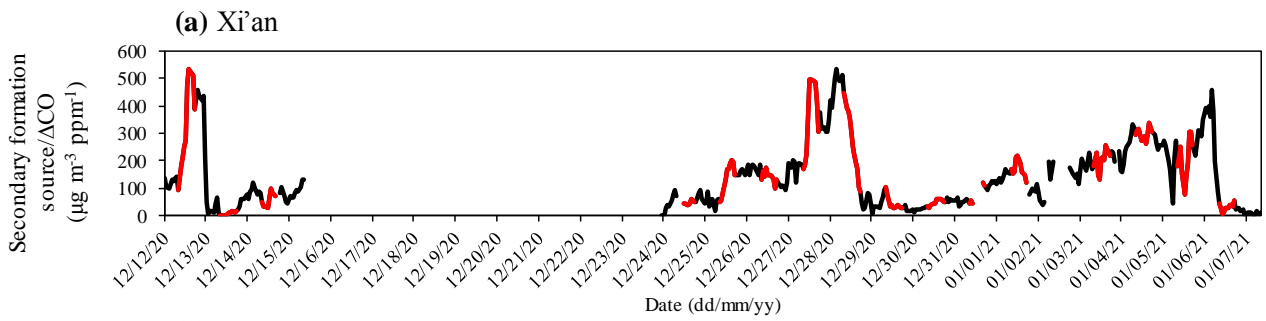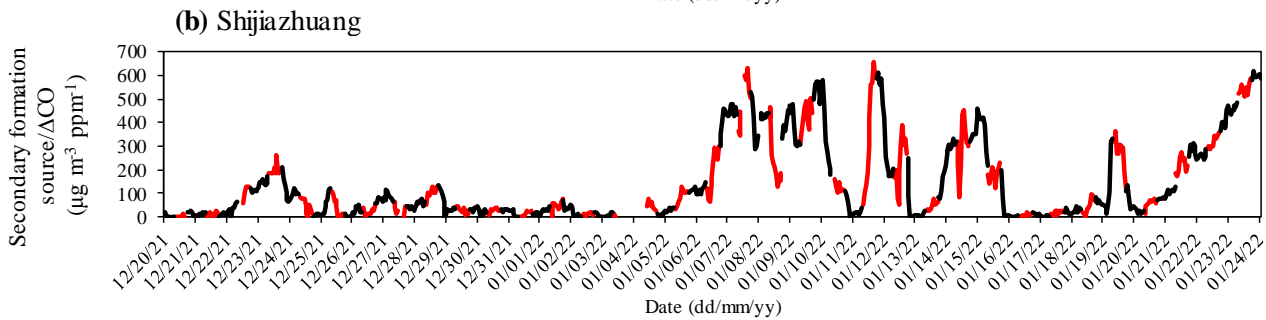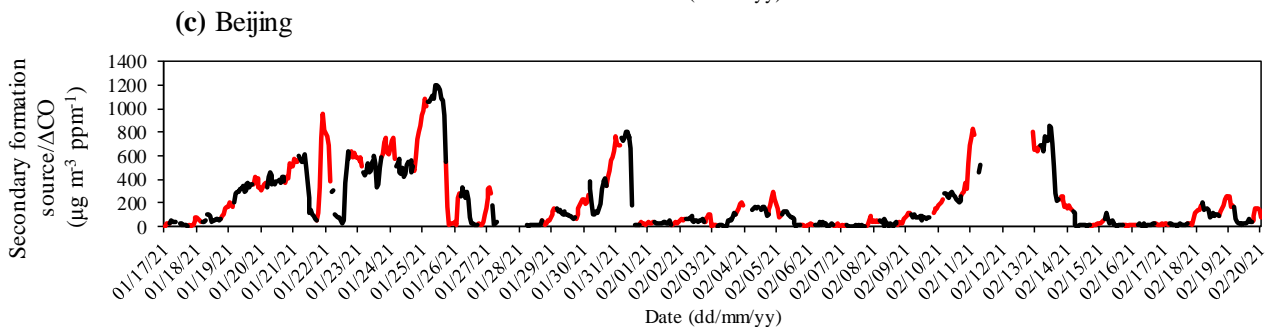

126

127 **Figure S12**. Time series plots of secondary ~~nitrate plus sulfate~~ formation source/ $\Delta$ CO in (a) Xi'an, (b)  
 128 Shijiazhuang, and (c) Beijing. The red and black lines represent daytime (08:00-17:00 LST) and nighttime  
 129 (18:00 - 07:00 the next day LST), respectively.

130

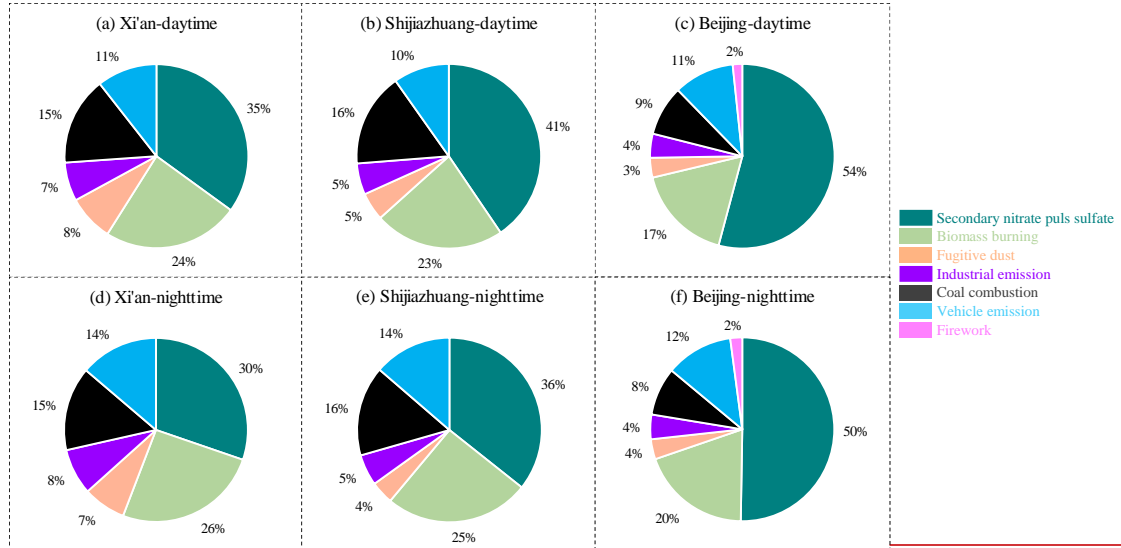

131

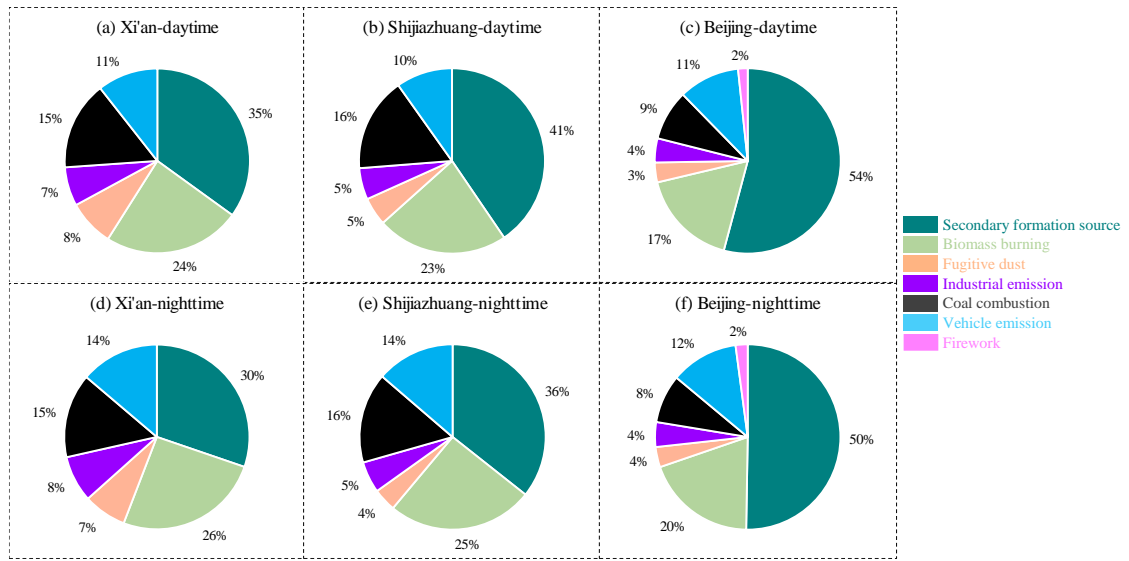

132

133 **Figure S13**. Source contribution of PM<sub>2.5</sub> in three pilot cities during daytime and nighttime, respectively.

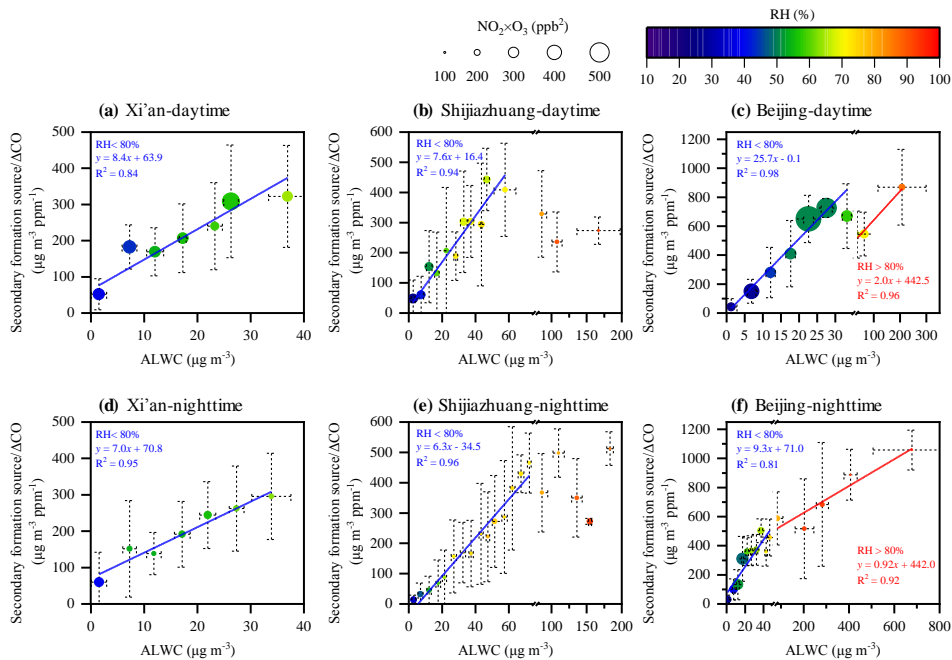

134

135 **Figure S14.** Correlation of secondary formation source/ $\Delta\text{CO}$  and ALWC during daytime (08:00–17:00 LST, a–c)  
 136 and nighttime (18:00–7:00 the next day LST, d–f) in Xi'an, Shijiazhuang, and Beijing, respectively. The points and  
 137 error bar represent the mean values and standard deviation values of secondary formation source / $\Delta\text{CO}$  and ALWC  
 138 in each bin. In Xi'an, each bin is  $5 \mu\text{g m}^{-3}$  ( $\Delta\text{ALWC} = 5 \mu\text{g m}^{-3}$ ). In Shijiazhuang, each bin is  $5 \mu\text{g m}^{-3}$  ( $\Delta\text{ALWC} = 5$   
 139  $\mu\text{g m}^{-3}$ ) when ALWC ranged from 0 to  $75 \mu\text{g m}^{-3}$ , but  $25 \mu\text{g m}^{-3}$  ( $\Delta\text{ALWC} = 25 \mu\text{g m}^{-3}$ ) for ALWC ranged from 75 to  
 140  $200 \mu\text{g m}^{-3}$  due to limitations in data. In Beijing, during daytime, each bin is  $5 \mu\text{g m}^{-3}$  ( $\Delta\text{ALWC} = 5 \mu\text{g m}^{-3}$ ) when  
 141 ALWC ranged from 0 to  $40 \mu\text{g m}^{-3}$ , but  $100 \mu\text{g m}^{-3}$  ( $\Delta\text{ALWC} = 100 \mu\text{g m}^{-3}$ ) for ALWC ranged from 40 to  $450 \mu\text{m}$   
 142 <sup>3</sup> due to limitations in data. During nighttime, each bin is  $5 \mu\text{g m}^{-3}$  ( $\Delta\text{ALWC} = 5 \mu\text{g m}^{-3}$ ) when ALWC ranged from 0  
 143 to  $50 \mu\text{g m}^{-3}$ , but  $100 \mu\text{g m}^{-3}$  ( $\Delta\text{ALWC} = 100 \mu\text{g m}^{-3}$ ) for ALWC ranged from 50 to  $900 \mu\text{g m}^{-3}$  due to limitations in  
 144 data.

145

146

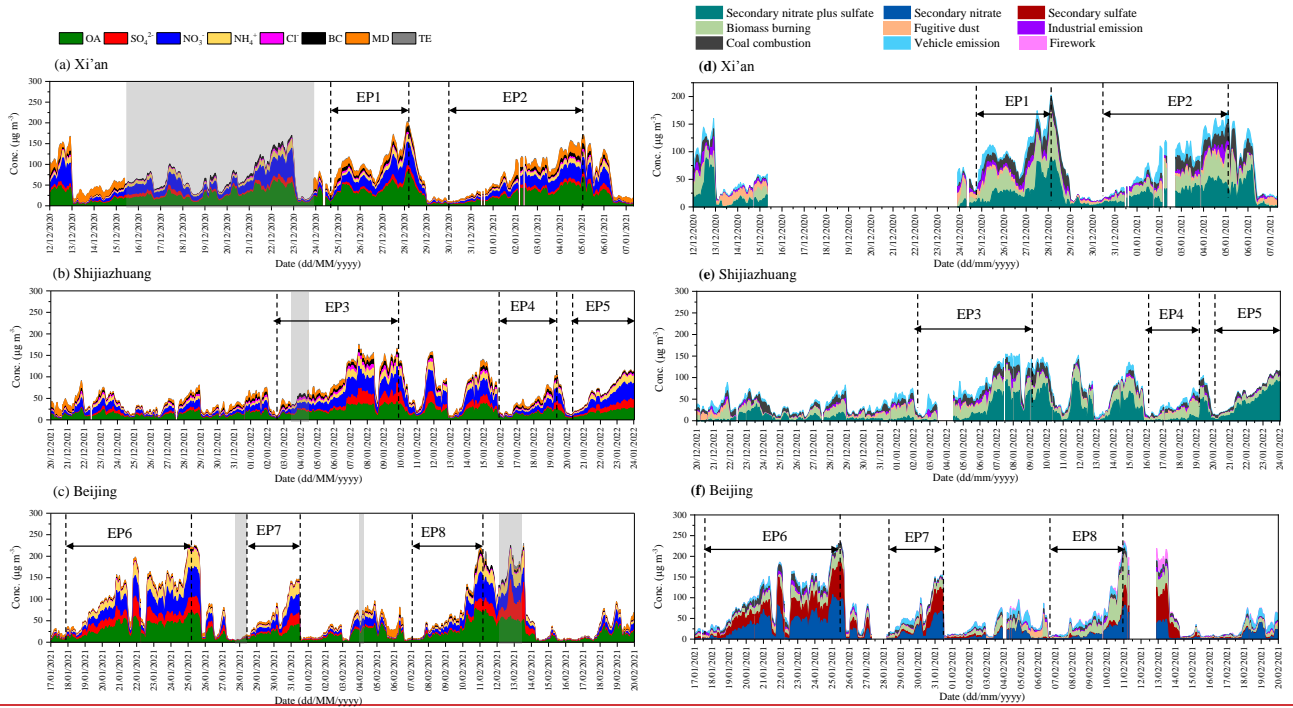

147

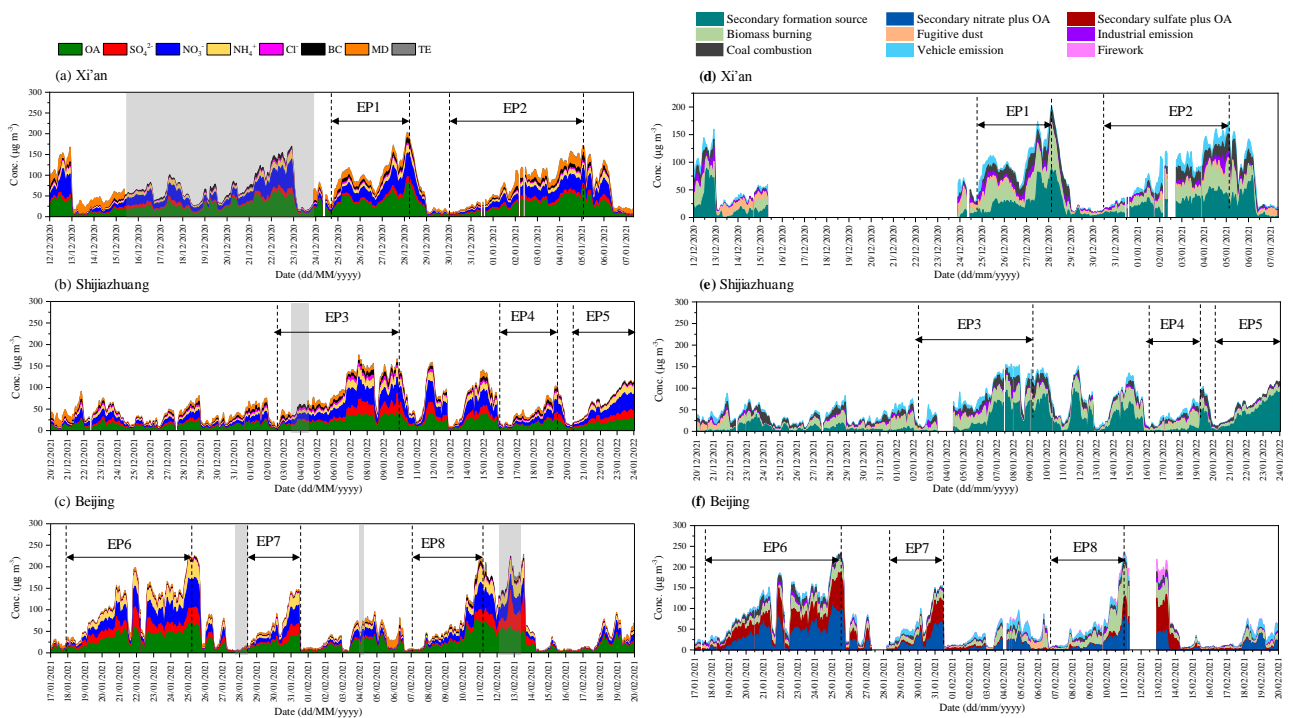

148 **Figure S13S15.** The pollution episodes selection according to temporal variation of PM<sub>2.5</sub> chemical components (a-  
 149 c) and source contribution (d-f) during the campaigns in Xi'an, Shijiazhuang, and Beijing, respectively. The gray  
 150 shape parts were lack of MD values due to the out-of-order Xact625, and missing values in the time series owing to  
 151 the out-of-order ACSM, AE33, and Xact625 at the same time.



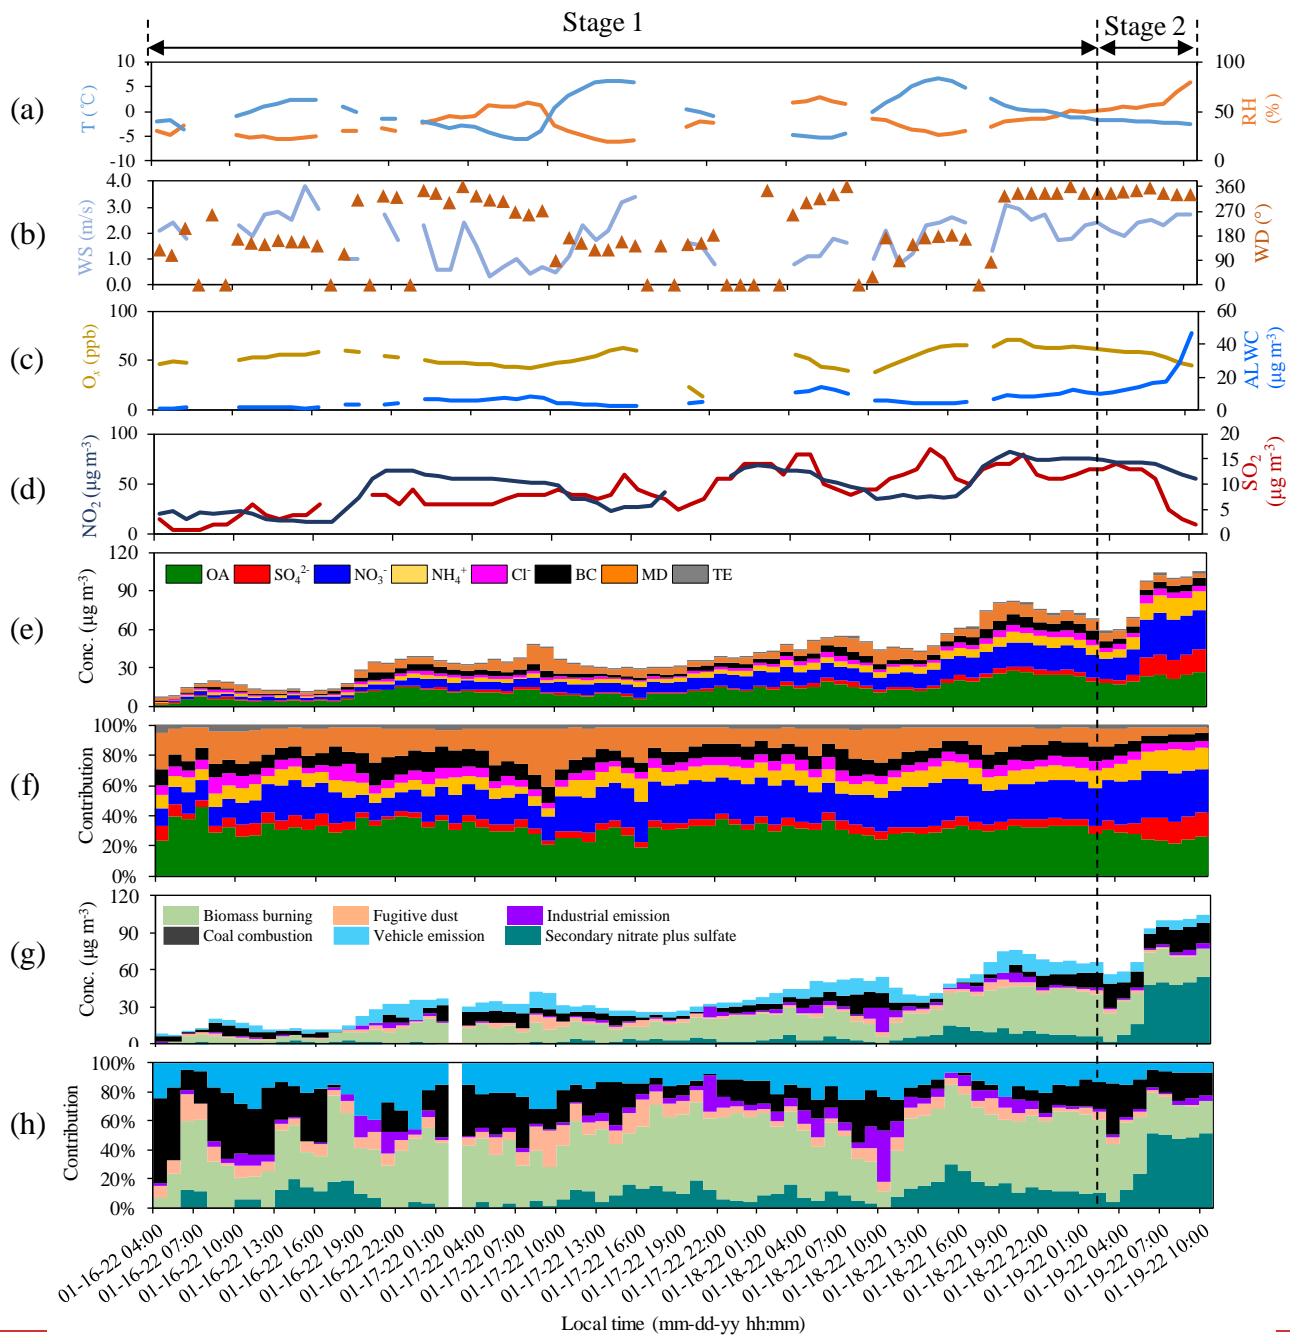

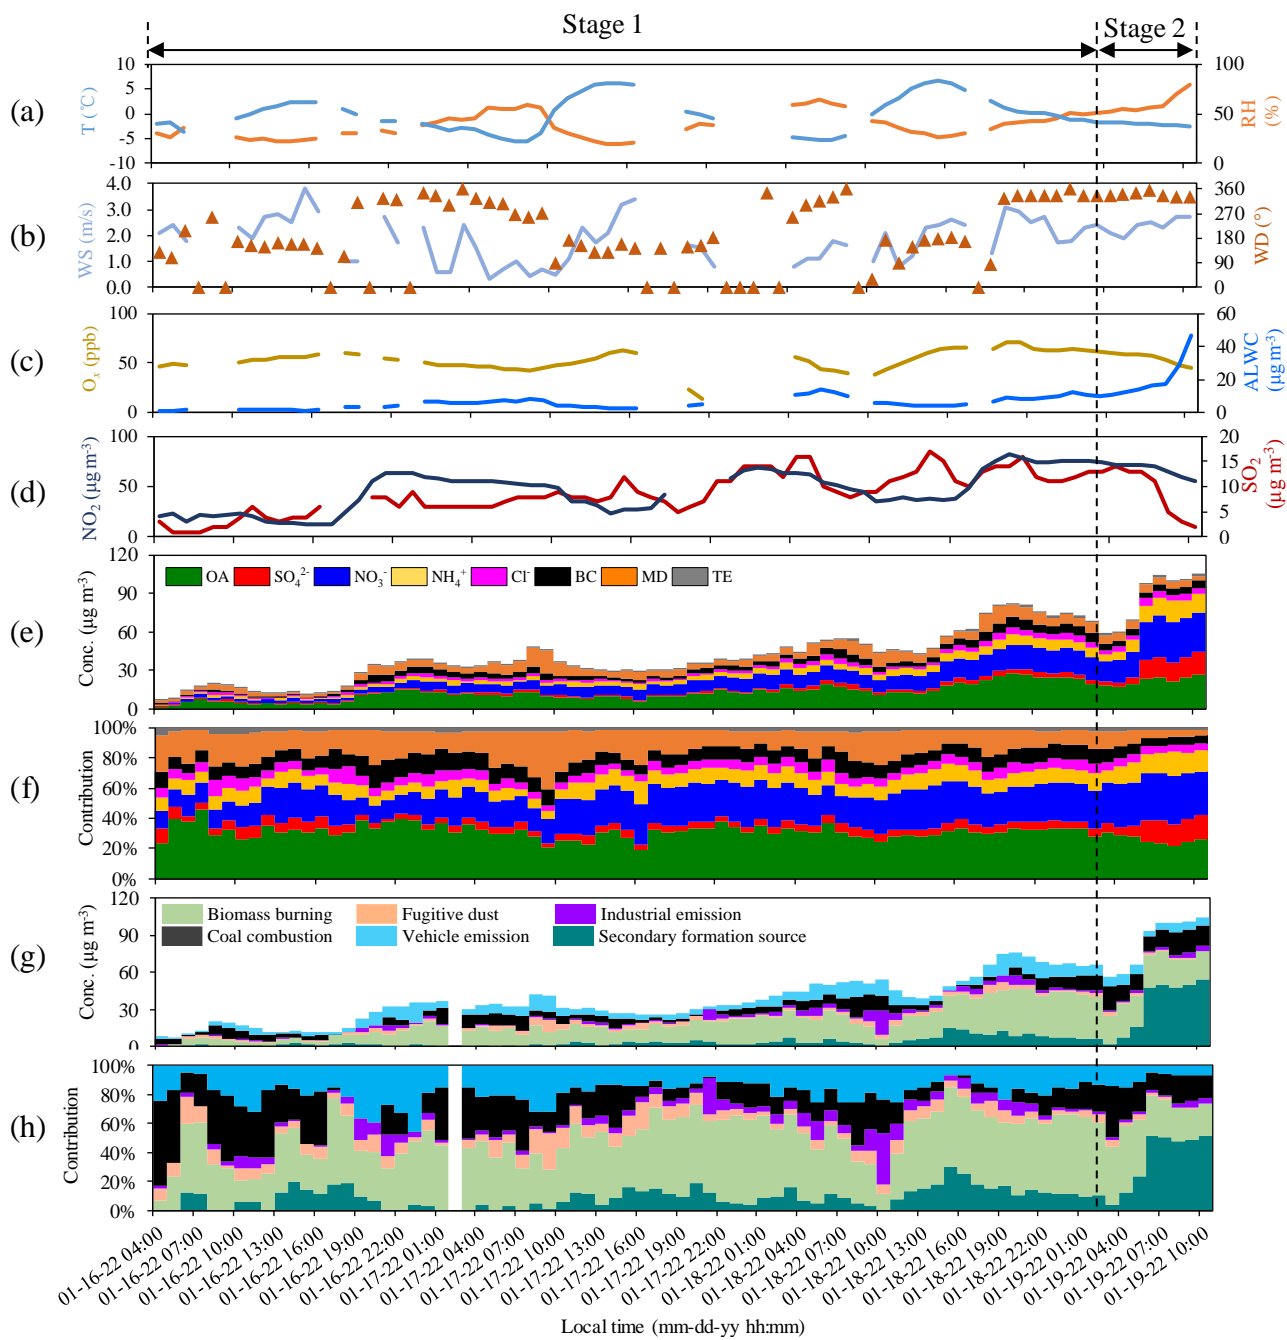

153

154 **Figure S14.6** Time series of T and RH (a), WS and WD (b),  $O_x$  and ALWC (c),  $NO_2$  and  $SO_2$  (d), chemical  
 155 components (e,f), and source contribution (g, h) of  $PM_{2.5}$  during EP4 in Shijiazhuang.

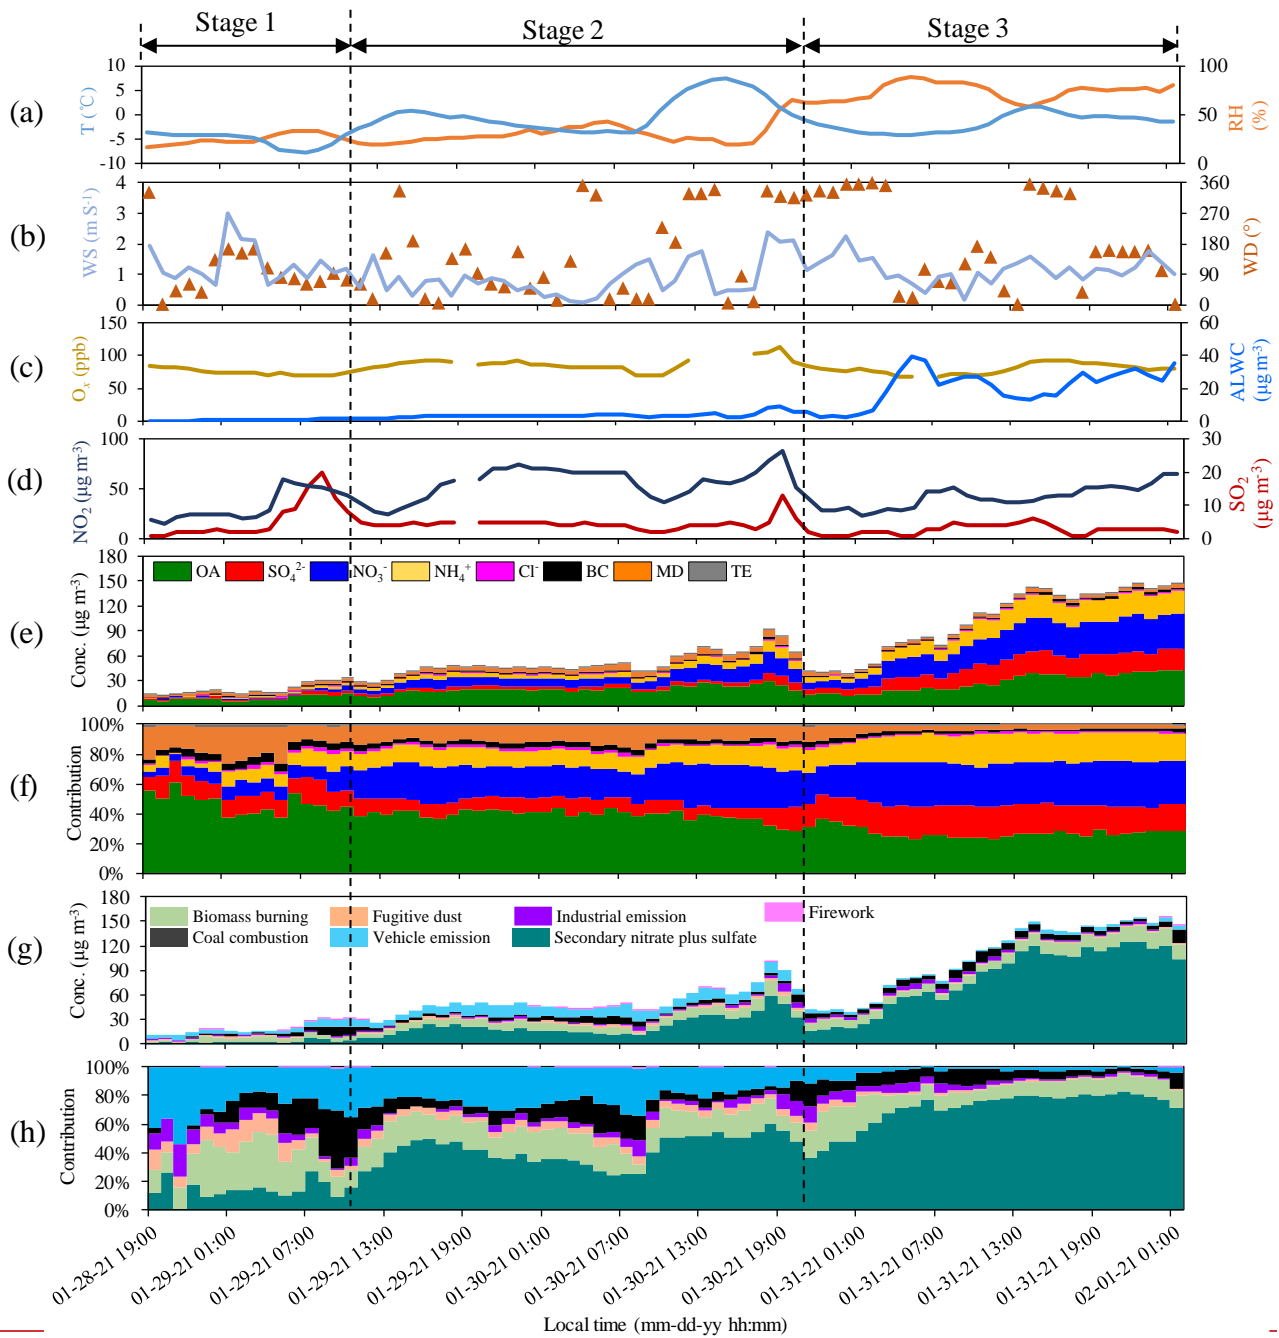

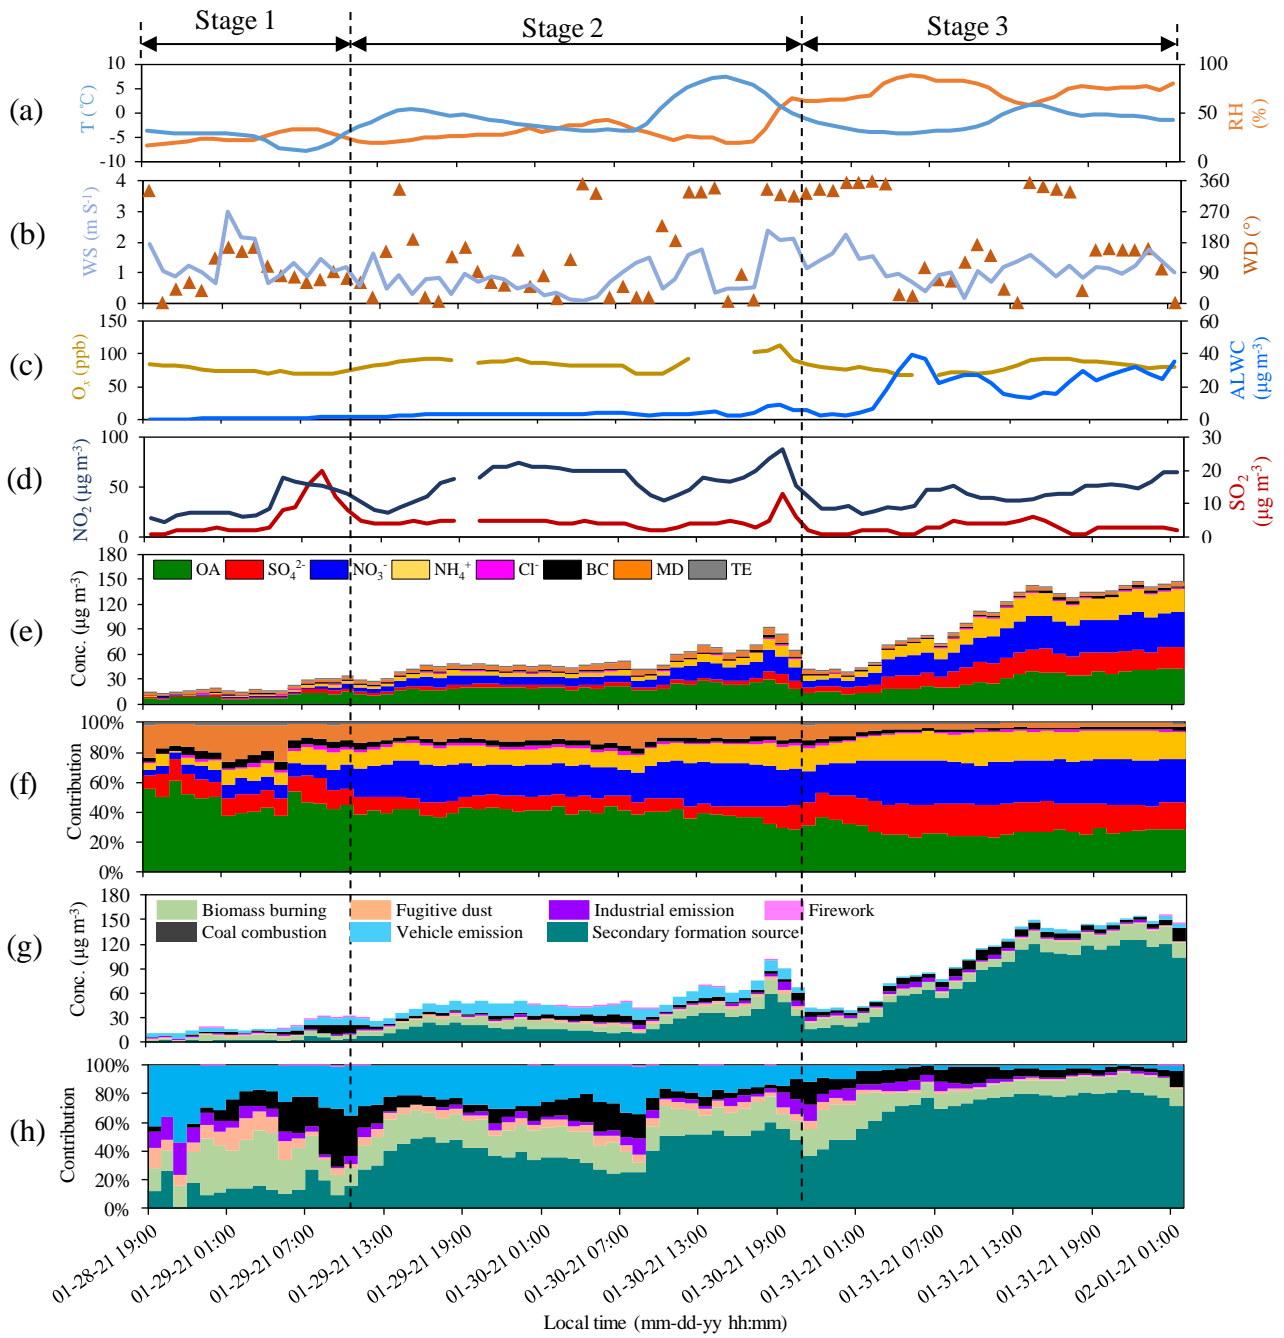

157

158 **Figure S15S17.** Time series of T and RH (a), WS and WD (b), O<sub>x</sub> and ALWC (c), NO<sub>2</sub> and SO<sub>2</sub> (d), chemical  
 159 components (e, f), and source contribution (g, h) of PM<sub>2.5</sub> during EP7 in Beijing

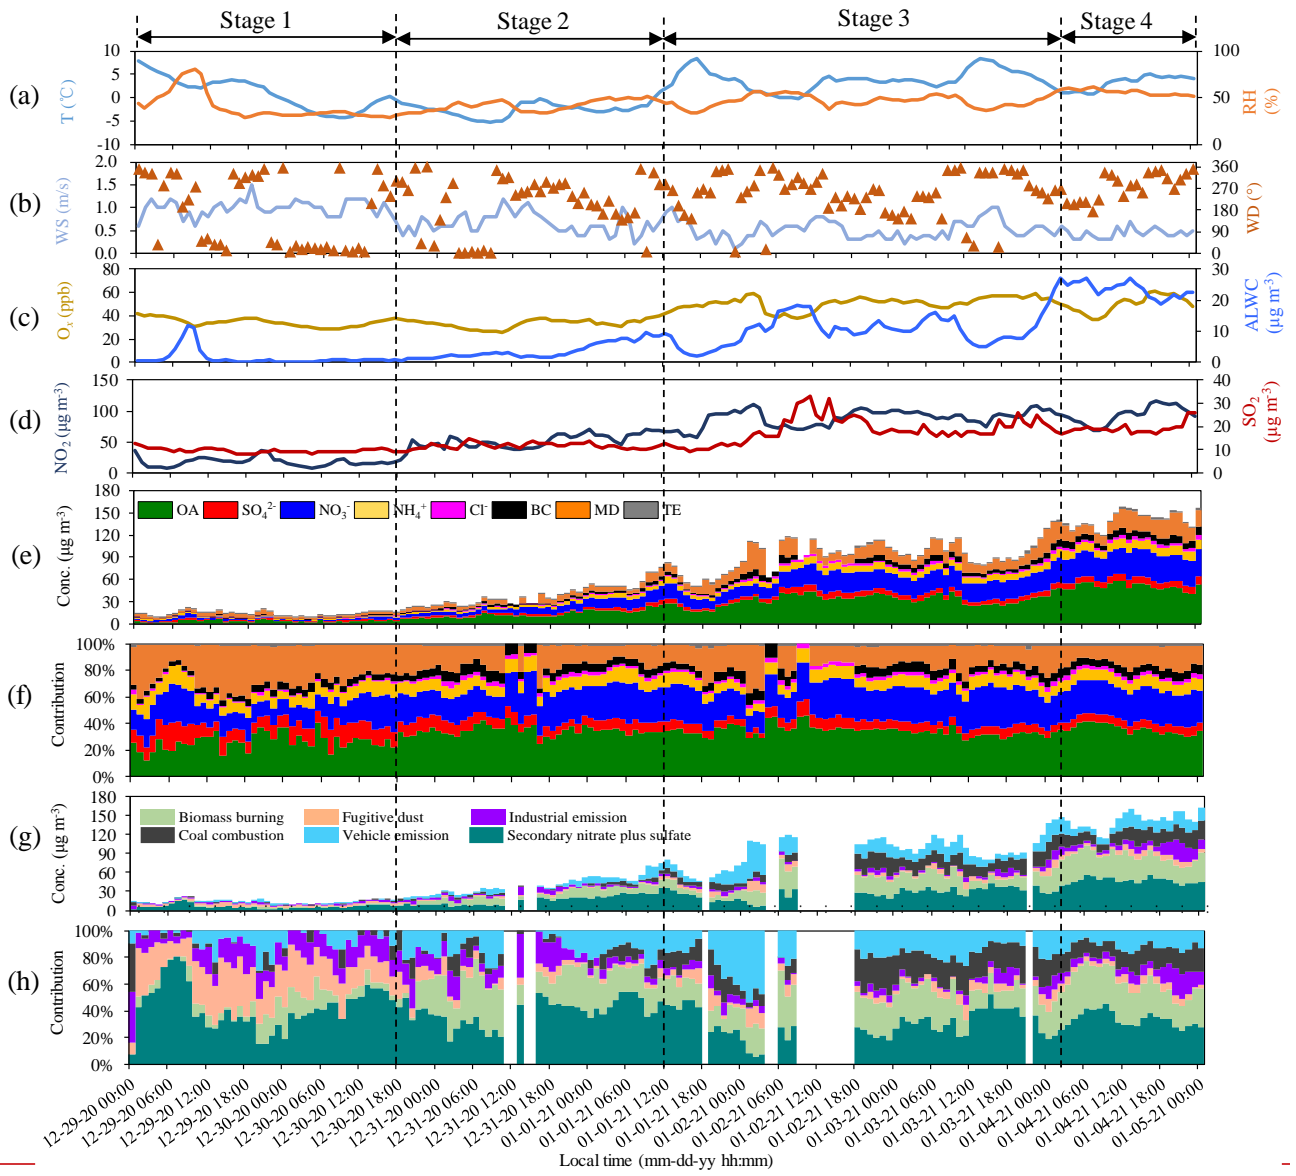

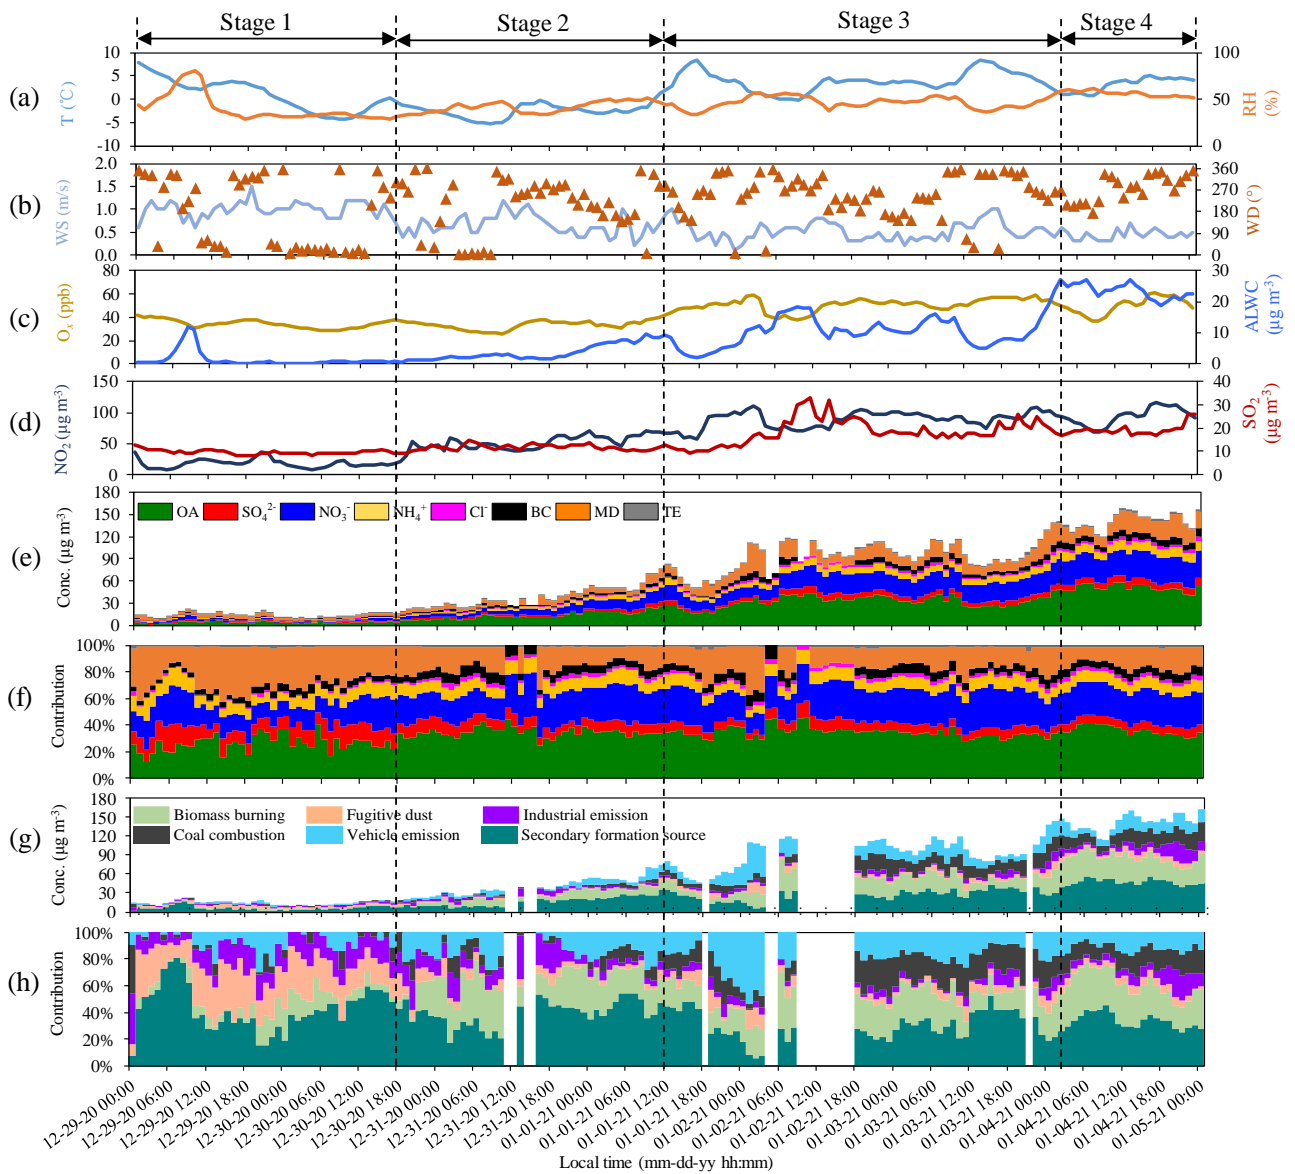

161

162 **Figure S16S18.** Time series of T and RH (a), WS and WD (b), O<sub>x</sub> and ALWC (c), NO<sub>2</sub> and SO<sub>2</sub> (d), chemical  
 163 components (e, f), and source contribution (g, h) of PM<sub>2.5</sub> during EP2 in Xi'an.

164

(a) The first round  
Period: 2012/6-2013/12  
PM<sub>2.5</sub>: 90 μg cm<sup>-3</sup>

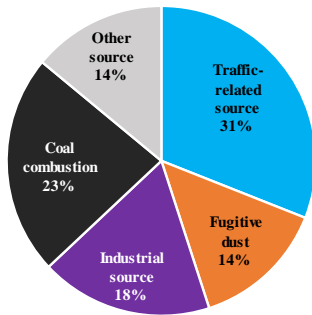

(b) The second round  
Period: 2017/1-2018/5  
PM<sub>2.5</sub>: 58 μg cm<sup>-3</sup>

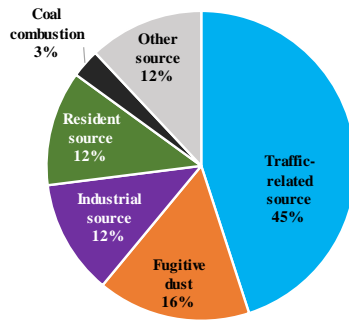

(c) The third round  
Period: 2020/1-2021/6  
PM<sub>2.5</sub>: 38 μg cm<sup>-3</sup>

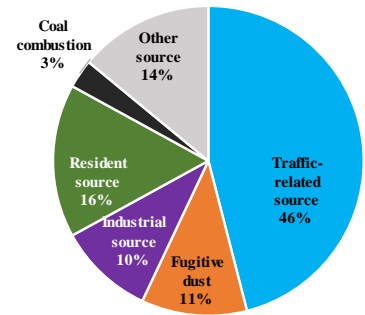

165

166

167

168

**Figure S19.** PM<sub>2.5</sub> sources apportionment in Beijing released by Beijing Municipal Ecology and Environment Bureau in the last decade (<http://sthjj.beijing.gov.cn/so/s?tab=all&sourceCode=1100000122>, in Chinese).

169 **Table S1.** Detailed information on complementary data for sampling sites

| Sampling site | National Air Quality Monitoring Station                     | National Meteorological Station                      | complementary data                                                                                                  |
|---------------|-------------------------------------------------------------|------------------------------------------------------|---------------------------------------------------------------------------------------------------------------------|
| Xi'an         | Gaoxinqiqu station, 1.1km from the sampling site            | Haidian station, 7.6 km from the sampling site       | hourly PM <sub>2.5</sub> , NO <sub>x</sub> , NO <sub>2</sub> , CO, SO <sub>2</sub> , O <sub>3</sub> , WS, WD, T, RH |
| Shijiazhuang  | Gaoxinqu station, 4.2 km from the sampling site             | Shijiazhuang station, 23.8 km from the sampling site | hourly PM <sub>2.5</sub> , NO <sub>2</sub> , CO, SO <sub>2</sub> , O <sub>3</sub> , WS, WD, T, RH                   |
| Beijing       | ChaoyangAotizhongxin station, 1.2 km from the sampling site | Jinghe station, 21.2 km from the sampling site       | hourly PM <sub>2.5</sub> , NO <sub>2</sub> , CO, SO <sub>2</sub> , O <sub>3</sub> , WS, WD, T, RH                   |

170 Note: WS: wind speed, WD: wind direction, T: temperature, RH: relative humidity.

171

172 **Table S2.** The  $\Delta Q/Q_{\text{exp}}$ <sup>a</sup> value with increasing factor number from two to ten of the runs in Xi'an, Shijiazhuang, and  
173 Beijing.

| Parameter <sup>b</sup> | $\Delta Q/Q_{\text{exp}}$ |              |         |
|------------------------|---------------------------|--------------|---------|
|                        | Xi'an                     | Shijiazhuang | Beijing |
| F2-F3                  | 1.3                       | 1.8          | 5.7     |
| F3-F4                  | 0.9                       | 2.2          | 2.3     |
| F4-F5                  | 1.1                       | 1.2          | 1.9     |
| F5-F6                  | 0.4                       | 0.3          | 1.5     |
| F6-F7                  | 0.3                       | 0.3          | 1.5     |
| F7-F8                  | 0.2                       | 0.2          | 0.3     |
| F8-F9                  |                           |              | 0.4     |
| F9-F10                 |                           |              | 0.3     |

174 <sup>a</sup>  $\Delta Q/Q_{\text{exp}}$  means the difference of  $Q/Q_{\text{exp}}$  of two sequent factor numbers.

175 <sup>b</sup> Parameters represent the factor numbers (F) – (F+1).

176



177 **Table S3.** Sources diagnostics with increasing factor numbers from four to ten of the runs in Xi'an, Shijiazhuang,  
 178 and Beijing.

| Factor number | Sources identification                                                                                                                                                 |                                                                                                                                                                                                                                                      |                                                                                                                                                                                |
|---------------|------------------------------------------------------------------------------------------------------------------------------------------------------------------------|------------------------------------------------------------------------------------------------------------------------------------------------------------------------------------------------------------------------------------------------------|--------------------------------------------------------------------------------------------------------------------------------------------------------------------------------|
|               | Xi'an                                                                                                                                                                  | Shijiazhuang                                                                                                                                                                                                                                         | Beijing                                                                                                                                                                        |
| 4             | Secondary <del>nitrate</del> <del>plus</del> <del>sulfate</del> <del>formation</del> source mixed with biomass burning and coal burning mixed with industrial emission | i) Secondary <del>nitrate</del> <del>plus</del> <del>sulfate</del> <del>formation</del> source mixed with primary sources including biomass burning and coal combustion<br>ii) Biomass burning, coal combustion, and vehicle emission was also mixed | i) Secondary sources mixed with primary sources including biomass burning, coal combustion, and vehicle emission<br>ii) Biomass burning and coal combustion was mixed          |
| 5             | Secondary <del>nitrate</del> <del>plus</del> <del>sulfate</del> <del>formation</del> source mixed with biomass burning                                                 | Biomass burning, coal combustion, and vehicle emissions were mixed                                                                                                                                                                                   | Secondary sulfate <del>plus</del> <del>OA</del> mixed with coal combustion and industrial emission; secondary nitrate <del>plus</del> <del>OA</del> mixed with biomass burning |
| 6             | Six individual sources were identified                                                                                                                                 | Six individual sources were identified                                                                                                                                                                                                               | Secondary sulfate <del>plus</del> <del>OA</del> mixed with coal combustion and secondary nitrate <del>plus</del> <del>OA</del> mixed with industrial emission                  |
| 7             | Vehicle emission was split into two profiles<br>Vehicle emission and industrial                                                                                        | Coal combustion was split into two profiles<br>Vehicle emission and coal combustion                                                                                                                                                                  | Secondary sulfate <del>plus</del> <del>OA</del> mixed with coal combustion                                                                                                     |
| 8             | emission was split into two profiles, respectively.                                                                                                                    | were split into two profiles, respectively.                                                                                                                                                                                                          | Eight individual sources were identified                                                                                                                                       |
| 9             |                                                                                                                                                                        |                                                                                                                                                                                                                                                      | Coal combustion was split into two profiles                                                                                                                                    |
| 10            |                                                                                                                                                                        |                                                                                                                                                                                                                                                      | Coal combustion and biomass burning were split into two profiles, respectively.                                                                                                |

180 **Table S4.** Average concentrations of reconstructed PM<sub>2.5</sub> and its chemical species in Xi'an, Shijiazhuang, and Beijing  
 181 during the campaign\* ( $\mu\text{g m}^{-3}$ )

| Chemical Species                | Xi'an       | Shijiazhuang | Beijing     |
|---------------------------------|-------------|--------------|-------------|
| Reconstructed PM <sub>2.5</sub> | 77 ± 47     | 60 ± 39      | 64 ± 57     |
| OA                              | 25.9 ± 18.0 | 16.0 ± 9.7   | 22.1 ± 18.1 |
| SO <sub>4</sub> <sup>2-</sup>   | 5.2 ± 3.4   | 7.0 ± 7.6    | 9.6 ± 11.3  |
| NO <sub>3</sub> <sup>-</sup>    | 18.5 ± 14.5 | 15.8 ± 12.5  | 15.2 ± 16.7 |
| NH <sub>4</sub> <sup>+</sup>    | 6.2 ± 4.5   | 7.0 ± 5.5    | 9.2 ± 10.3  |
| Cl <sup>-</sup>                 | 1.9 ± 1.5   | 2.8 ± 2.2    | 0.7 ± 0.8   |
| BC                              | 4.5 ± 3.2   | 3.9 ± 2.5    | 1.9 ± 1.8   |
| MD <sup>a</sup>                 | 13.2 ± 7.0  | 6.0 ± 4.0    | 4.8 ± 3.8   |
| TE <sup>b</sup>                 | 1.1 ± 0.7   | 1.0 ± 0.6    | 0.9 ± 1.5   |

182 \* Data during Xact625 failure shown in Figure S2 was excluded to calculate average concentration of campaign

183 <sup>a</sup> MD means mineral dust, which is equal to 2.20Al + 2.49Si + 1.63Ca + 2.42Fe + 1.94Ti

184 <sup>b</sup> TE means trace elements which is equal to K + Cr + Mn + Ni + Cu + Zn + As + Se + Ba + Pb

185

186 **Table S5.** The nitrogen oxidation ratio (NOR) and sulfur oxidation ratio (SOR) in Xi'an, Beijing, and Shijiazhuang  
 187 during the campaigns<sup>a</sup>

| Parameters | Xi'an       | Shijiazhuang | Beijing     |
|------------|-------------|--------------|-------------|
| NOR        | 0.15 ± 0.08 | 0.20 ± 0.11  | 0.16 ± 0.12 |
| SOR        | 0.18 ± 0.08 | 0.36 ± 0.25  | 0.48 ± 0.23 |

188 <sup>a</sup> NOR =  $n(\text{NO}_3^-)/(n(\text{NO}_3^-) + n(\text{NO}_2))$ ; SOR =  $n(\text{SO}_4^{2-})/(n(\text{SO}_4^{2-}) + n(\text{SO}_2))$ . where  $n(\text{NO}_3^-)$ ,  $n(\text{NO}_2)$ ,  $n(\text{SO}_4^{2-})$ , and  $n(\text{SO}_2)$  are the molar  
 189 concentrations of NO<sub>3</sub><sup>-</sup>, NO<sub>2</sub>, SO<sub>4</sub><sup>2-</sup>, and SO<sub>2</sub>, respectively.

190

191 **Table S6.** Average concentrations of SOA in Xi'an, Shijiazhuang, and Beijing during sampling periods estimated by BC-  
 192 tracer method and source apportionment results ( $\mu\text{g m}^{-3}$ )

| SOA                                 | Xi'an     | Shijiazhuang | Beijing   |
|-------------------------------------|-----------|--------------|-----------|
| SOA <sub>BC-tracer</sub>            | 5.1 ± 5.8 | 4.2 ± 4.4    | 8.0 ± 9.0 |
| SOA <sub>source apportionment</sub> | 6.0 ± 4.1 | 4.6 ± 2.8    | 8.2 ± 6.7 |

193

194

195  
196

**Table S6S7.** The concentration of PM<sub>2.5</sub> and its main chemical components during wintertime in Xi'an, Shijiazhuang, and Beijing in the last decades.

| City         | Year  | PM <sub>2.5</sub>  | OA <sup>a</sup>    | EC                 | SO <sub>4</sub> <sup>2-</sup> | NO <sub>3</sub> <sup>-</sup> | NH <sub>4</sub> <sup>+</sup> | Others             | References         |
|--------------|-------|--------------------|--------------------|--------------------|-------------------------------|------------------------------|------------------------------|--------------------|--------------------|
|              |       | µg m <sup>-3</sup> | µg m <sup>-3</sup> | µg m <sup>-3</sup> | µg m <sup>-3</sup>            | µg m <sup>-3</sup>           | µg m <sup>-3</sup>           | µg m <sup>-3</sup> |                    |
| Xi'an        | 2003  | 356                | 153.3              | 21.5               | 53.8                          | 29.2                         | 29.6                         | 68.9               | Cao et al., 2012   |
|              | 2006  | 230                | 57.4               | 11.4               | 45.9                          | 20.6                         | 14.2                         | 80.0               | Xu et al., 2016    |
|              | 2008  | 199                | 48.3               | 9.9                | 42.5                          | 20.8                         | 11.0                         | 66.9               | Xu et al., 2016    |
|              | 2010  | 233                | 60.0               | 14.7               | 30.6                          | 22.9                         | 12.3                         | 92.8               | Xu et al., 2016    |
|              | 2012  | 196                | 56.3               | 8.2                | 27.0                          | 19.2                         | 13.3                         | 71.9               | Zhang et al., 2015 |
|              | 2013  | 263                | 45.8               | 7.1                | 31.7                          | 29.2                         | 17.1                         | 132.5              | Niu et al., 2016   |
|              | 2014  | 156                | 57.4               | 2.5                | 16.2                          | 20.6                         | 9.4                          | 49.7               | Dai et al., 2018   |
|              | 2018  | 189                | 42.1               | 4.9                | 9.7                           | 14.5                         | 6.6                          | 111.0              | Wang et al., 2022  |
| 2020*        | 77    | 25.9               | 4.5                | 5.2                | 18.5                          | 6.2                          | 16.2                         | This study         |                    |
| Shijiazhuang | 2010  | 227                | 75.6               | 12.2               | 33.2                          | 25.3                         | 10.5                         | 70.2               | Zhao et al., 2013  |
|              | 2015  | 232                | 82.0               | 16.3               | 26.6                          | 27.4                         | 19.8                         | 59.7               | Huang et al., 2017 |
|              | 2016  | 193                | 63.2               | 13.5               | 29.5                          | 24.0                         | 17.0                         | 45.8               | Liu et al., 2019   |
|              | 2017  | 97                 | 31.2               | 6.5                | 12.5                          | 16.5                         | 12.5                         | 17.8               | Liu et al., 2019   |
|              | 2018  | 96                 | 35.8               | 10.1               | 10.5                          | 15.3                         | 6.3                          | 18.0               | Zhang et al., 2020 |
|              | 2022* | 60                 | 16.0               | 3.9                | 7.0                           | 15.8                         | 7.0                          | 9.8                | This study         |
| Beijing      | 2001  | 122                | 51.5               | 11.3               | 9.9                           | 10.7                         | 7.1                          | 31.5               | Duan et al., 2006  |
|              | 2003  | 116                | 38.2               | 6.2                | 20.0                          | 13.1                         | 9.4                          | 29.1               | Cao et al., 2012   |
|              | 2004  | 107                | 53.8               | 8.3                | 12.7                          | 8.3                          | 6.0                          | 17.9               | Song et al., 2007  |
|              | 2010  | 127                | 42.9               | 7.1                | 14.2                          | 17.1                         | 5.2                          | 40.5               | Zhao et al., 2013  |
|              | 2013  | 132                | 38.5               | 6.4                | 21.9                          | 18.5                         | 15.1                         | 31.6               | Tao et al., 2015   |
|              | 2014  | 138                | 46.4               | 5.2                | 21.0                          | 26.0                         | 14.1                         | 25.3               | Ma et al., 2017    |
|              | 2016  | 130                | 75.7               | 20.2               | 12.3                          | 5.5                          | 10.5                         | 5.3                | Xu et al., 2018    |
|              | 2021* | 64                 | 22.1               | 1.9                | 9.6                           | 15.2                         | 9.2                          | 6.4                | This study         |

197  
198

\* study was conducted on online monitoring equipment, and the rest studies were researched on filter sampling experiments.

<sup>a</sup> Assumption of OA = 1.6 × OC for the filter-based sampling experiments

199 **Table S7S8.** The concentration of PM<sub>2.5</sub> and its source contribution during wintertime in Xi'an, Shijiazhuang, and  
 200 Beijing in the last decades.

| City         | Year  | PM <sub>2.5</sub>  | Vehicle                        | Coal                             | Secondary                                     | Fugitive                   | Industrial                     | Biomass                       | Others             | References         |
|--------------|-------|--------------------|--------------------------------|----------------------------------|-----------------------------------------------|----------------------------|--------------------------------|-------------------------------|--------------------|--------------------|
|              |       | μg m <sup>-3</sup> | emission<br>μg m <sup>-3</sup> | combustion<br>μg m <sup>-3</sup> | <u>formation</u> source<br>μg m <sup>-3</sup> | dust<br>μg m <sup>-3</sup> | emission<br>μg m <sup>-3</sup> | burning<br>μg m <sup>-3</sup> | μg m <sup>-3</sup> |                    |
| Xi'an        | 2006  | 392                | 74.5                           | 121.5                            | 82.3                                          | 51.0                       | 39.2                           | 23.5                          |                    | Xu et al., 2016    |
|              | 2008  | 199                | 41.8                           | 55.7                             | 45.8                                          | 23.9                       | 21.9                           | 10.0                          |                    | Xu et al., 2016    |
|              | 2010  | 233                | 48.9                           | 55.9                             | 41.9                                          | 44.3                       | 30.3                           | 11.7                          |                    | Xu et al., 2016    |
|              | 2014  | 169                | 20.3                           | 47.3                             | 71.0                                          | 8.5                        | 6.8                            | 15.2                          |                    | Dai et al., 2020   |
|              | 2018  | 189                | 26.5                           | 28.4                             |                                               | 15.1                       | 22.7                           | 58.6                          | 37.8               | Wang et al., 2022  |
|              | 2020* | 77                 | 10.0                           | 11.6                             | 24.6                                          | 6.2                        | 6.2                            | 19.3                          |                    | This study         |
| Shijiazhuang | 2015  | 232                | 46.4                           | 62.6                             | 30.2                                          | 20.9                       | 16.2                           | 7.0                           | 48.7               | Huang et al., 2017 |
|              | 2016  | 181                | 23.5                           | 54.3                             | 54.3                                          | 30.8                       | 9.1                            |                               | 7.2                | Liu et al., 2018   |
|              | 2019  | 119                | 21.4                           | 21.4                             | 42.8                                          | 21.4                       | 6.0                            | 6.0                           |                    | Diao et al., 2021  |
|              | 2022* | 60                 | 7.2                            | 9.6                              | 22.8                                          | 2.4                        | 3.0                            | 14.4                          |                    | This study         |
| Beijing      | 2004  | 107                | 8.6                            | 40.7                             | 19.3                                          | 7.5                        |                                | 16.1                          | 15.0               | Song et al., 2007  |
|              | 2010  | 139                |                                | 79.2                             | 8.3                                           | 22.2                       | 16.7                           | 9.7                           | 2.8                | Zhang et al., 2013 |
|              | 2013  | 159                | 9.5                            | 41.3                             | 79.5                                          | 15.9                       |                                | 9.5                           | 3.2                | Huang et al., 2014 |
|              | 2015  | 125                | 48.8                           | 15.0                             | 23.8                                          | 8.8                        | 2.5                            | 6.3                           | 18.8               | Huang et al., 2017 |
|              | 2021* | 64                 | 7.0                            | 5.8                              | 33.3                                          | 2.6                        | 2.6                            | 11.5                          | 1.3                | This study         |

\* study was conducted on online monitoring equipment, and the rest studies were researched on filter sampling experiments.

201  
202

203  
204  
205  
206  
207  
208  
209  
210  
211  
212  
213  
214  
215  
216  
217  
218  
219  
220  
221  
222  
223  
224  
225  
226  
227  
228  
229  
230  
231  
232  
233  
234  
235

## References:

- Cao, J.-J., Shen, Z.-X., Chow, J. C., Watson, J. G., Lee, S.-C., Tie, X.-X., Ho, K.-F., Wang, G.-H., and Han, Y.-M.: Winter and summer PM<sub>2.5</sub> chemical compositions in fourteen Chinese cities, *J. Air Waste Manage.*, 62, 1214–1226, <https://doi.org/10.1080/10962247.2012.701193>, 2012.
- [Chen, L., Lowenthal, D., Watson, J., Koracin, D., Kumar, N., Knipping, E., Wheeler, N., Craig, K., Reid, S.: Toward effective source apportionment using positive matrix factorization: experiments with simulated PM<sub>2.5</sub> data. \*J. Air Waste Manage.\*, 60\(1\), 43–54, <https://doi.org/10.3155/1047-3289.60.1.43>, 2010.](#)
- Dai, Q., Bi, X., Liu, B., Li, L., Ding, J., Song, W., Bi, S., Schulze, B. C., Song, C., Wu, J., Zhang, Y., Feng, Y., and Hopke, P. K.: Chemical nature of PM<sub>2.5</sub> and PM<sub>10</sub> in Xi'an, China: Insights into primary emissions and secondary particle formation, *Environ. Pollut.*, 240, 155–166, <https://doi.org/10.1016/j.envpol.2018.04.111>, 2018.
- Dai, Q., Hopke, P. K., Bi, X., and Feng, Y.: Improving apportionment of PM<sub>2.5</sub> using multisite PMF by constraining G-values with a priori information, *Sci. Total Environ.*, 736, 139657, <https://doi.org/10.1016/j.scitotenv.2020.139657>, 2020.
- Diao, L., Zhang, H., Liu, B., Dai, C., Zhang, Y., Dai, Q., Bi, X., Zhang, L., Song, C., and Feng, Y.: Health risks of inhaled selected toxic elements during the haze episodes in Shijiazhuang, China: Insight into critical risk sources, *Environ. Pollut.*, 276, 116664, <https://doi.org/10.1016/j.envpol.2021.116664>, 2021.
- Duan, F., He, K., Ma, Y., Yang, F., Yu, X., Cadle, S., Chan, T., and Mulawa, P.: Concentration and chemical characteristics of PM<sub>2.5</sub> in Beijing, China: 2001–2002, *Sci. Total Environ.*, 355, 264–275, <https://doi.org/10.1016/j.scitotenv.2005.03.001>, 2006.
- Huang, R.-J., Zhang, Y., Bozzetti, C., Ho, K.-F., Cao, J.-J., Han, Y., Daellenbach, K. R., Slowik, J. G., Platt, S. M., Canonaco, F., Zotter, P., Wolf, R., Pieber, S. M., Bruns, E. A., Crippa, M., Ciarelli, G., Piazzalunga, A., Schwikowski, M., Abbaszade, G., Schnelle-Kreis, J., Zimmermann, R., An, Z., Szidat, S., Baltensperger, U., Haddad, I. E., and Prévôt, A. S. H.: High secondary aerosol contribution to particulate pollution during haze events in China, *Nature*, 514, 218–222, <https://doi.org/10.1038/nature13774>, 2014.
- Huang, X., Liu, Z., Liu, J., Hu, B., Wen, T., Tang, G., Zhang, J., Wu, F., Ji, D., Wang, L., and Wang, Y.: Chemical characterization and source identification of PM<sub>2.5</sub> at multiple sites in the Beijing–Tianjin–Hebei region, China, *Atmos. Chem. Phys.*, 17, 12941–12962, <https://doi.org/10.5194/acp-17-12941-2017>, 2017.
- Liu, B., Cheng, Y., Zhou, M., Liang, D., Dai, Q., Wang, L., Jin, W., Zhang, L., Ren, Y., Zhou, J., Dai, C., Xu, J., Wang, J., Feng, Y., and Zhang, Y.: Effectiveness evaluation of temporary emission control action in 2016 in winter in Shijiazhuang, China, *Atmos. Chem. Phys.*, 18, 7019–7039, <https://doi.org/10.5194/acp-18-7019-2018>, 2018.
- Liu, G., Xin, J., Wang, X., Si, R., Ma, Y., Wen, T., Zhao, L., Zhao, D., Wang, Y., and Gao, W.: Impact of the coal banning zone on visibility in the Beijing–Tianjin–Hebei region, *Sci. Total Environ.*, 692, 402–410, <https://doi.org/10.1016/j.scitotenv.2019.07.006>, 2019.

- 236 Liu, H., Wang, Q., Ye, J., Su, X. li, Zhang, T., Zhang, Y., Tian, J., Dong, Y., Chen, Y., Zhu, C., Han, Y., and Cao, J.: Changes  
237 in Source-Specific Black Carbon Aerosol and the Induced Radiative Effects Due to the COVID-19 Lockdown,  
238 *Geophys. Res. Lett.*, 48, <https://doi.org/10.1029/2021GL092987>, 2021.
- 239 Ma, Q., Wu, Y., Tao, J., Xia, Y., Liu, X., Zhang, D., Han, Z., Zhang, X., and Zhang, R.: Variations of Chemical Composition  
240 and Source Apportionment of PM<sub>2.5</sub> during Winter Haze Episodes in Beijing, *Aerosol Air Qual. Res.*, 17, 2791–2803,  
241 <https://doi.org/10.4209/aaqr.2017.10.0366>, 2017.
- 242 Niu, X., Cao, J., Shen, Z., Ho, S. S. H., Tie, X., Zhao, S., Xu, H., Zhang, T., and Huang, R.: PM<sub>2.5</sub> from the Guanzhong  
243 Plain: Chemical composition and implications for emission reductions, *Atmos. Environ.*, 147, 458–469,  
244 <https://doi.org/10.1016/j.atmosenv.2016.10.029>, 2016.
- 245 Rai, P., Furger, M., Slowik, J. G., Canonaco, F., Fröhlich, R., Hüglin, C., Minguillón, M. C., Petterson, K., Baltensperger,  
246 U., and Prévôt, A. S. H.: Source apportionment of highly time-resolved elements during a firework episode from a  
247 rural freeway site in Switzerland, *Atmos. Chem. Phys.*, 20, 1657–1674, <https://doi.org/10.5194/acp-20-1657-2020>,  
248 2020.
- 249 Salameh, D., Pey, J., Bozzetti, C., El Haddad, I., Detournay, A., Sylvestre, A., Canonaco, F., Armengaud, A., Piga, D.,  
250 Robin, D., Prevot, A. S. H., Jaffrezo, J.-L., Wortham, H., and Marchand, N.: Sources of PM<sub>2.5</sub> at an urban-industrial  
251 Mediterranean city, Marseille (France): Application of the ME-2 solver to inorganic and organic markers, *Atmos. Res.*,  
252 214, 263–274, <https://doi.org/10.1016/j.atmosres.2018.08.005>, 2018.
- 253 Salameh, T., Sauvage, S., Afif, C., Borbon, A., and Locoge, N.: Source apportionment vs. emission inventories of non-  
254 methane hydrocarbons (NMHC) in an urban area of the Middle East: local and global perspectives, *Atmos. Chem.*  
255 *Phys.*, 16, 3595–3607, <https://doi.org/10.5194/acp-16-3595-2016>, 2016.
- 256 [Shrivastava, M., Cappa, C., Fan, J., Goldstein, A., Guenther, A., Jimenez, J., Kuang, C., Laskin, A., Martin S., Ng, N.,](#)  
257 [Petaja, T., Pierce, J., Rasch, P., Roldin, P., Senfeld, J., Shiling, J., Smith, J., Thornton, J., Volkamer, R., Wang, J.,](#)  
258 [Worsnop, D., Zaveri, R., Zelenyuk, A., Zhang, Q.: secondary organic aerosol: Implications for global climate forcing.](#)  
259 [Rev. Geophys., 55, 509–559. <https://doi.org/10.1002/2016RG000540>, 2017.](#)
- 260 Song, Y., Tang, X., Xie, S., Zhang, Y., Wei, Y., Zhang, M., Zeng, L., and Lu, S.: Source apportionment of PM<sub>2.5</sub> in Beijing  
261 in 2004, *J. Hazard. Mater.*, 146, 124–130, <https://doi.org/10.1016/j.jhazmat.2006.11.058>, 2007.
- 262 Tao, J., Zhang, L., Gao, J., Wang, H., Chai, F., and Wang, S.: Aerosol chemical composition and light scattering during a  
263 winter season in Beijing, *Atmos. Environ.*, 110, 36–44, <https://doi.org/10.1016/j.atmosenv.2015.03.037>, 2015.
- 264 [Wang, Q.; Han, Y.; Ye, J.; Liu, S.; Pongpiachan, S.; Zhang, N.; Han, Y.; Tian, J.; Wu, C.; Long, X.; Zhang, Q.; Zhang, W.;](#)  
265 [Zhao, Z.; Cao, J.: High Contribution of secondary brown carbon to aerosol light absorption in the southeastern margin](#)  
266 [of Tibetan Plateau. \*Geophys. Res. Lett.\* 46, 4962–4970, <https://doi.org/10.1029/2019GL082731>, 2019.](#)
- 267 Wang, Z., Wang, R., Wang, J., Wang, Y., McPherson Donahue, N., Tang, R., Dong, Z., Li, X., Wang, L., Han, Y., and Cao,  
268 J.: The seasonal variation, characteristics and secondary generation of PM<sub>2.5</sub> in Xi'an, China, especially during  
269 pollution events, *Environ. Res.*, 212, 113388, <https://doi.org/10.1016/j.envres.2022.113388>, 2022.

- 270 Xu, H., Cao, J., Chow, J. C., Huang, R.-J., Shen, Z., Chen, L. W. A., Ho, K. F., and Watson, J. G.: Inter-annual variability  
271 of wintertime PM<sub>2.5</sub> chemical composition in Xi'an, China: Evidences of changing source emissions, *Sci. Total*  
272 *Environ.*, 545–546, 546–555, <https://doi.org/10.1016/j.scitotenv.2015.12.070>, 2016.
- 273 Xu, X., Zhang, H., Chen, J., Li, Q., Wang, X., Wang, W., Zhang, Q., Xue, L., Ding, A., and Mellouki, A.: Six sources  
274 mainly contributing to the haze episodes and health risk assessment of PM<sub>2.5</sub> at Beijing suburb in winter 2016,  
275 *Ecotoxicol. Environ. Saf.*, 166, 146–156, <https://doi.org/10.1016/j.ecoenv.2018.09.069>, 2018.
- 276 Zhang, Q., Shen, Z., Cao, J., Zhang, R., Zhang, L., Huang, R.-J., Zheng, C., Wang, L., Liu, S., Xu, H., Zheng, C., and Liu,  
277 P.: Variations in PM<sub>2.5</sub>, TSP, BC, and trace gases (NO<sub>2</sub>, SO<sub>2</sub>, and O<sub>3</sub>) between haze and non-haze episodes in winter  
278 over Xi'an, China, *Atmos. Environ.*, 112, 64–71, <https://doi.org/10.1016/j.atmosenv.2015.04.033>, 2015.
- 279 Zhang, R., Jing, J., Tao, J., Hsu, S.-C., Wang, G., Cao, J., Lee, C. S. L., Zhu, L., Chen, Z., Zhao, Y., and Shen, Z.: Chemical  
280 characterization and source apportionment of PM<sub>2.5</sub> in Beijing: seasonal perspective, *Atmos. Chem. Phys.*, 13, 7053–  
281 7074, <https://doi.org/10.5194/acp-13-7053-2013>, 2013.
- 282 Zhang, W., Liu, B., Zhang, Y., Li, Y., Sun, X., Gu, Y., Dai, C., Li, N., Song, C., Dai, Q., Han, Y., and Feng, Y.: A refined  
283 source apportionment study of atmospheric PM<sub>2.5</sub> during winter heating period in Shijiazhuang, China, using a  
284 receptor model coupled with a source-oriented model, *Atmos. Environ.*, 222, 117157,  
285 <https://doi.org/10.1016/j.atmosenv.2019.117157>, 2020.
- 286 Zhao, P. S., Dong, F., He, D., Zhao, X. J., Zhang, X. L., Zhang, W. Z., Yao, Q., and Liu, H. Y.: Characteristics of  
287 concentrations and chemical compositions for PM<sub>2.5</sub> in the region of Beijing, Tianjin, and Hebei, China, *Atmos. Chem.*  
288 *Phys.*, 13, 4631–4644, <https://doi.org/10.5194/acp-13-4631-2013>, 2013.
